# Supplementary material
Source: PubMed Central journal article supplement (PMC5802359)

## Supporting Information (SI)

### Hydroxylamine Chemical Digestion for Insoluble Extracellular Matrix Characterization

Alexander S. Barrett<sup>1</sup>, Matthew J. Wither<sup>1,2</sup>, Ryan C. Hill<sup>1,2</sup>, Monika Dzieciatkowska<sup>1,2</sup>, Angelo D'Alessandro<sup>1,2</sup>, Julie A. Reisz<sup>1,2</sup>, Kirk C. Hansen<sup>\*1,2</sup>

<sup>1</sup>Department of Biochemistry and Molecular Genetics, University of Colorado Denver, Aurora, Colorado, USA.

<sup>2</sup>Biological Mass Spectrometry Facility, University of Colorado Denver, Aurora, Colorado, USA

*\* To whom correspondence should be addressed. Kirk C Hansen, 12801 East 17<sup>th</sup> Ave., Aurora, CO, (303) 724-5544, [kirk.hansen@ucdenver.edu](mailto:kirk.hansen@ucdenver.edu)*

#### Table of Contents:

Supplementary Table S1 – Observed hydroxylamine cleavage results

Supplementary Table S2 – LC-SRM individual protein results

Supplementary Table S3 – Fold change analysis of ECM protein groups from LC-SRM data

Supplementary Table S4 – Data-dependent LC-MS/MS results

Supplementary Table S5 – Protein and peptide identifications from data-dependent LC-MS/MS experiments

Supplementary Figure S1 – Cyanogen bromide and hydroxylamine reaction mechanisms

Supplementary Figure S2 – Error Tolerant Search Results from LC-MS/MS data

Supplementary Table S1 – Observed NH<sub>2</sub>OH cleavage results

| Peptide N-term Cleavage Site           |                |                           |                | Peptide C-term Cleavage Site |             |                |
|----------------------------------------|----------------|---------------------------|----------------|------------------------------|-------------|----------------|
| All peptides N-terminal cleavage at P1 | # Observations | P1' Occurance when P1 = N | # Observations | Ratio NG/NX                  | Position P1 | # Observations |
| K                                      | 9578           | G                         | 314            | 1                            | K           | 10081          |
| R                                      | 9849           | A                         | 246            | 1.28                         | R           | 11063          |
| N                                      | 1534           | S                         | 155            | 2.03                         | N           | 79             |
| A                                      | 0              | E                         | 119            | 2.64                         | A           | 0              |
| D                                      | 0              | P                         | 104            | 3.02                         | D           | 0              |
| E                                      | 0              | L                         | 97             | 3.24                         | E           | 0              |
| F                                      | 0              | D                         | 90             | 3.49                         | F           | 0              |
| G                                      | 0              | K                         | 88             | 3.57                         | G           | 1              |
| H                                      | 0              | V                         | 67             | 4.69                         | H           | 0              |
| I                                      | 0              | T                         | 58             | 5.41                         | I           | 1              |
| L                                      | 0              | Q                         | 36             | 8.72                         | L           | 5              |
| M*                                     | 86             | M                         | 33             | 9.52                         | M           | 4              |
| Q                                      | 0              | R                         | 26             | 12.08                        | Q           | 0              |
| P                                      | 0              | I                         | 25             | 12.56                        | P           | 3              |
| S                                      | 0              | F                         | 18             | 17.44                        | S           | 0              |
| T                                      | 0              | W                         | 18             | 17.44                        | T           | 0              |
| W                                      | 0              | H                         | 17             | 18.47                        | W           | 0              |
| Y                                      | 0              | N                         | 15             | 20.93                        | Y           | 0              |
| V                                      | 0              | Y                         | 8              | 39.25                        | V           | 0              |
| C                                      | 0              | C                         | 0              | 0.00                         | C           | 0              |

\* exclusively protein N-termini

Supplementary Table S2 – LC-SRM individual protein results

| Bone                                                | Protein            | Functional   | Matrisome                                 | Gene    | Quantified protein (fmol/mg) |         |         |                    |         |         |
|-----------------------------------------------------|--------------------|--------------|-------------------------------------------|---------|------------------------------|---------|---------|--------------------|---------|---------|
|                                                     |                    |              |                                           |         | CNBr                         |         |         | NH <sub>2</sub> OH |         |         |
|                                                     |                    |              |                                           |         | Femur 1                      | Femur 2 | Femur 3 | Femur 1            | Femur 2 | Femur 3 |
| Actin (All Isoforms)                                | Cytoskeletal       | Cellular     | act                                       | 99.3    | 58.7                         | 80.3    | 434.3   | 504.8              | 389.1   |         |
| Actin_cytoplasmic 1/2                               | Cytoskeletal       | Cellular     | actb                                      | 20.0    | 14.7                         | 14.3    | 46.6    | 13.7               | 17.8    |         |
| Desmin                                              | Cytoskeletal       | Cellular     | des                                       | 5.6     | 5.8                          | 5.8     | 11.3    | 12.4               | 9.4     |         |
| Tubulin beta-4B chain(4b & 5 chain)                 | Cytoskeletal       | Cellular     | tubb                                      | 2.1     | 1.8                          | 2.2     | 19.2    | 11.7               | 13.6    |         |
| Vimentin                                            | Cytoskeletal       | Cellular     | vim                                       | 9.6     | 9.1                          | 7.7     | 21.4    | 8.3                | 11.9    |         |
| Collagen alpha-1(I) chain                           | Fibrillar Collagen | Collagen     | col1a1                                    | 14058.4 | 13651.5                      | 11625.5 | 8475.9  | 7874.2             | 9002.4  |         |
| Collagen alpha-1(IV) chain(Arresten/Core Protein)   | Basement Membrane  | Collagen     | col4a1                                    | 7.5     | 11.2                         | 9.9     | 17.0    | 18.5               | 26.3    |         |
| Collagen alpha-1(VI) chain                          | Structural ECM     | Collagen     | col6a1                                    | 234.1   | 218.2                        | 233.5   | 185.5   | 98.7               | 126.1   |         |
| Collagen alpha-1(XIV) chain                         | FACIT Collagen     | Collagen     | col14a1                                   | 7.5     | 6.1                          | 6.5     | 14.5    | 8.6                | 9.5     |         |
| Collagen alpha-2(I) chain                           | Fibrillar Collagen | Collagen     | col1a2                                    | 7502.3  | 7478.5                       | 6145.2  | 6442.9  | 4875.2             | 7248.7  |         |
| Collagen alpha-2(IV) chain(Canstatin/Core Protein)  | Basement Membrane  | Collagen     | col4a2                                    | 10.5    | 6.6                          | 8.6     | 20.0    | 16.8               | 20.3    |         |
| Collagen alpha-2(V) chain                           | Fibrillar Collagen | Collagen     | col5a2                                    | 116.9   | 108.5                        | 73.9    | 97.4    | 71.8               | 98.4    |         |
| Collagen alpha-2(VI) chain                          | Structural ECM     | Collagen     | col6a2                                    | 316.1   | 229.0                        | 191.7   | 259.7   | 128.8              | 201.1   |         |
| Collagen alpha-3(VI) chain                          | Structural ECM     | Collagen     | col6a3                                    | 325.1   | 275.6                        | 269.2   | 248.5   | 135.9              | 212.5   |         |
| Dermatopontin                                       | Structural ECM     | Glycoprotein | dpt                                       | 2.5     | 1.9                          |         | 1.9     | 1.7                | 2.1     |         |
| Emilin 1                                            | Structural ECM     | Glycoprotein | emilin1                                   | 2.3     | 2.2                          | 2.2     | 3.4     | 1.7                | 2.5     |         |
| Fibrillin 1                                         | Structural ECM     | Glycoprotein | fn1                                       | 4.9     | 2.3                          | 11.9    | 27.1    | 17.9               | 35.3    |         |
| Fibronectin 1(type-III 7 domain)                    | Structural ECM     | Glycoprotein | fn1                                       | 88.6    | 70.8                         | 62.0    | 209.6   | 90.0               |         |         |
| Fibronectin 1(type-III 9 domain)                    | Structural ECM     | Glycoprotein | fn1                                       | 12.0    |                              | 11.5    | 132.3   | 50.6               | 48.1    |         |
| Laminin alpha-2                                     | Basement Membrane  | Glycoprotein | lama2                                     | 1.6     | 1.4                          | 1.6     | 3.7     | 3.8                | 4.5     |         |
| Matrilin 1, Cartilage Matrix Protein                | Structural ECM     | Glycoprotein | matn1                                     | 14.6    | 5.4                          | 5.4     | 34.7    | 1.8                | 3.4     |         |
| Periostin                                           | Matricellular      | Glycoprotein | postn                                     | 27.1    | 64.0                         | 31.5    | 16.2    | 15.1               | 19.7    |         |
| Biglycan                                            | Structural ECM     | Proteoglycan | bgn                                       | 97.5    | 55.7                         | 67.5    | 52.8    | 14.4               | 17.6    |         |
| Bone Marrow Proteoglycan(BMP & Eosinophil granule m | Other ECM          | Proteoglycan | prg2                                      | 2.3     | 1.1                          | 1.6     | 25.8    | 13.1               | 16.8    |         |
| Lumican                                             | Structural ECM     | Proteoglycan | lum                                       | 12.2    | 10.5                         | 10.0    | 5.6     | 3.2                | 4.6     |         |
| Mimelan/Osteoglycin                                 | Other ECM          | Proteoglycan | ogn                                       | 6.1     | 7.8                          | 8.4     | 14.3    | 10.9               | 11.8    |         |
| Perlecan                                            | Basement Membrane  | Proteoglycan | hspg2                                     | 42.1    | 25.3                         | 33.2    | 57.5    | 21.1               | 23.0    |         |
|                                                     |                    |              | <b>Total Quantified Protein (fmol/mg)</b> | 23028.7 | 22323.6                      | 18921.1 | 16879.1 | 14024.6            | 17576.6 |         |

| Skin                                                       | Protein            | Functional     | Matrisome                                 | Gene   | Quantified protein (fmol/mg) |        |        |                    |        |        |
|------------------------------------------------------------|--------------------|----------------|-------------------------------------------|--------|------------------------------|--------|--------|--------------------|--------|--------|
|                                                            |                    |                |                                           |        | CNBr                         |        |        | NH <sub>2</sub> OH |        |        |
|                                                            |                    |                |                                           |        | Skin 1                       | Skin 2 | Skin 3 | Skin 1             | Skin 2 | Skin 3 |
| Actin (All Isoforms)                                       | Cytoskeletal       | Cellular       | act                                       | 77.3   | 18.6                         | 54.1   | 211.1  | 150.8              | 199.6  |        |
| Actin_cytoplasmic 1/2                                      | Cytoskeletal       | Cellular       | actb                                      | 42.5   | 32.1                         | 2.3    | 41.3   | 87.6               | 65.3   |        |
| Desmin                                                     | Cytoskeletal       | Cellular       | des                                       | 2.0    | 1.0                          | 3.1    | 3.3    | 1.9                | 3.3    |        |
| Histone 2A(H2A-A-K)                                        | Other Cellular     | Cellular       | h2a                                       | 43.0   | 41.3                         | 10.6   | 28.4   | 36.6               | 54.8   |        |
| Histone H1(H1.1,H1.2,H1.3,H1.4)                            | Other Cellular     | Cellular       | h1                                        | 32.5   | 29.9                         | 9.9    | 51.1   | 47.2               | 59.6   |        |
| Tubulin beta-4B chain(4b & 5 chain)                        | Cytoskeletal       | Cellular       | tubb                                      | 2.7    | 0.8                          | 27.0   | 12.7   | 16.4               | 14.8   |        |
| Vimentin                                                   | Cytoskeletal       | Cellular       | vim                                       | 8.6    | 7.9                          | 8.1    | 3.1    | 2.9                | 2.8    |        |
| Collagen alpha-1(I) chain                                  | Fibrillar Collagen | Collagen       | col1a1                                    | 4412.7 | 2566.0                       | 3107.5 | 3097.9 | 2838.1             | 3161.7 |        |
| Collagen alpha-1(IV) chain(Arresten/Core Protein)          | Basement Membrane  | Collagen       | col4a1                                    | 23.8   | 17.2                         | 21.9   | 31.2   | 40.1               | 44.9   |        |
| Collagen alpha-1(VI) chain                                 | Structural ECM     | Collagen       | col6a1                                    | 183.8  | 122.7                        | 38.2   | 236.2  | 304.5              | 289.4  |        |
| Collagen alpha-1(VII) chain(Fibronectin type-III 3 Domain) | Structural ECM     | Collagen       | col7a1                                    | 10.1   | 0.2                          | 16.4   | 7.0    | 13.9               | 12.8   |        |
| Collagen alpha-1(XIV) chain                                | FACIT Collagen     | Collagen       | col14a1                                   | 25.2   | 11.0                         | 24.9   | 41.7   | 41.1               | 62.4   |        |
| Collagen alpha-1/5(IV) chain(Arresten/Core Protein)        | Basement Membrane  | Collagen       | col4a1/5                                  | 38.9   | 14.5                         | 1.8    | 17.1   | 24.6               | 18.5   |        |
| Collagen alpha-2(I) chain                                  | Fibrillar Collagen | Collagen       | col1a2                                    | 1852.7 | 1023.3                       | 1275.0 | 1954.1 | 1813.8             | 1962.7 |        |
| Collagen alpha-2(IV) chain(Canstatin/Core Protein)         | Basement Membrane  | Collagen       | col4a2                                    | 5.5    | 2.6                          |        | 32.6   | 39.7               | 41.6   |        |
| Collagen alpha-2(V) chain                                  | Fibrillar Collagen | Collagen       | col5a2                                    | 11.7   | 6.5                          | 14.6   | 17.7   | 10.8               | 20.0   |        |
| Collagen alpha-2(VI) chain                                 | Structural ECM     | Collagen       | col6a2                                    | 213.7  | 132.7                        | 100.8  | 321.7  | 455.3              | 396.1  |        |
| Collagen alpha-3(VI) chain                                 | Structural ECM     | Collagen       | col6a3                                    | 212.1  | 125.1                        | 121.9  | 204.8  | 251.9              | 231.5  |        |
| Collagen, type VII, alpha 1(Fibronectin type-III 1 Domain) | Structural ECM     | Collagen       | col7a1                                    | 6.0    | 4.3                          | 2.5    | 4.5    | 5.9                | 6.0    |        |
| Annexin A2                                                 | Other ECM          | ECM-affiliated | anxa2                                     | 4.3    | 3.8                          | 2.7    | 3.1    | 2.4                | 3.0    |        |
| Dermatopontin                                              | Structural ECM     | Glycoprotein   | dpt                                       | 2.9    | 3.0                          | 1.5    | 3.1    | 3.2                | 3.3    |        |
| Fibrillin 1                                                | Structural ECM     | Glycoprotein   | fn1                                       | 53.5   | 22.2                         | 117.4  | 31.6   | 26.4               | 36.2   |        |
| Fibulin 5                                                  | Matricellular      | Glycoprotein   | fn5                                       | 1.2    | 1.3                          | 1.4    | 0.8    | 1.0                | 0.9    |        |
| Laminin alpha-2                                            | Basement Membrane  | Glycoprotein   | lama2                                     | 2.6    | 1.2                          | 1.1    | 3.4    | 2.6                | 2.9    |        |
| Laminin Beta-1                                             | Basement Membrane  | Glycoprotein   | lamb1                                     | 1.4    | 0.8                          | 0.8    | 1.8    | 2.0                | 1.9    |        |
| Laminin Beta-2                                             | Basement Membrane  | Glycoprotein   | lamb2                                     | 2.0    | 1.0                          | 1.0    | 1.7    | 1.5                | 2.0    |        |
| Myosin(Myosin-3,4,6,7)                                     | Cytoskeletal       | Glycoprotein   | myh*                                      | 69.8   | 14.0                         | 74.0   | 136.8  | 68.8               | 112.7  |        |
| Periostin                                                  | Matricellular      | Glycoprotein   | postn                                     | 7.7    | 3.9                          | 5.5    | 5.9    | 7.1                | 8.6    |        |
| Biglycan                                                   | Structural ECM     | Proteoglycan   | bgn                                       | 4.2    | 4.2                          | 5.1    | 3.3    | 3.8                | 2.7    |        |
| Lumican                                                    | Structural ECM     | Proteoglycan   | lum                                       | 23.7   | 18.9                         | 1.5    | 11.7   | 13.8               | 13.0   |        |
| Mimelan/Osteoglycin                                        | Other ECM          | Proteoglycan   | ogn                                       | 10.9   | 8.8                          | 1.3    | 12.1   | 13.7               | 14.0   |        |
| Perlecan(Endorepellin)                                     | Basement Membrane  | Proteoglycan   | hspg2                                     | 13.5   | 6.9                          | 5.2    | 10.7   | 13.7               | 11.7   |        |
| Prolargin                                                  | Structural ECM     | Proteoglycan   | prelp                                     | 2.5    | 2.2                          | 2.2    | 2.3    | 2.1                | 2.1    |        |
|                                                            |                    |                | <b>Total Quantified Protein (fmol/mg)</b> | 7405.3 | 4250.0                       | 5061.1 | 6545.8 | 6345.1             | 6862.8 |        |

| Lung                                | Protein            | Functional | Matrisome | Gene  | Quantified protein (fmol/mg) |        |        |                    |        |        |
|-------------------------------------|--------------------|------------|-----------|-------|------------------------------|--------|--------|--------------------|--------|--------|
|                                     |                    |            |           |       | CNBr                         |        |        | NH <sub>2</sub> OH |        |        |
|                                     |                    |            |           |       | Lung 1                       | Lung 2 | Lung 3 | Lung 1             | Lung 2 | Lung 3 |
| Actin (All Isoforms)                | Cytoskeletal       | Cellular   | act       | 131.2 | 132.5                        | 135.0  | 64.3   | 78.9               | 67.1   |        |
| Actin_cytoplasmic 1/2               | Cytoskeletal       | Cellular   | actb      | 2.1   | 4.8                          | 6.1    | 57.5   | 67.1               | 59.8   |        |
| Desmin                              | Cytoskeletal       | Cellular   | des       | 5.2   | 13.6                         | 15.8   | 7.8    | 14.4               | 12.3   |        |
| Histone H1(H1.1,H1.2,H1.3,H1.4)     | Other Cellular     | Cellular   | h1        | 8.4   | 44.5                         | 76.5   | 42.0   | 81.1               | 35.0   |        |
| Tubulin beta-4B chain(4b & 5 chain) | Cytoskeletal       | Cellular   | tubb      |       |                              |        | 16.1   | 19.7               | 15.7   |        |
| Vimentin                            | Cytoskeletal       | Cellular   | vim       | 9.4   | 22.6                         | 15.8   | 21.7   | 24.7               | 21.9   |        |
| Collagen alpha-1(I) chain           | Fibrillar Collagen | Collagen   | col1a1    | 690.0 | 528.0                        | 432.0  | 781.1  | 862.8              | 809.0  |        |

|                                                    |                    |              |         |               |               |               |               |               |               |
|----------------------------------------------------|--------------------|--------------|---------|---------------|---------------|---------------|---------------|---------------|---------------|
| Collagen alpha-1(I) chain(fragment)                | Fibrillar Collagen | Collagen     | col1a1  | 451.3         | 303.2         | 281.8         | 601.3         | 572.4         | 513.6         |
| Collagen alpha-1(IV) chain(Arresten/Core Protein)  | Basement Membrane  | Collagen     | col4a1  |               |               |               | 232.5         | 192.9         | 239.0         |
| Collagen alpha-1(VI) chain                         | Structural ECM     | Collagen     | col6a1  | 89.6          | 78.5          | 58.0          | 113.7         | 92.8          | 106.5         |
| Collagen alpha-1(XIV) chain                        | FACIT Collagen     | Collagen     | col14a1 | 30.6          | 44.7          | 47.8          | 11.4          | 14.0          | 11.7          |
| Collagen alpha-2(I) chain                          | Fibrillar Collagen | Collagen     | col1a2  | 689.6         | 470.7         | 412.9         | 599.2         | 534.5         | 626.0         |
| Collagen alpha-2(IV) chain(Canstatin/Core Protein) | Basement Membrane  | Collagen     | col4a2  | 178.0         | 208.9         | 165.6         | 252.5         | 230.2         | 211.1         |
| Collagen alpha-2(V) chain                          | Fibrillar Collagen | Collagen     | col5a2  | 14.9          | 10.7          | 11.3          | 13.4          | 10.8          | 10.6          |
| Collagen alpha-2(VI) chain                         | Structural ECM     | Collagen     | col6a2  | 206.0         | 190.0         | 99.2          | 212.6         | 190.4         | 216.3         |
| Collagen alpha-3(VI) chain                         | Structural ECM     | Collagen     | col6a3  | 203.3         | 202.5         | 142.7         | 174.8         | 163.7         | 177.5         |
| Emilin 1                                           | Structural ECM     | Glycoprotein | emilin1 | 5.3           | 6.7           | 4.2           | 7.3           | 5.0           | 5.8           |
| Extracellular Matrix Protein 1                     | Other ECM          | Glycoprotein | ecm1    | 2.5           | 7.8           |               | 2.0           | 1.7           | 2.0           |
| Fibrillin 1                                        | Structural ECM     | Glycoprotein | fn1     | 3.5           | 12.9          | 10.0          | 80.6          | 102.3         | 63.2          |
| Fibronectin 1(type-III 9 domain)                   | Structural ECM     | Glycoprotein | fn1     | 11.2          | 16.3          | 21.2          | 96.3          | 96.3          | 83.8          |
| Fibulin 5                                          | Structural ECM     | Glycoprotein | fnl5    |               |               |               | 78.6          | 63.1          | 68.0          |
| Laminin alpha-2                                    | Basement Membrane  | Glycoprotein | lama2   |               |               |               | 3.9           | 3.5           | 3.5           |
| Laminin alpha-4                                    | Basement Membrane  | Glycoprotein | lama4   | 5.7           | 10.2          | 7.4           | 12.4          | 11.6          | 13.0          |
| Laminin alpha-5                                    | Basement Membrane  | Glycoprotein | lama5   | 19.1          | 24.4          | 18.1          | 16.9          | 12.3          | 14.3          |
| Laminin Beta-1                                     | Basement Membrane  | Glycoprotein | lamb1   | 3.5           | 11.1          |               | 11.0          | 9.2           | 9.4           |
| Laminin Beta-2                                     | Basement Membrane  | Glycoprotein | lamb2   | 12.2          | 20.1          | 11.9          | 21.4          | 18.8          | 17.1          |
| Laminin Gamma-1                                    | Basement Membrane  | Glycoprotein | lamc1   | 5.4           | 8.6           | 11.9          | 157.1         | 150.3         | 138.9         |
| Matrilin 1, Cartilage Matrix Protein               | Structural ECM     | Glycoprotein | matn1   |               |               |               | 1.1           | 0.0           | 0.9           |
| Matrix Gla protein                                 | Other ECM          | Glycoprotein | mgp     | 10.9          | 32.6          | 25.5          | 10.3          | 17.0          | 7.2           |
| Myosin(Myosin-3,4,6,7)                             | Cytoskeletal       | Glycoprotein | myh     | 6.9           | 8.5           | 9.5           | 13.7          | 7.5           | 12.5          |
| Nidogen 1/2 (osteonidogen)(Nid1/2)                 | Basement Membrane  | Glycoprotein | nid1/2  |               |               |               | 16.9          | 12.3          | 12.4          |
| Periostin                                          | Matricellular      | Glycoprotein | postn   | 12.6          | 15.6          | 12.3          | 13.8          | 12.4          | 12.7          |
| Vitronectin                                        | Structural ECM     | Glycoprotein | vtn     | 4.0           | 9.1           | 9.8           | 3.6           | 4.2           | 3.3           |
| Decorin                                            | Structural ECM     | Proteoglycan | dcn     |               |               | 3.0           | 1.1           | 1.1           | 1.1           |
| Mimecan/Osteoglycin                                | Other ECM          | Proteoglycan | ogn     | 22.0          | 21.4          | 20.2          | 17.1          | 17.2          | 13.8          |
| Perlecan                                           | Basement Membrane  | Proteoglycan | hspg2   | 34.3          | 53.3          | 28.5          | 106.4         | 84.6          | 97.9          |
| Perlecan(Endorepellin)                             | Basement Membrane  | Proteoglycan | hspg2   |               |               |               | 16.2          | 14.5          | 18.4          |
| <b>Total Quantified Protein (fmol/mg)</b>          |                    |              |         | <b>2868.7</b> | <b>2514.0</b> | <b>2094.0</b> | <b>3889.6</b> | <b>3795.4</b> | <b>3732.3</b> |

|                                           |                    |                  |             | <b>Quantified protein (fmol/mg)</b> |                 |                 |                         |                 |                 |
|-------------------------------------------|--------------------|------------------|-------------|-------------------------------------|-----------------|-----------------|-------------------------|-----------------|-----------------|
|                                           |                    |                  |             | <b>CNBr</b>                         |                 |                 | <b>NH<sub>2</sub>OH</b> |                 |                 |
| <b>Muscle</b>                             |                    |                  |             | <i>Muscle 1</i>                     | <i>Muscle 2</i> | <i>Muscle 3</i> | <i>Muscle 1</i>         | <i>Muscle 2</i> | <i>Muscle 3</i> |
| <b>Protein</b>                            | <b>Functional</b>  | <b>Matrisome</b> | <b>Gene</b> |                                     |                 |                 |                         |                 |                 |
| Actin (All Isoforms)                      | Cytoskeletal       | Cellular         | act         | 610.5                               | 186.9           | 488.4           | 952.2                   | 977.7           | 644.0           |
| Desmin                                    | Cytoskeletal       | Cellular         | des         | 10.3                                | 7.6             | 8.6             | 16.2                    | 11.3            | 10.7            |
| Tubulin beta-4B chain(4b & 5 chain)       | Cytoskeletal       | Cellular         | tubb        | 3.3                                 |                 |                 | 7.8                     | 6.4             | 8.5             |
| Vimentin                                  | Cytoskeletal       | Cellular         | vim         | 2.3                                 | 2.5             | 2.1             | 5.8                     | 4.1             | 3.0             |
| Collagen alpha-1(I) chain                 | Fibrillar Collagen | Collagen         | col1a1      | 528.6                               | 829.8           | 516.6           | 979.7                   | 938.4           | 681.3           |
| Collagen alpha-1(VI) chain                | Structural ECM     | Collagen         | col6a1      | 88.6                                | 22.8            | 46.5            | 62.4                    | 72.9            | 42.4            |
| Collagen alpha-1(XIV) chain               | FACIT Collagen     | Collagen         | col14a1     | 8.7                                 | 6.9             | 7.4             | 8.8                     | 7.2             | 7.9             |
| Collagen alpha-2(I) chain                 | Fibrillar Collagen | Collagen         | col1a2      | 239.1                               | 396.2           | 233.8           | 598.8                   | 580.1           | 536.0           |
| Collagen alpha-2(IV) chain                | Basement Membrane  | Collagen         | col4a2      | 8.5                                 | 11.4            | 10.8            | 32.3                    | 19.0            | 17.2            |
| Collagen alpha-2(V) chain                 | Fibrillar Collagen | Collagen         | col5a2      | 5.3                                 | 7.5             | 4.7             | 15.5                    | 13.9            | 11.7            |
| Collagen alpha-2(VI) chain                | Structural ECM     | Collagen         | col6a2      | 99.4                                | 36.8            | 49.3            | 67.5                    | 66.4            | 48.6            |
| Collagen alpha-3(VI) chain                | Structural ECM     | Collagen         | col6a3      | 24.0                                | 15.3            | 23.1            | 11.8                    | 16.5            | 12.7            |
| Fibrillin 1                               | Structural ECM     | Glycoprotein     | fn1         |                                     |                 |                 | 9.2                     | 9.9             | 6.5             |
| Laminin alpha-2                           | Basement Membrane  | Glycoprotein     | lama2       | 4.0                                 |                 | 3.5             | 4.1                     | 5.1             | 5.4             |
| Laminin Beta-2                            | Basement Membrane  | Glycoprotein     | lamb2       |                                     |                 |                 |                         | 2.9             | 2.1             |
| Laminin Gamma-2                           | Basement Membrane  | Glycoprotein     | lamc1       |                                     | 1.3             |                 | 1.2                     | 0.8             | 0.5             |
| Myosin(Myosin-3,4,6,7)                    | Cytoskeletal       | Glycoprotein     | myh         | 473.7                               | 511.5           | 653.2           | 607.4                   | 659.6           | 1339.3          |
| Lumican                                   | Structural ECM     | Proteoglycan     | lum         | 1.7                                 |                 |                 | 2.4                     | 1.8             | 2.7             |
| Mimecan/Osteoglycin                       | Other ECM          | Proteoglycan     | ogn         |                                     |                 |                 | 4.6                     | 4.0             | 2.3             |
| Perlecan                                  | Basement Membrane  | Proteoglycan     | hspg2       |                                     | 2.1             | 12.5            | 24.1                    | 21.1            | 8.8             |
| <b>Total Quantified Protein (fmol/mg)</b> |                    |                  |             | <b>2108.0</b>                       | <b>2038.6</b>   | <b>2060.6</b>   | <b>3411.8</b>           | <b>3418.9</b>   | <b>3391.6</b>   |

|                                                       |                    |                  |             | <b>Quantified protein (fmol/mg)</b> |                |                |                         |                |                |
|-------------------------------------------------------|--------------------|------------------|-------------|-------------------------------------|----------------|----------------|-------------------------|----------------|----------------|
|                                                       |                    |                  |             | <b>CNBr</b>                         |                |                | <b>NH<sub>2</sub>OH</b> |                |                |
| <b>Liver</b>                                          |                    |                  |             | <i>Liver 1</i>                      | <i>Liver 2</i> | <i>Liver 3</i> | <i>Liver 1</i>          | <i>Liver 2</i> | <i>Liver 3</i> |
| <b>Protein</b>                                        | <b>Functional</b>  | <b>Matrisome</b> | <b>Gene</b> |                                     |                |                |                         |                |                |
| Actin (All Isoforms)                                  | Cytoskeletal       | Cellular         | act         | 311.9                               | 888.8          | 606.9          | 2370.0                  | 1459.8         | 825.8          |
| Actin, cytoplasmic 1/2                                | Cytoskeletal       | Cellular         | actb        | 137.0                               | 303.4          | 274.6          | 439.4                   | 351.5          | 610.6          |
| Desmin                                                | Cytoskeletal       | Cellular         | des         | 4.6                                 | 6.6            | 6.5            | 6.5                     | 7.3            | 7.1            |
| Histone 2A(H2A-A-K)                                   | Other Cellular     | Cellular         | h2a         | 17.5                                | 51.4           | 44.0           |                         |                |                |
| Plectin                                               | Cytoskeletal       | Cellular         | tubb        | 15.4                                | 21.6           | 26.3           | 55.6                    | 59.9           | 73.5           |
| Tubulin beta-4B chain(4b & 5 chain)                   | Cytoskeletal       | Cellular         | vim         | 6.4                                 | 8.8            | 8.6            | 10.6                    | 13.8           | 19.3           |
| Vimentin                                              | Cytoskeletal       | Cellular         | myh         | 18.0                                | 51.7           | 29.8           | 605.1                   | 387.9          | 253.6          |
| Collagen alpha-1(I) chain                             | Fibrillar Collagen | Collagen         | col1a1      | 478.8                               | 334.8          | 218.2          | 395.6                   | 586.4          | 706.6          |
| Collagen alpha-1(I) chain(C-term Propeptides (NC1 Dom | Fibrillar Collagen | Collagen         | col1a1      | 208.9                               | 141.3          | 152.0          | 414.6                   | 648.5          | 785.7          |
| Collagen alpha-1(IV) chain(Arresten/Core Protein)     | Basement Membrane  | Collagen         | col4a1      | 25.5                                | 30.9           | 26.9           | 87.0                    | 82.2           | 108.2          |
| Collagen alpha-1(VI) chain                            | Structural ECM     | Collagen         | col6a1      | 72.0                                | 59.8           | 61.2           | 148.4                   | 195.6          | 231.6          |
| Collagen alpha-1(XIV) chain                           | FACIT Collagen     | Collagen         | col14a1     | 4.7                                 | 6.4            | 8.3            | 90.8                    | 91.8           | 154.3          |
| Collagen alpha-2(I) chain                             | Fibrillar Collagen | Collagen         | col1a2      | 235.2                               | 207.5          | 150.0          | 805.9                   | 957.9          | 1179.5         |
| Collagen alpha-2(IV) chain(Canstatin/Core Protein)    | Basement Membrane  | Collagen         | col4a2      | 17.1                                | 23.7           | 21.5           | 83.4                    | 66.8           | 120.4          |
| Collagen alpha-2(V) chain                             | Fibrillar Collagen | Collagen         | col5a2      | 2.8                                 | 2.7            | 2.4            | 10.0                    | 9.9            | 15.4           |
| Collagen alpha-2(VI) chain                            | Structural ECM     | Collagen         | col6a2      | 87.0                                | 99.7           | 82.0           | 180.3                   | 198.3          | 249.5          |
| Collagen alpha-3(VI) chain                            | Structural ECM     | Collagen         | col6a3      | 55.5                                | 57.1           | 74.7           | 203.9                   | 228.5          | 310.0          |
| Transglutaminase 2                                    | ECM regulator      | ECM regulator    | tgm2        | 3.7                                 | 6.0            | 6.9            | 25.4                    | 23.0           | 45.2           |
| Galectin-3                                            | Other ECM          | ECM-affiliated   | lgals3      | 3.3                                 | 0.7            | 9.4            |                         |                |                |
| Emilin 1                                              | Matricellular      | Glycoprotein     | emilin1     | 2.2                                 | 2.4            | 3.3            | 2.7                     | 2.6            | 5.0            |
| Fibrillin 1                                           | Structural ECM     | Glycoprotein     | fn1         | 6.7                                 | 7.9            | 9.6            | 13.3                    | 10.0           | 8.2            |
| Fibronectin 1(type-III 9 domain)                      | Structural ECM     | Glycoprotein     | fn1         | 13.5                                | 17.3           | 21.2           | 145.8                   | 120.5          | 192.1          |

|                                                     |                   |              |       |               |               |               |               |               |               |
|-----------------------------------------------------|-------------------|--------------|-------|---------------|---------------|---------------|---------------|---------------|---------------|
| Fibulin 1                                           | Matricellular     | Glycoprotein | fbln1 | 0.6           | 0.1           | 1.6           |               |               |               |
| Laminin Beta-2                                      | Basement Membrane | Glycoprotein | hspg2 | 6.8           | 11.8          | 11.1          | 42.7          | 38.6          | 67.6          |
| Myosin(Myosin-3,4,6,7)                              | Cytoskeletal      | Glycoprotein | plec  | 1.1           | 1.3           | 1.9           | 11.2          | 6.4           | 14.3          |
| Biglycan                                            | Structural ECM    | Proteoglycan | bgn   |               |               |               | 4.8           | 3.0           | 5.8           |
| Bone Marrow Proteoglycan(BMP & Eosinophil granule m | Other ECM         | Proteoglycan | prg2  |               |               |               | 4.8           | 3.0           | 5.8           |
| Lumican                                             | Structural ECM    | Proteoglycan | lum   | 2.1           | 2.8           | 3.3           | 2.5           | 2.5           | 3.6           |
| Perlecan(Endorepellin)                              | Basement Membrane | Proteoglycan | lamb2 | 1.3           | 2.5           | 1.4           | 2.9           | 3.0           | 4.6           |
| <b>Total Quantified Protein (fmol/mg)</b>           |                   |              |       | <b>1739.5</b> | <b>2349.1</b> | <b>1963.8</b> | <b>6163.3</b> | <b>5558.5</b> | <b>6003.3</b> |

Supplementary Table S3 - Fold change analysis of ECM protein groups from LC-SRM data

|                                                     |                 | Cellular<br>(fmol/mg) | Collagen<br>(fmol/mg) | Glycoprotein<br>(fmol/mg) | Proteoglycan<br>(fmol/mg) |
|-----------------------------------------------------|-----------------|-----------------------|-----------------------|---------------------------|---------------------------|
| <b>CNBr</b>                                         | <i>Bone 1</i>   | 136.7                 | 22578.3               | 153.5                     | 160.2                     |
|                                                     | <i>Bone 2</i>   | 90.1                  | 21985.2               | 148.1                     | 100.3                     |
|                                                     | <i>Bone 3</i>   | 110.3                 | 18564.1               | 126.0                     | 120.8                     |
| <b>NH<sub>2</sub>OH</b>                             | <i>Bone 1</i>   | 532.9                 | 15761.5               | 428.8                     | 156.0                     |
|                                                     | <i>Bone 2</i>   | 550.9                 | 13228.5               | 182.5                     | 62.6                      |
|                                                     | <i>Bone 3</i>   | 441.8                 | 16945.3               | 115.7                     | 73.8                      |
| <b>Bone Fold Change<br/>NH<sub>2</sub>OH/CNBr</b>   |                 | <b>4.5</b>            | <b>0.7</b>            | <b>1.7</b>                | <b>0.8</b>                |
| <b>CNBr</b>                                         | <i>Skin 1</i>   | 208.6                 | 6996.2                | 141.2                     | 54.9                      |
|                                                     | <i>Skin 2</i>   | 131.6                 | 4026.2                | 47.4                      | 41.0                      |
|                                                     | <i>Skin 3</i>   | 115.0                 | 4725.4                | 202.6                     | 15.4                      |
| <b>NH<sub>2</sub>OH</b>                             | <i>Skin 1</i>   | 351.0                 | 5966.5                | 185.1                     | 40.2                      |
|                                                     | <i>Skin 2</i>   | 343.4                 | 5839.6                | 112.7                     | 47.1                      |
|                                                     | <i>Skin 3</i>   | 400.1                 | 6247.5                | 168.6                     | 43.6                      |
| <b>Skin Fold Change<br/>NH<sub>2</sub>OH/CNBr</b>   |                 | <b>2.4</b>            | <b>1.1</b>            | <b>1.2</b>                | <b>1.2</b>                |
| <b>CNBr</b>                                         | <i>Lung 1</i>   | 156.3                 | 2553.2                | 102.9                     | 56.3                      |
|                                                     | <i>Lung 2</i>   | 218.0                 | 2037.4                | 183.9                     | 74.7                      |
|                                                     | <i>Lung 3</i>   | 249.1                 | 1651.3                | 141.8                     | 51.8                      |
| <b>NH<sub>2</sub>OH</b>                             | <i>Lung 1</i>   | 209.5                 | 2992.6                | 546.9                     | 140.7                     |
|                                                     | <i>Lung 2</i>   | 285.9                 | 2864.4                | 527.7                     | 117.4                     |
|                                                     | <i>Lung 3</i>   | 211.8                 | 2921.3                | 467.9                     | 131.3                     |
| <b>Lung Fold Change<br/>NH<sub>2</sub>OH/CNBr</b>   |                 | <b>1.1</b>            | <b>1.4</b>            | <b>3.6</b>                | <b>2.1</b>                |
| <b>CNBr</b>                                         | <i>Muscle 1</i> | 626.4                 | 1002.2                | 477.7                     | 1.7                       |
|                                                     | <i>Muscle 2</i> | 197.0                 | 1326.6                | 512.8                     | 2.1                       |
|                                                     | <i>Muscle 3</i> | 499.1                 | 892.2                 | 656.7                     | 12.5                      |
| <b>NH<sub>2</sub>OH</b>                             | <i>Muscle 1</i> | 982.0                 | 1776.8                | 621.8                     | 31.1                      |
|                                                     | <i>Muscle 2</i> | 999.4                 | 1714.3                | 678.3                     | 26.8                      |
|                                                     | <i>Muscle 3</i> | 666.3                 | 1357.8                | 1353.7                    | 13.8                      |
| <b>Muscle Fold Change<br/>NH<sub>2</sub>OH/CNBr</b> |                 | <b>2.0</b>            | <b>1.5</b>            | <b>1.6</b>                | <b>4.4</b>                |
| <b>CNBr</b>                                         | <i>Liver 1</i>  | 510.7                 | 1187.6                | 30.8                      | 3.4                       |
|                                                     | <i>Liver 2</i>  | 1332.3                | 963.8                 | 41.0                      | 5.3                       |
|                                                     | <i>Liver 3</i>  | 996.8                 | 897.3                 | 48.8                      | 4.7                       |
| <b>NH<sub>2</sub>OH</b>                             | <i>Liver 1</i>  | 3487.1                | 2419.9                | 215.7                     | 10.3                      |
|                                                     | <i>Liver 2</i>  | 2280.1                | 3065.9                | 178.1                     | 8.5                       |
|                                                     | <i>Liver 3</i>  | 1789.8                | 3861.1                | 287.3                     | 14.0                      |
| <b>Liver Fold Change<br/>NH<sub>2</sub>OH/CNBr</b>  |                 | <b>2.7</b>            | <b>3.1</b>            | <b>5.6</b>                | <b>2.5</b>                |
| <b>All Tissues Average<br/>Fold Change</b>          |                 | <b>2.5</b>            | <b>1.6</b>            | <b>2.8</b>                | <b>2.2</b>                |

\* Fold Change for each tissue is calculated by dividing the average of three replicates for NH<sub>2</sub>OH and dividing by the average of three replicates for CNBr

Supplementary Tables S4 - Data-dependent LC-MS/MS Results

| Bone                                                      | Identified Proteins | Gene        | Accession Number | Molecular Weight | Peptide Spectral Matches (PSM) |         |         |                    |         |         |
|-----------------------------------------------------------|---------------------|-------------|------------------|------------------|--------------------------------|---------|---------|--------------------|---------|---------|
|                                                           |                     |             |                  |                  | CNBr                           |         |         | NH <sub>2</sub> OH |         |         |
|                                                           |                     |             |                  |                  | Femur 1                        | Femur 2 | Femur 3 | Femur 1            | Femur 2 | Femur 3 |
| Collagen alpha-2(I) chain                                 | Col1a2              | CO1A2_MOUSE | 130 kDa          | 489              | 473                            | 446     | 419     | 333                | 447     |         |
| Collagen alpha-1(I) chain                                 | Col1a1              | CO1A1_MOUSE | 138 kDa          | 512              | 465                            | 469     | 430     | 446                | 430     |         |
| Sarcoplasmic/endoplasmic reticulum chaperone              | Atp2a1              | AT2A1_MOUSE | 109 kDa          | 68               | 80                             | 77      | 139     | 134                | 125     |         |
| Collagen alpha-1(III) chain                               | Col3a1              | CO3A1_MOUSE | 139 kDa          | 101              | 124                            | 81      | 97      | 73                 | 114     |         |
| Myosin-1                                                  | Myh1                | MYH1_MOUSE  | 223 kDa          | 33               | 60                             | 51      | 69      | 71                 | 112     |         |
| Alpha-actinin-3                                           | Actn3               | ACTN3_MOUSE | 103 kDa          | 18               | 27                             | 24      | 70      | 63                 | 82      |         |
| Collagen alpha-1(XII) chain                               | Col12a1             | COCA1_MOUSE | 340 kDa          | 96               | 61                             | 69      | 75      | 21                 | 74      |         |
| Collagen alpha-1(II) chain                                | Col2a1              | CO2A1_MOUSE | 142 kDa          | 106              | 145                            | 132     | 214     | 69                 | 69      |         |
| Alpha-actinin-2                                           | Actn2               | ACTN2_MOUSE | 104 kDa          | 6                | 17                             | 9       | 37      | 34                 | 43      |         |
| Filamin-C                                                 | Flnc                | FLNC_MOUSE  | 291 kDa          | 3                | 6                              | 4       | 30      | 12                 | 37      |         |
| Actin, alpha skeletal muscle                              | Acta1               | ACTS_MOUSE  | 42 kDa           | 18               | 14                             | 19      | 38      | 39                 | 36      |         |
| ADP/ATP translocase 1                                     | Slc25a4             | ADT1_MOUSE  | 33 kDa           | 9                | 17                             | 13      | 36      | 23                 | 32      |         |
| Collagen alpha-1(VI) chain                                | Col6a1              | CO6A1_MOUSE | 108 kDa          | 50               | 43                             | 51      | 28      | 11                 | 27      |         |
| Collagen alpha-2(V) chain                                 | Col5a2              | CO5A2_MOUSE | 145 kDa          | 27               | 32                             | 26      | 30      | 20                 | 26      |         |
| Myosin-7                                                  | Myh7                | MYH7_MOUSE  | 223 kDa          | 7                | 14                             | 7       | 26      | 15                 | 23      |         |
| Alpha-2-HS-glycoprotein                                   | Ahsg                | FETUA_MOUSE | 37 kDa           | 44               | 64                             | 48      | 24      | 13                 | 22      |         |
| Plectin                                                   | Plec                | PLEC_MOUSE  | 534 kDa          | 0                | 3                              | 1       | 21      | 3                  | 21      |         |
| Collagen alpha-2(XI) chain                                | Col11a2             | COBA2_MOUSE | 172 kDa          | 19               | 22                             | 21      | 32      | 8                  | 16      |         |
| Cytochrome c oxidase subunit 2                            | Mtco2               | COX2_MOUSE  | 26 kDa           | 0                | 0                              | 0       | 11      | 6                  | 15      |         |
| Fibronectin                                               | Fn1                 | FINC_MOUSE  | 273 kDa          | 12               | 16                             | 8       | 27      | 1                  | 15      |         |
| Collagen alpha-2(VI) chain                                | Col6a2              | CO6A2_MOUSE | 110 kDa          | 19               | 21                             | 22      | 14      | 5                  | 15      |         |
| Keratin, type I cytoskeletal 10                           | Krt10               | K1C10_MOUSE | 58 kDa           | 2                | 2                              | 2       | 3       | 0                  | 13      |         |
| Tubulin alpha-1C chain                                    | Tuba1c              | TBA1C_MOUSE | 50 kDa           | 4                | 6                              | 1       | 9       | 4                  | 11      |         |
| AMP deaminase 1                                           | Ampd1               | AMPD1_MOUSE | 86 kDa           | 1                | 2                              | 0       | 6       | 2                  | 10      |         |
| Collagen alpha-1(IX) chain                                | Col9a1              | CO9A1_MOUSE | 92 kDa           | 17               | 19                             | 19      | 36      | 4                  | 10      |         |
| Periostin                                                 | Postn               | POSTN_MOUSE | 93 kDa           | 50               | 30                             | 27      | 4       | 0                  | 10      |         |
| Biglycan                                                  | Bgn                 | PGS1_MOUSE  | 42 kDa           | 42               | 49                             | 45      | 22      | 0                  | 10      |         |
| Cartilage intermediate layer protein 1                    | Cilp2               | CILP2_MOUSE | 126 kDa          | 17               | 12                             | 19      | 9       | 4                  | 9       |         |
| Tubulin beta-5 chain                                      | Tubb5               | TBB5_MOUSE  | 50 kDa           | 0                | 2                              | 0       | 9       | 3                  | 8       |         |
| Vimentin                                                  | Vim                 | VIME_MOUSE  | 54 kDa           | 9                | 11                             | 4       | 9       | 0                  | 8       |         |
| Collagen alpha-1(XI) chain                                | Col11a1             | COBA1_MOUSE | 181 kDa          | 12               | 14                             | 15      | 13      | 8                  | 8       |         |
| Voltage-dependent anion-selective chloride channel 1      | Vdac1               | VDAC1_MOUSE | 32 kDa           | 2                | 1                              | 2       | 7       | 2                  | 7       |         |
| Myosin light chain 1/3, skeletal muscle                   | Myf1                | MYL1_MOUSE  | 21 kDa           | 12               | 7                              | 19      | 8       | 11                 | 7       |         |
| Myosin-8                                                  | Myh8                | MYH8_MOUSE  | 223 kDa          | 0                | 4                              | 0       | 1       | 3                  | 6       |         |
| Desmin                                                    | Des                 | DESM_MOUSE  | 53 kDa           | 2                | 2                              | 4       | 3       | 0                  | 6       |         |
| Reticulon-2                                               | Rtn2                | RTN2_MOUSE  | 51 kDa           | 3                | 2                              | 2       | 6       | 2                  | 6       |         |
| Myomesin-1                                                | Myom1               | MYOM1_MOUSE | 185 kDa          | 2                | 2                              | 4       | 7       | 1                  | 6       |         |
| ATP synthase subunit alpha, mitochondrial                 | Atp5a1              | ATPA_MOUSE  | 60 kDa           | 2                | 2                              | 4       | 7       | 2                  | 6       |         |
| Prothrombin                                               | F2                  | THRB_MOUSE  | 70 kDa           | 11               | 17                             | 16      | 5       | 1                  | 6       |         |
| Titin                                                     | Ttn                 | TITIN_MOUSE | 3906 kDa         | 124              | 275                            | 163     | 1164    | 827                | 1228    |         |
| Myosin-4                                                  | Myh4                | MYH4_MOUSE  | 223 kDa          | 252              | 292                            | 284     | 477     | 542                | 493     |         |
| Laminin subunit alpha-2                                   | Lama2               | LAMA2_MOUSE | 344 kDa          | 0                | 0                              | 0       | 4       | 0                  | 5       |         |
| Fibrillin-1                                               | Fbn1                | FBN1_MOUSE  | 312 kDa          | 0                | 0                              | 2       | 4       | 0                  | 5       |         |
| Vitronectin                                               | Vtn                 | VTNC_MOUSE  | 55 kDa           | 2                | 4                              | 1       | 4       | 1                  | 5       |         |
| Keratin, type II cytoskeletal 6A                          | Krt6a               | K2C6A_MOUSE | 59 kDa           | 4                | 4                              | 4       | 4       | 4                  | 5       |         |
| Basement membrane-specific heparan sulfate proteoglycan 2 | Hspg2               | PGBM_MOUSE  | 398 kDa          | 5                | 10                             | 5       | 13      | 2                  | 5       |         |
| Collagen alpha-1(IV) chain                                | Col4a1              | CO4A1_MOUSE | 161 kDa          | 0                | 0                              | 0       | 2       | 1                  | 4       |         |
| Collagen alpha-2(IV) chain                                | Col4a2              | CO4A2_MOUSE | 167 kDa          | 0                | 1                              | 1       | 1       | 0                  | 4       |         |
| Sarcoplasmic/endoplasmic reticulum chaperone              | Atp2a2              | AT2A2_MOUSE | 115 kDa          | 0                | 0                              | 0       | 2       | 2                  | 4       |         |
| Obscurin                                                  | Obscn               | OBSCN_MOUSE | 966 kDa          | 0                | 0                              | 0       | 6       | 1                  | 4       |         |
| Serpin H1                                                 | Serpinh1            | SERPH_MOUSE | 47 kDa           | 0                | 2                              | 0       | 10      | 0                  | 4       |         |
| Thrombospondin-1                                          | Thbs1               | TSP1_MOUSE  | 130 kDa          | 18               | 13                             | 17      | 10      | 1                  | 4       |         |
| Dolichyl-diphosphooligosaccharide 4-epimerase             | Rpn1                | RPN1_MOUSE  | 69 kDa           | 0                | 0                              | 1       | 2       | 0                  | 3       |         |
| ATP synthase subunit f, mitochondrial                     | Atp5j2              | ATPK_MOUSE  | 10 kDa           | 0                | 0                              | 0       | 3       | 0                  | 3       |         |
| Actin, cytoplasmic 1                                      | Actb                | ACTB_MOUSE  | 42 kDa           | 0                | 0                              | 0       | 4       | 0                  | 3       |         |
| NADH dehydrogenase [ubiquinone] 1, 1.3, 2, 4              | Ndufa9              | NDUA9_MOUSE | 43 kDa           | 0                | 0                              | 0       | 5       | 1                  | 3       |         |
| Calcium-binding mitochondrial carrier 1                   | Slc25a12            | CMC1_MOUSE  | 75 kDa           | 0                | 1                              | 0       | 4       | 1                  | 3       |         |
| Myosin regulatory light chain 2, skeletal muscle          | Mylpf               | MLRS_MOUSE  | 19 kDa           | 4                | 4                              | 7       | 2       | 2                  | 3       |         |
| Collagen alpha-2(IX) chain                                | Col9a2              | CO9A2_MOUSE | 65 kDa           | 8                | 10                             | 9       | 21      | 2                  | 3       |         |
| Chondroadherin                                            | Chad                | CHAD_MOUSE  | 40 kDa           | 11               | 17                             | 17      | 17      | 1                  | 3       |         |
| Laminin subunit gamma-1                                   | Lamc1               | LAMC1_MOUSE | 177 kDa          | 0                | 0                              | 0       | 4       | 0                  | 2       |         |
| L-lactate dehydrogenase A chain                           | Ldha                | LDHA_MOUSE  | 36 kDa           | 0                | 0                              | 0       | 3       | 2                  | 2       |         |
| Alpha-actinin-1                                           | Actn1               | ACTN1_MOUSE | 103 kDa          | 0                | 0                              | 0       | 7       | 0                  | 2       |         |

|                                     |            |             |         |    |    |    |    |   |   |
|-------------------------------------|------------|-------------|---------|----|----|----|----|---|---|
| Ubiquitin-60S ribosomal protein L4  | Uba52      | RL40_MOUSE  | 15 kDa  | 0  | 2  | 2  | 3  | 0 | 2 |
| Ryanodine receptor 1                | Ryr1       | RYR1_MOUSE  | 565 kDa | 0  | 0  | 0  | 6  | 2 | 2 |
| Osteopontin                         | Spp1       | OSTP_MOUSE  | 32 kDa  | 2  | 0  | 3  | 4  | 0 | 2 |
| Myozenin-1                          | Myoz1      | MYOZ1_MOUSE | 31 kDa  | 3  | 1  | 5  | 2  | 1 | 2 |
| Histone H4                          | Hist1h4a   | H4_MOUSE    | 11 kDa  | 2  | 1  | 2  | 8  | 0 | 2 |
| Hemoglobin subunit beta-1           | Hbb-b1     | HBB1_MOUSE  | 16 kDa  | 2  | 2  | 1  | 7  | 2 | 2 |
| Histone H2B type 1-B                | Hist1h2bb  | H2B1B_MOUSE | 14 kDa  | 4  | 3  | 3  | 5  | 0 | 2 |
| Collagen alpha-1(X) chain           | Col10a1    | COA1_MOUSE  | 67 kDa  | 3  | 6  | 4  | 16 | 0 | 2 |
| Fibromodulin                        | Fmod       | FMOD_MOUSE  | 43 kDa  | 14 | 14 | 12 | 13 | 2 | 2 |
| Clathrin heavy chain 1              | Cltc       | CLH1_MOUSE  | 192 kDa | 0  | 1  | 0  | 3  | 0 | 1 |
| Myosin-9                            | Myh9       | MYH9_MOUSE  | 226 kDa | 1  | 3  | 0  | 2  | 0 | 1 |
| Prolargin                           | Prelp      | PRELP_MOUSE | 43 kDa  | 1  | 3  | 0  | 3  | 0 | 1 |
| Aggrecan core protein               | Acan       | PGCA_MOUSE  | 222 kDa | 3  | 2  | 2  | 14 | 0 | 1 |
| Nidogen-2                           | Nid2       | NID2_MOUSE  | 154 kDa | 0  | 0  | 0  | 2  | 0 | 0 |
| Vitamin K-dependent protein S       | Pros1      | PROS_MOUSE  | 75 kDa  | 0  | 2  | 0  | 0  | 0 | 0 |
| Keratin, type II cuticular Hb4      | Krt84      | KRT84_MOUSE | 65 kDa  | 0  | 3  | 0  | 0  | 0 | 0 |
| Olfactomedin-like protein 3         | Olfml3     | OLFL3_MOUSE | 46 kDa  | 1  | 0  | 3  | 0  | 0 | 0 |
| ATP synthase subunit a              | Mtstp6     | ATP6_MOUSE  | 25 kDa  | 0  | 3  | 1  | 0  | 0 | 0 |
| Decorin                             | Dcn        | PGS2_MOUSE  | 40 kDa  | 1  | 3  | 0  | 1  | 0 | 0 |
| Myosin-11                           | Myh11      | MYH11_MOUSE | 227 kDa | 0  | 5  | 0  | 0  | 0 | 0 |
| Hemoglobin subunit alpha            | Hba        | HBA_MOUSE   | 15 kDa  | 0  | 1  | 0  | 4  | 0 | 0 |
| Collagen alpha-1(V) chain           | Col5a1     | CO5A1_MOUSE | 184 kDa | 2  | 1  | 0  | 1  | 2 | 0 |
| Eosinophil peroxidase               | Epx        | PERE_MOUSE  | 81 kDa  | 0  | 3  | 0  | 3  | 0 | 0 |
| Keratin, type II cytoskeletal 1b    | Krt77      | K2C1B_MOUSE | 61 kDa  | 0  | 4  | 0  | 2  | 0 | 0 |
| Sushi-repeat-containing protein SF  | SrpX       | SRPX_MOUSE  | 52 kDa  | 0  | 4  | 0  | 2  | 0 | 0 |
| Alpha-1-antitrypsin 1-4             | Serpina1d  | A1AT4_MOUSE | 46 kDa  | 1  | 2  | 4  | 0  | 0 | 0 |
| Pyruvate kinase PKM                 | Pkm        | KPYM_MOUSE  | 58 kDa  | 0  | 0  | 0  | 7  | 0 | 0 |
| Elongation factor 1-alpha 1         | Eef1a1     | EF1A1_MOUSE | 50 kDa  | 0  | 1  | 0  | 6  | 0 | 0 |
| Myelin protein P0                   | Mpz        | MYP0_MOUSE  | 28 kDa  | 4  | 1  | 1  | 2  | 0 | 0 |
| Osteomodulin                        | Omd        | OMD_MOUSE   | 50 kDa  | 2  | 4  | 2  | 0  | 0 | 0 |
| Hyaluronan and proteoglycan link    | Hapl1      | HPLN1_MOUSE | 40 kDa  | 0  | 2  | 0  | 7  | 0 | 0 |
| Apolipoprotein A-I                  | Apoa1      | APOA1_MOUSE | 31 kDa  | 3  | 1  | 6  | 0  | 0 | 0 |
| Histone H2A type 2-A                | Hist2h2aa1 | H2A2A_MOUSE | 14 kDa  | 0  | 3  | 2  | 5  | 0 | 0 |
| Lumican                             | Lum        | LUM_MOUSE   | 38 kDa  | 7  | 2  | 2  | 0  | 0 | 0 |
| Lactadherin                         | Mfge8      | MFGM_MOUSE  | 51 kDa  | 1  | 9  | 6  | 2  | 0 | 0 |
| Matrilin-3                          | Matn3      | MATN3_MOUSE | 52 kDa  | 4  | 5  | 1  | 10 | 0 | 0 |
| Pigment epithelium-derived factor   | Serpinf1   | PEDF_MOUSE  | 46 kDa  | 8  | 12 | 9  | 1  | 0 | 0 |
| Cartilage oligomeric matrix protein | Comp       | COMP_MOUSE  | 82 kDa  | 5  | 10 | 8  | 12 | 0 | 0 |
| Cartilage matrix protein            | Matn1      | MATN1_MOUSE | 54 kDa  | 6  | 17 | 4  | 27 | 0 | 0 |
| SPARC                               | Sparc      | SPRC_MOUSE  | 34 kDa  | 13 | 26 | 16 | 13 | 0 | 0 |
| Serum albumin                       | Alb        | ALBU_MOUSE  | 69 kDa  | 19 | 20 | 27 | 8  | 0 | 0 |

| Skin                                         |          |                  |                  | CNBr   |        |        | NH <sub>2</sub> OH |        |        |
|----------------------------------------------|----------|------------------|------------------|--------|--------|--------|--------------------|--------|--------|
| Identified Proteins                          | Gene     | Accession Number | Molecular Weight | Skin 1 | Skin 2 | Skin 3 | Skin 1             | Skin 2 | Skin 3 |
| Collagen alpha-1(I) chain                    | Col1a1   | CO1A1_MOUSE      | 138 kDa          | 384    | 394    | 294    | 461                | 455    | 316    |
| Collagen alpha-1(III) chain                  | Col3a1   | CO3A1_MOUSE      | 139 kDa          | 311    | 298    | 214    | 335                | 335    | 231    |
| Collagen alpha-2(I) chain                    | Col1a2   | CO1A2_MOUSE      | 130 kDa          | 293    | 294    | 196    | 353                | 349    | 216    |
| Myosin-4                                     | Myh4     | MYH4_MOUSE       | 223 kDa          | 133    | 54     | 93     | 242                | 181    | 90     |
| Myosin-1                                     | Myh1     | MYH1_MOUSE       | 223 kDa          | 30     | 7      | 16     | 72                 | 47     | 33     |
| Keratin, type II cytoskeletal 1b             | Krt77    | K2C1B_MOUSE      | 61 kDa           | 49     | 65     | 12     | 53                 | 81     | 31     |
| Keratin, type I cuticular Ha3-II             | Krt33b   | KT33B_MOUSE      | 46 kDa           | 1      | 3      | 0      | 22                 | 15     | 30     |
| Actin, alpha skeletal muscle                 | Acta1    | ACTS_MOUSE       | 42 kDa           | 19     | 16     | 5      | 62                 | 54     | 30     |
| Collagen alpha-1(VI) chain                   | Col6a1   | CO6A1_MOUSE      | 108 kDa          | 50     | 61     | 4      | 38                 | 45     | 27     |
| Sarcoplasmic/endoplasmic reticulum chaperone | Atp2a1   | AT2A1_MOUSE      | 109 kDa          | 57     | 16     | 30     | 73                 | 44     | 27     |
| Keratin, type I cuticular Ha4                | Krt34    | KRT34_MOUSE      | 45 kDa           | 2      | 6      | 0      | 13                 | 13     | 19     |
| Keratin, type II cuticular Hb4               | Krt84    | KRT84_MOUSE      | 65 kDa           | 39     | 51     | 4      | 32                 | 41     | 19     |
| Alpha-actinin-3                              | Actn3    | ACTN3_MOUSE      | 103 kDa          | 11     | 0      | 3      | 43                 | 25     | 14     |
| Keratin, type I cytoskeletal 10              | Krt10    | K1C10_MOUSE      | 58 kDa           | 45     | 68     | 18     | 29                 | 41     | 14     |
| Fibrillin-1                                  | Fbn1     | FBN1_MOUSE       | 312 kDa          | 38     | 36     | 5      | 36                 | 33     | 13     |
| Histone H4                                   | Hist1h4a | H4_MOUSE         | 11 kDa           | 5      | 10     | 1      | 16                 | 18     | 12     |
| Collagen alpha-2(VI) chain                   | Col6a2   | CO6A2_MOUSE      | 110 kDa          | 18     | 24     | 3      | 34                 | 46     | 11     |
| Tubulin beta-5 chain                         | Tubb5    | TBB5_MOUSE       | 50 kDa           | 2      | 3      | 0      | 20                 | 21     | 10     |
| Keratin, type I cytoskeletal 15              | Krt15    | K1C15_MOUSE      | 49 kDa           | 9      | 16     | 2      | 14                 | 19     | 10     |
| Alpha-actinin-2                              | Actn2    | ACTN2_MOUSE      | 104 kDa          | 11     | 0      | 1      | 32                 | 23     | 10     |
| ADP/ATP translocase 1                        | Slc25a4  | ADT1_MOUSE       | 33 kDa           | 16     | 13     | 2      | 27                 | 21     | 10     |
| Keratin, type I cytoskeletal 14              | Krt14    | K1C14_MOUSE      | 53 kDa           | 18     | 33     | 5      | 36                 | 34     | 10     |
| Keratin-associated protein 3-2               | Krtap3-2 | KRA32_MOUSE      | 11 kDa           | 0      | 1      | 0      | 5                  | 3      | 9      |



|                                                           |           |             |          |    |    |   |     |     |   |
|-----------------------------------------------------------|-----------|-------------|----------|----|----|---|-----|-----|---|
| Myelin protein P0                                         | Mpz       | MYP0_MOUSE  | 28 kDa   | 11 | 6  | 1 | 17  | 13  | 9 |
| Desmoplakin                                               | Dsp       | DESP_MOUSE  | 333 kDa  | 15 | 43 | 0 | 30  | 73  | 8 |
| Keratin-associated protein 7-1                            | Krtap7-1  | KRA71_MOUSE | 10 kDa   | 0  | 0  | 0 | 5   | 5   | 7 |
| Histone H2B type 1-B                                      | Hist1h2bb | H2B1B_MOUSE | 14 kDa   | 13 | 12 | 3 | 8   | 12  | 7 |
| Keratin, type I cytoskeletal 17                           | Krt17     | K1C17_MOUSE | 48 kDa   | 15 | 16 | 1 | 14  | 20  | 7 |
| Tubulin alpha-1C chain                                    | Tuba1c    | TBA1C_MOUSE | 50 kDa   | 9  | 17 | 3 | 22  | 30  | 7 |
| Dual specificity protein phosphatase                      | Dusp14    | DUS14_MOUSE | 22 kDa   | 0  | 0  | 0 | 1   | 1   | 6 |
| Filaggrin-2                                               | Flg2      | FILA2_MOUSE | 251 kDa  | 15 | 23 | 3 | 9   | 12  | 6 |
| Vimentin                                                  | Vim       | VIME_MOUSE  | 54 kDa   | 11 | 21 | 5 | 17  | 18  | 6 |
| Keratin, type I cytoskeletal 16                           | Krt16     | K1C16_MOUSE | 52 kDa   | 14 | 22 | 4 | 14  | 21  | 6 |
| Keratin, type II cytoskeletal 6A                          | Krt6a     | K2C6A_MOUSE | 59 kDa   | 16 | 21 | 2 | 16  | 21  | 6 |
| Keratin, type I cuticular Ha5                             | Krt35     | KRT35_MOUSE | 51 kDa   | 0  | 6  | 0 | 1   | 2   | 5 |
| Keratin, type II cytoskeletal 79                          | Krt79     | K2C79_MOUSE | 58 kDa   | 6  | 9  | 2 | 15  | 20  | 5 |
| Asporin                                                   | Aspn      | ASPN_MOUSE  | 43 kDa   | 7  | 17 | 0 | 16  | 21  | 5 |
| Titin                                                     | Ttn       | TITIN_MOUSE | 3906 kDa | 28 | 0  | 2 | 337 | 102 | 5 |
| Keratin-associated protein 15-1                           | Krtap15-1 | KR151_MOUSE | 16 kDa   | 0  | 0  | 0 | 3   | 2   | 4 |
| Keratin-associated protein 6-5                            | Krtap6-5  | KRA65_MOUSE | 8 kDa    | 0  | 0  | 0 | 4   | 4   | 4 |
| Junction plakoglobin                                      | Jup       | PLAK_MOUSE  | 82 kDa   | 8  | 12 | 0 | 12  | 24  | 4 |
| Elastin                                                   | Eln       | ELN_MOUSE   | 72 kDa   | 4  | 8  | 0 | 7   | 3   | 3 |
| Histone H2A type 1-F                                      | Hist1h2af | H2A1F_MOUSE | 14 kDa   | 3  | 5  | 0 | 6   | 9   | 3 |
| Galectin-7                                                | Lgals7    | LEG7_MOUSE  | 15 kDa   | 3  | 10 | 2 | 6   | 7   | 3 |
| Actin, cytoplasmic 1                                      | Actb      | ACTB_MOUSE  | 42 kDa   | 2  | 3  | 0 | 11  | 14  | 3 |
| Epiplakin                                                 | Eppk1     | EPIPL_MOUSE | 725 kDa  | 4  | 6  | 0 | 9   | 17  | 3 |
| Myosin-8                                                  | Myh8      | MYH8_MOUSE  | 223 kDa  | 0  | 0  | 0 | 0   | 0   | 2 |
| Microfibril-associated glycoprotein                       | Mfap4     | MFAP4_MOUSE | 29 kDa   | 0  | 0  | 0 | 2   | 2   | 2 |
| Protein FAM26D                                            | Fam26d    | FA26D_MOUSE | 35 kDa   | 0  | 0  | 0 | 2   | 3   | 2 |
| Keratin, type II cuticular Hb2                            | Krt82     | KRT82_MOUSE | 57 kDa   | 0  | 3  | 0 | 2   | 4   | 2 |
| Fibulin-5                                                 | Fbln5     | FBLN5_MOUSE | 50 kDa   | 0  | 1  | 0 | 4   | 7   | 2 |
| Basement membrane-specific heparan sulfate proteoglycan 2 | Hspg2     | PGBM_MOUSE  | 398 kDa  | 1  | 1  | 0 | 2   | 9   | 2 |
| Keratin, type I cytoskeletal 13                           | Krt13     | K1C13_MOUSE | 48 kDa   | 0  | 2  | 0 | 7   | 7   | 2 |
| Keratin, type II cytoskeletal 8                           | Krt8      | K2C8_MOUSE  | 55 kDa   | 4  | 7  | 0 | 5   | 5   | 2 |
| Laminin subunit gamma-1                                   | Lamc1     | LAMC1_MOUSE | 177 kDa  | 3  | 7  | 0 | 6   | 5   | 2 |
| Ubiquitin-60S ribosomal protein L4                        | Uba52     | RL40_MOUSE  | 15 kDa   | 3  | 7  | 0 | 4   | 8   | 2 |
| Decorin                                                   | Dcn       | PGS2_MOUSE  | 40 kDa   | 13 | 19 | 0 | 6   | 8   | 2 |
| Keratin, type I cuticular Ha2                             | Krt32     | K1H2_MOUSE  | 46 kDa   | 0  | 0  | 0 | 1   | 2   | 1 |
| Cytochrome c oxidase subunit 2                            | Mtco2     | COX2_MOUSE  | 26 kDa   | 0  | 0  | 0 | 6   | 6   | 1 |
| Desmoglein-1-alpha                                        | Dsg1a     | DSG1A_MOUSE | 115 kDa  | 0  | 4  | 0 | 2   | 7   | 1 |
| ADP/ATP translocase 2                                     | Slc25a5   | ADT2_MOUSE  | 33 kDa   | 2  | 4  | 1 | 3   | 4   | 1 |
| Collagen alpha-1(II) chain                                | Col2a1    | CO2A1_MOUSE | 142 kDa  | 3  | 4  | 3 | 4   | 3   | 1 |
| Histidine ammonia-lyase                                   | Hal       | HUTH_MOUSE  | 72 kDa   | 2  | 7  | 0 | 0   | 9   | 1 |
| Collagen alpha-1(IV) chain                                | Col4a1    | CO4A1_MOUSE | 161 kDa  | 2  | 2  | 0 | 7   | 8   | 1 |
| Collagen alpha-1(XIV) chain                               | Col14a1   | COEA1_MOUSE | 193 kDa  | 2  | 3  | 0 | 6   | 10  | 1 |
| 14-3-3 protein sigma                                      | Sfn       | 1433S_MOUSE | 28 kDa   | 2  | 6  | 0 | 8   | 8   | 1 |
| Clathrin heavy chain 1                                    | Cltc      | CLH1_MOUSE  | 192 kDa  | 9  | 15 | 0 | 4   | 6   | 1 |
| Lumican                                                   | Lum       | LUM_MOUSE   | 38 kDa   | 15 | 16 | 2 | 6   | 8   | 1 |
| Keratin, type II cytoskeletal 1                           | Krt1      | K2C1_MOUSE  | 66 kDa   | 9  | 16 | 3 | 14  | 15  | 1 |
| Periaxin                                                  | Prx       | PRAX_MOUSE  | 148 kDa  | 1  | 0  | 0 | 0   | 0   | 0 |
| Myosin-7                                                  | Myh7      | MYH7_MOUSE  | 223 kDa  | 0  | 0  | 0 | 1   | 0   | 0 |
| Collagen alpha-4(IV) chain                                | Col4a4    | CO4A4_MOUSE | 164 kDa  | 0  | 1  | 0 | 0   | 0   | 0 |
| Fatty acid synthase                                       | Fasn      | FAS_MOUSE   | 272 kDa  | 0  | 1  | 0 | 0   | 0   | 0 |
| Tricarboxylate transport protein, mitochondrial           | Slc25a1   | TXTP_MOUSE  | 34 kDa   | 0  | 0  | 0 | 0   | 1   | 0 |
| Mitochondrial amidoxime reducing component 2              | 2-Mar     | MARC2_MOUSE | 38 kDa   | 0  | 1  | 0 | 0   | 0   | 0 |
| Prohibitin-2                                              | Phb2      | PHB2_MOUSE  | 33 kDa   | 0  | 0  | 0 | 0   | 1   | 0 |
| Prohibitin                                                | Phb       | PHB_MOUSE   | 30 kDa   | 0  | 0  | 0 | 0   | 1   | 0 |
| Heat shock cognate 71 kDa protein                         | Hspa8     | HSP7C_MOUSE | 71 kDa   | 0  | 0  | 0 | 0   | 1   | 0 |
| Keratin, type II cytoskeletal 2 epidermal                 | Krt2      | K22E_MOUSE  | 71 kDa   | 0  | 0  | 0 | 1   | 0   | 0 |
| Corticosteroid 11-beta-dehydrogenase                      | Hsd11b1   | DHI1_MOUSE  | 32 kDa   | 0  | 1  | 0 | 0   | 0   | 0 |
| Cytochrome b5 type B                                      | Cyb5b     | CYB5B_MOUSE | 16 kDa   | 0  | 0  | 0 | 1   | 0   | 0 |
| Lamin-B1                                                  | Lmnb1     | LMNB1_MOUSE | 67 kDa   | 0  | 0  | 0 | 0   | 1   | 0 |
| Dolichyl-diphosphooligosaccharide 4-epimerase             | Dad1      | DAD1_MOUSE  | 12 kDa   | 0  | 1  | 0 | 0   | 0   | 0 |
| NADH dehydrogenase [ubiquinone]                           | Ndufa13   | NDUAD_MOUSE | 17 kDa   | 0  | 0  | 0 | 1   | 0   | 0 |
| Solute carrier family 22 member 27                        | Slc22a27  | S22AR_MOUSE | 62 kDa   | 0  | 0  | 0 | 0   | 1   | 0 |
| Annexin A7                                                | Anxa7     | ANXA7_MOUSE | 50 kDa   | 0  | 0  | 0 | 0   | 1   | 0 |
| Nidogen-2                                                 | Nid2      | NID2_MOUSE  | 154 kDa  | 0  | 0  | 0 | 0   | 1   | 0 |
| Keratin, type I cytoskeletal 19                           | Krt19     | K1C19_MOUSE | 45 kDa   | 0  | 1  | 0 | 0   | 0   | 0 |
| Fibrinogen beta chain                                     | Fgb       | FIBB_MOUSE  | 55 kDa   | 1  | 0  | 0 | 1   | 0   | 0 |
| Platelet glycoprotein 4                                   | Cd36      | CD36_MOUSE  | 53 kDa   | 1  | 1  | 0 | 0   | 0   | 0 |
| Desmin                                                    | Des       | DESM_MOUSE  | 53 kDa   | 0  | 0  | 0 | 2   | 0   | 0 |

|                                                    |          |             |         |   |   |   |   |    |   |
|----------------------------------------------------|----------|-------------|---------|---|---|---|---|----|---|
| Dihydropolyllysine-residue acetyltransferase       | Dlat     | ODP2_MOUSE  | 68 kDa  | 0 | 0 | 0 | 1 | 1  | 0 |
| Alpha-actinin-1                                    | Actn1    | ACTN1_MOUSE | 103 kDa | 0 | 0 | 0 | 1 | 1  | 0 |
| Acyl-CoA dehydrogenase family member               | Acad9    | ACAD9_MOUSE | 69 kDa  | 0 | 2 | 0 | 0 | 0  | 0 |
| Heterogeneous nuclear ribonucleoprotein            | Hnrnpk   | HNRPK_MOUSE | 51 kDa  | 0 | 0 | 0 | 1 | 1  | 0 |
| 40S ribosomal protein S3                           | Rps3     | RS3_MOUSE   | 27 kDa  | 0 | 0 | 0 | 0 | 2  | 0 |
| Unconventional myosin-1c                           | Myo1c    | MYO1C_MOUSE | 122 kDa | 0 | 0 | 0 | 0 | 2  | 0 |
| Dolichyl-diphosphooligosaccharide transferase      | Ddot     | OST48_MOUSE | 49 kDa  | 0 | 0 | 0 | 0 | 3  | 0 |
| NADH dehydrogenase [ubiquinone]                    | Ndufa9   | NDUA9_MOUSE | 43 kDa  | 0 | 0 | 0 | 1 | 2  | 0 |
| Heat shock protein HSP 90-beta                     | Hsp90ab1 | HS90B_MOUSE | 83 kDa  | 0 | 2 | 0 | 0 | 1  | 0 |
| Membrane-associated progesterone receptor          | Pgrmc1   | PGRC1_MOUSE | 22 kDa  | 0 | 0 | 0 | 0 | 3  | 0 |
| Caveolin-1                                         | Cav1     | CAV1_MOUSE  | 21 kDa  | 0 | 0 | 0 | 1 | 2  | 0 |
| Microsomal glutathione S-transferase               | Mgst1    | MGST1_MOUSE | 18 kDa  | 2 | 2 | 0 | 0 | 0  | 0 |
| Surfeit locus protein 4                            | Surf4    | SURF4_MOUSE | 30 kDa  | 2 | 2 | 0 | 0 | 0  | 0 |
| Collagen alpha-6(VI) chain                         | Col6a6   | CO6A6_MOUSE | 246 kDa | 1 | 0 | 0 | 1 | 2  | 0 |
| Fibrinogen alpha chain                             | Fga      | FIBA_MOUSE  | 87 kDa  | 0 | 0 | 0 | 1 | 3  | 0 |
| Cytochrome b-c1 complex subunit 1                  | Uqcrc1   | QCR1_MOUSE  | 53 kDa  | 0 | 0 | 0 | 3 | 1  | 0 |
| Cytochrome c1, heme protein, mitochondrial         | Cyc1     | CY1_MOUSE   | 35 kDa  | 0 | 0 | 0 | 2 | 2  | 0 |
| Nidogen-1                                          | Nid1     | NID1_MOUSE  | 137 kDa | 0 | 0 | 0 | 1 | 3  | 0 |
| Voltage-dependent anion-selective chloride channel | Vdac3    | VDAC3_MOUSE | 31 kDa  | 0 | 0 | 0 | 2 | 2  | 0 |
| NADH-ubiquinone oxidoreductase                     | Ndufs1   | NDUS1_MOUSE | 80 kDa  | 0 | 0 | 0 | 1 | 3  | 0 |
| Laminin subunit alpha-4                            | Lama4    | LAMA4_MOUSE | 202 kDa | 0 | 0 | 0 | 2 | 2  | 0 |
| Protein-glutamine gamma-glutamyl transferase       | Tgm1     | TGM1_MOUSE  | 90 kDa  | 0 | 2 | 0 | 0 | 2  | 0 |
| Insulin-degrading enzyme                           | Ide      | IDE_MOUSE   | 118 kDa | 0 | 1 | 0 | 0 | 3  | 0 |
| Aminopeptidase N                                   | Anpep    | AMPN_MOUSE  | 110 kDa | 0 | 1 | 0 | 1 | 2  | 0 |
| Desmoglein-3                                       | Dsg3     | DSG3_MOUSE  | 108 kDa | 0 | 4 | 0 | 0 | 0  | 0 |
| Sodium/potassium-transporting ATPase               | Atp1a1   | AT1A1_MOUSE | 113 kDa | 2 | 3 | 0 | 0 | 0  | 0 |
| ATP synthase subunit a                             | Mtstp6   | ATP6_MOUSE  | 25 kDa  | 2 | 3 | 0 | 0 | 0  | 0 |
| Lymphocyte antigen 6D                              | Ly6d     | LY6D_MOUSE  | 13 kDa  | 1 | 4 | 0 | 0 | 0  | 0 |
| Tubulin beta-4B chain                              | Tubb4b   | TBB4B_MOUSE | 50 kDa  | 0 | 0 | 0 | 3 | 2  | 0 |
| Prelamin-A/C                                       | Lmna     | LMNA_MOUSE  | 74 kDa  | 0 | 2 | 0 | 1 | 2  | 0 |
| Plakophilin-1                                      | Pkp1     | PKP1_MOUSE  | 81 kDa  | 0 | 3 | 0 | 0 | 2  | 0 |
| Prolargin                                          | Prelp    | PRELP_MOUSE | 43 kDa  | 0 | 0 | 0 | 2 | 3  | 0 |
| Annexin A2                                         | Anxa2    | ANXA2_MOUSE | 39 kDa  | 0 | 2 | 0 | 1 | 2  | 0 |
| Laminin subunit beta-1                             | Lamb1    | LAMB1_MOUSE | 197 kDa | 2 | 1 | 0 | 0 | 3  | 0 |
| Leucine-rich repeat-containing protein             | Lrrc15   | LRC15_MOUSE | 64 kDa  | 2 | 3 | 0 | 0 | 1  | 0 |
| ATP synthase subunit alpha, mitochondrial          | Atp5a1   | ATPA_MOUSE  | 60 kDa  | 0 | 2 | 0 | 2 | 2  | 0 |
| ATP synthase subunit beta, mitochondrial           | Atp5b    | ATPB_MOUSE  | 56 kDa  | 0 | 0 | 0 | 3 | 3  | 0 |
| Collagen alpha-1(XVI) chain                        | Col16a1  | COGA1_MOUSE | 156 kDa | 0 | 0 | 0 | 3 | 3  | 0 |
| 40S ribosomal protein S2                           | Rps2     | RS2_MOUSE   | 31 kDa  | 0 | 0 | 0 | 2 | 4  | 0 |
| Calnexin                                           | Canx     | CALX_MOUSE  | 67 kDa  | 0 | 3 | 0 | 0 | 3  | 0 |
| Tubulin beta-3 chain                               | Tubb3    | TBB3_MOUSE  | 50 kDa  | 0 | 0 | 0 | 1 | 5  | 0 |
| Heat shock protein beta-1                          | Hspb1    | HSPB1_MOUSE | 23 kDa  | 0 | 1 | 0 | 2 | 3  | 0 |
| Peptidyl-prolyl cis-trans isomerase                | Ppia     | PPIA_MOUSE  | 18 kDa  | 0 | 3 | 0 | 0 | 3  | 0 |
| Myosin-14                                          | Myh14    | MYH14_MOUSE | 229 kDa | 2 | 3 | 0 | 1 | 1  | 0 |
| Transmembrane protein 43                           | Tmem43   | TMM43_MOUSE | 45 kDa  | 1 | 2 | 0 | 2 | 2  | 0 |
| Myomesin-1                                         | Myom1    | MYOM1_MOUSE | 185 kDa | 0 | 0 | 0 | 7 | 0  | 0 |
| Protein S100-A3                                    | S100a3   | S10A3_MOUSE | 12 kDa  | 0 | 0 | 0 | 2 | 5  | 0 |
| Sarcoplasmic/endoplasmic reticulum chaperone       | Atp2a2   | AT2A2_MOUSE | 115 kDa | 4 | 2 | 0 | 0 | 2  | 0 |
| Integrin beta-4                                    | Itgb4    | ITB4_MOUSE  | 202 kDa | 2 | 2 | 0 | 1 | 3  | 0 |
| Desmocollin-3                                      | Dsc3     | DSC3_MOUSE  | 100 kDa | 2 | 2 | 0 | 2 | 2  | 0 |
| Protein-glutamine gamma-glutamyl transferase       | Tgm2     | TGM2_MOUSE  | 77 kDa  | 0 | 0 | 0 | 4 | 4  | 0 |
| Laminin subunit beta-2                             | Lamb2    | LAMB2_MOUSE | 197 kDa | 0 | 0 | 0 | 3 | 5  | 0 |
| Histone H3.1                                       | Hist1h3a | H31_MOUSE   | 15 kDa  | 0 | 2 | 0 | 2 | 4  | 0 |
| Elongation factor 1-alpha 1                        | Eef1a1   | EF1A1_MOUSE | 50 kDa  | 0 | 0 | 0 | 4 | 4  | 0 |
| Laminin subunit alpha-2                            | Lama2    | LAMA2_MOUSE | 344 kDa | 0 | 0 | 0 | 3 | 6  | 0 |
| Mitochondrial 2-oxoglutarate/malate translocase    | Slc25a11 | M2OM_MOUSE  | 34 kDa  | 2 | 2 | 0 | 3 | 3  | 0 |
| Phosphate carrier protein, mitochondrial           | Slc25a3  | MPCP_MOUSE  | 40 kDa  | 3 | 4 | 0 | 2 | 2  | 0 |
| Dipeptidase 1                                      | Dpep1    | DPEP1_MOUSE | 46 kDa  | 3 | 1 | 0 | 3 | 4  | 0 |
| Fibrinogen gamma chain                             | Fgg      | FIBG_MOUSE  | 49 kDa  | 2 | 2 | 2 | 2 | 3  | 0 |
| Myosin-11                                          | Myh11    | MYH11_MOUSE | 227 kDa | 2 | 5 | 0 | 0 | 5  | 0 |
| Keratin, type II cytoskeletal 80                   | Krt80    | K2C80_MOUSE | 51 kDa  | 0 | 0 | 0 | 2 | 10 | 0 |
| Very-long-chain enoyl-CoA reductase                | Tecr     | TECR_MOUSE  | 36 kDa  | 4 | 4 | 0 | 2 | 3  | 0 |
| Thy-1 membrane glycoprotein                        | Thy1     | THY1_MOUSE  | 18 kDa  | 3 | 6 | 0 | 2 | 2  | 0 |
| Mimecan                                            | Ogn      | MIME_MOUSE  | 34 kDa  | 5 | 6 | 0 | 2 | 1  | 0 |
| Transforming growth factor-beta inhibitor          | Tgfb1    | BGH3_MOUSE  | 75 kDa  | 0 | 0 | 0 | 7 | 8  | 0 |
| Sushi-repeat-containing protein                    | SrpX     | SRPX_MOUSE  | 52 kDa  | 0 | 5 | 0 | 4 | 6  | 0 |
| Myosin light chain 1/3, skeletal muscle            | Myf1     | MYL1_MOUSE  | 21 kDa  | 2 | 0 | 8 | 5 | 1  | 0 |
| Serpin H1                                          | Serpinh1 | SERPH_MOUSE | 47 kDa  | 1 | 2 | 0 | 5 | 8  | 0 |

|                                   |        |             |         |    |    |   |    |    |   |
|-----------------------------------|--------|-------------|---------|----|----|---|----|----|---|
| Voltage-dependent anion-selective | Vdac1  | VDAC1_MOUSE | 32 kDa  | 3  | 3  | 0 | 8  | 3  | 0 |
| Dolichyl-diphosphooligosaccharide | Rpn1   | RPN1_MOUSE  | 69 kDa  | 3  | 8  | 0 | 3  | 6  | 0 |
| Collagen alpha-1(V) chain         | Col5a1 | CO5A1_MOUSE | 184 kDa | 2  | 6  | 2 | 5  | 5  | 0 |
| Dolichyl-diphosphooligosaccharide | Rpn2   | RPN2_MOUSE  | 69 kDa  | 7  | 8  | 2 | 2  | 2  | 0 |
| Keratin, type I cuticular Ha6     | Krt36  | KRT36_MOUSE | 53 kDa  | 3  | 6  | 0 | 4  | 8  | 0 |
| Biglycan                          | Bgn    | PGS1_MOUSE  | 42 kDa  | 5  | 8  | 3 | 2  | 4  | 0 |
| Periostin                         | Postn  | POSTN_MOUSE | 93 kDa  | 3  | 8  | 0 | 3  | 8  | 0 |
| Filamin-C                         | Flnc   | FLNC_MOUSE  | 291 kDa | 2  | 2  | 2 | 13 | 8  | 0 |
| Collagen alpha-2(IV) chain        | Col4a2 | CO4A2_MOUSE | 167 kDa | 2  | 3  | 0 | 13 | 10 | 0 |
| Serum albumin                     | Alb    | ALBU_MOUSE  | 69 kDa  | 7  | 26 | 0 | 0  | 0  | 0 |
| Plectin                           | Plec   | PLEC_MOUSE  | 534 kDa | 1  | 4  | 0 | 12 | 22 | 0 |
| Keratin, type II cytoskeletal 75  | Krt75  | K2C75_MOUSE | 60 kDa  | 9  | 13 | 0 | 6  | 12 | 0 |
| Collagen alpha-2(V) chain         | Col5a2 | CO5A2_MOUSE | 145 kDa | 6  | 6  | 4 | 12 | 12 | 0 |
| Myosin-9                          | Myh9   | MYH9_MOUSE  | 226 kDa | 7  | 19 | 0 | 5  | 18 | 0 |
| Collagen alpha-1(VII) chain       | Col7a1 | CO7A1_MOUSE | 295 kDa | 12 | 17 | 1 | 14 | 30 | 0 |

| Lung                                |          |                  |                  | CNBr   |        |        | NH <sub>2</sub> OH |        |        |
|-------------------------------------|----------|------------------|------------------|--------|--------|--------|--------------------|--------|--------|
| Identified Proteins                 | Gene     | Accession Number | Molecular Weight | Lung 1 | Lung 2 | Lung 3 | Lung 1             | Lung 2 | Lung 3 |
| Collagen alpha-1(I) chain           | Col1a1   | CO1A1_MOUSE      | 138 kDa          | 119    | 312    | 115    | 314                | 224    | 278    |
| Collagen alpha-1(III) chain         | Col3a1   | CO3A1_MOUSE      | 139 kDa          | 72     | 241    | 66     | 215                | 167    | 191    |
| Collagen alpha-2(I) chain           | Col1a2   | CO1A2_MOUSE      | 130 kDa          | 86     | 205    | 75     | 196                | 137    | 181    |
| Basement membrane-specific hep      | Hspg2    | PGBM_MOUSE       | 398 kDa          | 0      | 32     | 5      | 102                | 53     | 85     |
| Myosin-14                           | Myh14    | MYH14_MOUSE      | 229 kDa          | 0      | 8      | 5      | 121                | 46     | 82     |
| Collagen alpha-2(IV) chain          | Col4a2   | CO4A2_MOUSE      | 167 kDa          | 3      | 27     | 8      | 104                | 54     | 69     |
| Plectin                             | Plec     | PLEC_MOUSE       | 534 kDa          | 0      | 1      | 0      | 106                | 38     | 59     |
| Laminin subunit beta-2              | Lamb2    | LAMB2_MOUSE      | 197 kDa          | 0      | 20     | 2      | 67                 | 36     | 47     |
| Collagen alpha-1(VI) chain          | Col6a1   | CO6A1_MOUSE      | 108 kDa          | 1      | 14     | 1      | 40                 | 18     | 43     |
| Vimentin                            | Vim      | VIME_MOUSE       | 54 kDa           | 10     | 18     | 12     | 36                 | 27     | 41     |
| Laminin subunit alpha-3             | Lama3    | LAMA3_MOUSE      | 366 kDa          | 0      | 11     | 1      | 39                 | 18     | 37     |
| Laminin subunit alpha-5             | Lama5    | LAMA5_MOUSE      | 404 kDa          | 0      | 15     | 0      | 63                 | 31     | 37     |
| Fibrillin-1                         | Fbn1     | FBN1_MOUSE       | 312 kDa          | 0      | 13     | 0      | 42                 | 28     | 36     |
| Laminin subunit gamma-1             | Lamc1    | LAMC1_MOUSE      | 177 kDa          | 5      | 33     | 10     | 57                 | 29     | 34     |
| Talin-1                             | Tln1     | TLN1_MOUSE       | 270 kDa          | 0      | 7      | 0      | 50                 | 24     | 33     |
| Collagen alpha-1(IV) chain          | Col4a1   | CO4A1_MOUSE      | 161 kDa          | 5      | 12     | 2      | 41                 | 32     | 32     |
| Myosin-11                           | Myh11    | MYH11_MOUSE      | 227 kDa          | 0      | 0      | 0      | 14                 | 11     | 31     |
| Keratin, type II cuticular Hb2      | Krt82    | KRT82_MOUSE      | 57 kDa           | 0      | 0      | 0      | 0                  | 76     | 28     |
| Tubulin alpha-1C chain              | Tuba1c   | TBA1C_MOUSE      | 50 kDa           | 0      | 4      | 0      | 27                 | 22     | 27     |
| Vinculin                            | Vcl      | VINC_MOUSE       | 117 kDa          | 0      | 2      | 0      | 40                 | 22     | 25     |
| Nidogen-1                           | Nid1     | NID1_MOUSE       | 137 kDa          | 0      | 2      | 0      | 23                 | 19     | 22     |
| Laminin subunit beta-1              | Lamb1    | LAMB1_MOUSE      | 197 kDa          | 1      | 8      | 3      | 24                 | 12     | 22     |
| Collagen alpha-2(VI) chain          | Col6a2   | CO6A2_MOUSE      | 110 kDa          | 0      | 12     | 1      | 29                 | 15     | 20     |
| Actin, alpha skeletal muscle        | Acta1    | ACTS_MOUSE       | 42 kDa           | 2      | 1      | 2      | 19                 | 16     | 19     |
| EMILIN-1                            | Emilin1  | EMIL1_MOUSE      | 108 kDa          | 1      | 11     | 3      | 20                 | 10     | 19     |
| Fibronectin                         | Fn1      | FINC_MOUSE       | 273 kDa          | 0      | 2      | 0      | 34                 | 15     | 19     |
| ADP/ATP translocase 1               | Slc25a4  | ADT1_MOUSE       | 33 kDa           | 0      | 2      | 0      | 10                 | 11     | 18     |
| Myosin-9                            | Myh9     | MYH9_MOUSE       | 226 kDa          | 0      | 3      | 0      | 41                 | 14     | 17     |
| Fibrinogen gamma chain              | Fgg      | FIBG_MOUSE       | 49 kDa           | 0      | 4      | 1      | 21                 | 8      | 16     |
| Tubulin beta-5 chain                | Tubb5    | TBB5_MOUSE       | 50 kDa           | 0      | 0      | 0      | 29                 | 20     | 16     |
| Fibulin-5                           | Fbln5    | FBLN5_MOUSE      | 50 kDa           | 0      | 2      | 0      | 13                 | 14     | 15     |
| Band 3 anion transport protein      | Slc4a1   | B3AT_MOUSE       | 103 kDa          | 0      | 6      | 4      | 18                 | 5      | 15     |
| Protein-glutamine gamma-glutamyl    | Tgm2     | TGM2_MOUSE       | 77 kDa           | 0      | 4      | 0      | 20                 | 10     | 15     |
| Titin                               | Ttn      | TITIN_MOUSE      | 3906 kDa         | 0      | 0      | 0      | 12                 | 2      | 14     |
| Fibrinogen alpha chain              | Fga      | FIBA_MOUSE       | 87 kDa           | 0      | 5      | 2      | 16                 | 4      | 14     |
| Collagen alpha-4(IV) chain          | Col4a4   | CO4A4_MOUSE      | 164 kDa          | 0      | 6      | 2      | 15                 | 8      | 14     |
| Histone H4                          | Hist1h4a | H4_MOUSE         | 11 kDa           | 0      | 4      | 0      | 11                 | 22     | 14     |
| Laminin subunit beta-3              | Lamb3    | LAMB3_MOUSE      | 129 kDa          | 0      | 6      | 2      | 16                 | 7      | 13     |
| Desmin                              | Des      | DESM_MOUSE       | 53 kDa           | 4      | 7      | 1      | 4                  | 9      | 12     |
| Keratin, type I cuticular Ha3-l     | Krt33a   | KT33A_MOUSE      | 46 kDa           | 0      | 0      | 0      | 0                  | 168    | 12     |
| Nephronectin                        | Npnt     | NPNT_MOUSE       | 61 kDa           | 0      | 4      | 1      | 16                 | 10     | 11     |
| Voltage-dependent anion-selective   | Vdac1    | VDAC1_MOUSE      | 32 kDa           | 0      | 0      | 0      | 5                  | 3      | 10     |
| Microfibril-associated glycoprotein | Mfap4    | MFAP4_MOUSE      | 29 kDa           | 0      | 0      | 0      | 6                  | 6      | 10     |
| Sarcoplasmic/endoplasmic reticul    | Atp2a2   | AT2A2_MOUSE      | 115 kDa          | 0      | 6      | 0      | 6                  | 4      | 10     |
| Actin, cytoplasmic 1                | Actb     | ACTB_MOUSE       | 42 kDa           | 0      | 0      | 0      | 12                 | 7      | 10     |
| Collagen alpha-3(IV) chain          | Col4a3   | CO4A3_MOUSE      | 162 kDa          | 0      | 2      | 0      | 20                 | 6      | 10     |
| Keratin, type II cuticular Hb5      | Krt85    | KRT85_MOUSE      | 56 kDa           | 6      | 2      | 6      | 6                  | 32     | 10     |
| Keratin, type II cytoskeletal 5     | Krt5     | K2C5_MOUSE       | 62 kDa           | 10     | 7      | 11     | 25                 | 15     | 10     |
| Platelet glycoprotein 4             | Cd36     | CD36_MOUSE       | 53 kDa           | 0      | 0      | 0      | 7                  | 4      | 9      |

|                                       |          |             |         |    |    |    |    |    |   |
|---------------------------------------|----------|-------------|---------|----|----|----|----|----|---|
| Fibrinogen beta chain                 | Fgb      | FIBB_MOUSE  | 55 kDa  | 0  | 0  | 0  | 11 | 3  | 9 |
| Laminin subunit alpha-4               | Lama4    | LAMA4_MOUSE | 202 kDa | 0  | 0  | 0  | 14 | 2  | 9 |
| Periostin                             | Postn    | POSTN_MOUSE | 93 kDa  | 0  | 3  | 0  | 10 | 7  | 9 |
| Collagen alpha-1(V) chain             | Col5a1   | CO5A1_MOUSE | 184 kDa | 2  | 4  | 2  | 12 | 6  | 9 |
| Myosin-4                              | Myh4     | MYH4_MOUSE  | 223 kDa | 0  | 13 | 0  | 14 | 4  | 9 |
| Elastin                               | Eln      | ELN_MOUSE   | 72 kDa  | 0  | 6  | 2  | 12 | 11 | 9 |
| Filamin-A                             | Flna     | FLNA_MOUSE  | 281 kDa | 0  | 4  | 0  | 13 | 8  | 8 |
| Collagen alpha-2(V) chain             | Col5a2   | CO5A2_MOUSE | 145 kDa | 3  | 15 | 0  | 13 | 8  | 8 |
| Keratin, type I cytoskeletal 10       | Krt10    | K1C10_MOUSE | 58 kDa  | 17 | 10 | 19 | 10 | 10 | 8 |
| Catenin alpha-1                       | Ctnna1   | CTNA1_MOUSE | 100 kDa | 0  | 0  | 0  | 11 | 1  | 7 |
| Keratin, type II cuticular Hb1        | Krt81    | KRT81_MOUSE | 53 kDa  | 0  | 0  | 0  | 0  | 62 | 7 |
| Dipeptidase 1                         | Dpep1    | DPEP1_MOUSE | 46 kDa  | 0  | 0  | 0  | 6  | 3  | 6 |
| Caveolin-1                            | Cav1     | CAV1_MOUSE  | 21 kDa  | 0  | 0  | 0  | 6  | 3  | 6 |
| Cytochrome c oxidase subunit 2        | Mtco2    | COX2_MOUSE  | 26 kDa  | 0  | 0  | 0  | 8  | 4  | 6 |
| Keratin, type II cuticular 87         | Krt87    | KRT87_MOUSE | 55 kDa  | 0  | 0  | 0  | 0  | 84 | 6 |
| Plasmalemma vesicle-associated p      | Plvap    | PLVAP_MOUSE | 50 kDa  | 0  | 0  | 0  | 7  | 4  | 5 |
| Sarcoplasmic/endoplasmic reticul      | Atp2a1   | AT2A1_MOUSE | 109 kDa | 0  | 7  | 0  | 3  | 3  | 5 |
| MICOS complex subunit Mic60           | Immt     | MIC60_MOUSE | 84 kDa  | 0  | 0  | 0  | 2  | 0  | 4 |
| Phosphate carrier protein, mitoch     | Slc25a3  | MPCP_MOUSE  | 40 kDa  | 0  | 0  | 0  | 3  | 1  | 4 |
| Voltage-dependent anion-selective     | Vdac2    | VDAC2_MOUSE | 32 kDa  | 0  | 1  | 0  | 2  | 1  | 4 |
| Alpha-actinin-2                       | Actn2    | ACTN2_MOUSE | 104 kDa | 0  | 0  | 0  | 5  | 0  | 4 |
| Laminin subunit alpha-2               | Lama2    | LAMA2_MOUSE | 344 kDa | 0  | 0  | 0  | 5  | 0  | 4 |
| Hemoglobin subunit alpha              | Hba      | HBA_MOUSE   | 15 kDa  | 0  | 0  | 0  | 4  | 2  | 4 |
| Tubulin beta-4B chain                 | Tubb4b   | TBB4B_MOUSE | 50 kDa  | 0  | 0  | 0  | 4  | 2  | 4 |
| Keratin, type I cytoskeletal 19       | Krt19    | K1C19_MOUSE | 45 kDa  | 0  | 0  | 0  | 3  | 3  | 4 |
| Histone H3.1                          | Hist1h3a | H31_MOUSE   | 15 kDa  | 0  | 0  | 0  | 4  | 4  | 4 |
| Cadherin-5                            | Cdh5     | CADH5_MOUSE | 88 kDa  | 0  | 0  | 0  | 6  | 2  | 4 |
| Pulmonary surfactant-associated p     | Sftpb    | PSPB_MOUSE  | 42 kDa  | 0  | 0  | 0  | 4  | 4  | 4 |
| Serpin H1                             | Serpinh1 | SERPH_MOUSE | 47 kDa  | 0  | 0  | 0  | 7  | 4  | 4 |
| Myosin-1                              | Myh1     | MYH1_MOUSE  | 223 kDa | 0  | 4  | 0  | 10 | 0  | 4 |
| Hemoglobin subunit beta-1             | Hbb-b1   | HBB1_MOUSE  | 16 kDa  | 0  | 1  | 0  | 10 | 9  | 4 |
| Spectrin beta chain, non-erythrocy    | Sptbn1   | SPTB2_MOUSE | 274 kDa | 0  | 0  | 0  | 19 | 2  | 4 |
| Keratin, type I cuticular Ha1         | Krt31    | K1H1_MOUSE  | 47 kDa  | 0  | 0  | 0  | 0  | 68 | 4 |
| Unconventional myosin-Ic              | Myo1c    | MYO1C_MOUSE | 122 kDa | 0  | 0  | 0  | 2  | 0  | 3 |
| Spectrin alpha chain, erythrocytic    | Spta1    | SPTA1_MOUSE | 280 kDa | 0  | 0  | 0  | 6  | 0  | 3 |
| Laminin subunit gamma-2               | Lamc2    | LAMC2_MOUSE | 130 kDa | 0  | 4  | 0  | 2  | 0  | 3 |
| Clathrin heavy chain 1                | Cltc     | CLH1_MOUSE  | 192 kDa | 0  | 0  | 0  | 7  | 0  | 3 |
| Nidogen-2                             | Nid2     | NID2_MOUSE  | 154 kDa | 0  | 0  | 0  | 5  | 2  | 3 |
| Lamin-B1                              | Lmnb1    | LMNB1_MOUSE | 67 kDa  | 0  | 0  | 0  | 8  | 3  | 3 |
| Keratin, type II cytoskeletal 2 epide | Krt2     | K22E_MOUSE  | 71 kDa  | 2  | 2  | 5  | 2  | 4  | 3 |
| Keratin, type II cytoskeletal 79      | Krt79    | K2C79_MOUSE | 58 kDa  | 2  | 2  | 4  | 3  | 5  | 3 |
| Spectrin beta chain, erythrocytic     | Sptb     | SPTB1_MOUSE | 245 kDa | 0  | 0  | 0  | 20 | 5  | 3 |
| Keratin, type II cytoskeletal 8       | Krt8     | K2C8_MOUSE  | 55 kDa  | 3  | 1  | 4  | 5  | 13 | 3 |
| Transmembrane protein 43              | Tmem43   | TMM43_MOUSE | 45 kDa  | 0  | 0  | 0  | 1  | 0  | 2 |
| Calnexin                              | Canx     | CALX_MOUSE  | 67 kDa  | 0  | 0  | 0  | 2  | 0  | 2 |
| Catenin delta-1                       | Ctnnd1   | CTND1_MOUSE | 105 kDa | 0  | 0  | 0  | 2  | 0  | 2 |
| Periaxin                              | Prx      | PRAX_MOUSE  | 148 kDa | 0  | 1  | 0  | 1  | 0  | 2 |
| 60S ribosomal protein L15             | Rpl15    | RL15_MOUSE  | 24 kDa  | 0  | 0  | 0  | 2  | 2  | 2 |
| 40S ribosomal protein S2              | Rps2     | RS2_MOUSE   | 31 kDa  | 0  | 0  | 0  | 3  | 2  | 2 |
| Myosin-10                             | Myh10    | MYH10_MOUSE | 229 kDa | 0  | 0  | 0  | 5  | 1  | 2 |
| Lamina-associated polypeptide 2,      | Tmpo     | LAP2B_MOUSE | 50 kDa  | 0  | 0  | 0  | 6  | 1  | 2 |
| Heterogeneous nuclear ribonucleo      | Hnrrpk   | HNRPK_MOUSE | 51 kDa  | 0  | 2  | 0  | 3  | 3  | 2 |
| Biglycan                              | Bgn      | PGS1_MOUSE  | 42 kDa  | 3  | 4  | 1  | 2  | 0  | 2 |
| Keratin, type II cytoskeletal 1       | Krt1     | K2C1_MOUSE  | 66 kDa  | 2  | 2  | 2  | 2  | 2  | 2 |
| Ubiquitin-60S ribosomal protein L4    | Uba52    | RL40_MOUSE  | 15 kDa  | 0  | 2  | 0  | 4  | 4  | 2 |
| Ankyrin-1                             | Ank1     | ANK1_MOUSE  | 204 kDa | 0  | 0  | 0  | 11 | 4  | 2 |
| Prelamin-A/C                          | Lmna     | LMNA_MOUSE  | 74 kDa  | 1  | 4  | 3  | 8  | 0  | 2 |
| Cytochrome b5 type B                  | Cyb5b    | CYB5B_MOUSE | 16 kDa  | 0  | 0  | 0  | 1  | 0  | 1 |
| Collagen alpha-1(VII) chain           | Col7a1   | CO7A1_MOUSE | 295 kDa | 0  | 2  | 0  | 1  | 0  | 1 |
| Voltage-dependent anion-selective     | Vdac3    | VDAC3_MOUSE | 31 kDa  | 0  | 0  | 0  | 2  | 2  | 1 |
| Keratin, type I cytoskeletal 18       | Krt18    | K1C18_MOUSE | 48 kDa  | 0  | 2  | 0  | 4  | 1  | 1 |
| Integrin beta-1                       | Itgb1    | ITB1_MOUSE  | 88 kDa  | 0  | 1  | 0  | 5  | 2  | 1 |
| Keratin, type I cuticular Ha2         | Krt32    | K1H2_MOUSE  | 46 kDa  | 0  | 0  | 0  | 0  | 10 | 1 |
| Keratin, type I cytoskeletal 14       | Krt14    | K1C14_MOUSE | 53 kDa  | 5  | 5  | 4  | 6  | 10 | 1 |
| Keratin, type I cytoskeletal 13       | Krt13    | K1C13_MOUSE | 48 kDa  | 10 | 18 | 0  | 28 | 18 | 1 |
| Filamin-C                             | Flnc     | FLNC_MOUSE  | 291 kDa | 0  | 1  | 0  | 0  | 0  | 0 |
| ADP/ATP translocase 2                 | Slc25a5  | ADT2_MOUSE  | 33 kDa  | 0  | 0  | 0  | 0  | 1  | 0 |
| Catenin beta-1                        | Ctnnb1   | CTNB1_MOUSE | 85 kDa  | 0  | 0  | 0  | 1  | 0  | 0 |

|                                      |           |             |         |    |    |   |    |    |   |
|--------------------------------------|-----------|-------------|---------|----|----|---|----|----|---|
| Elongation factor 2                  | Eef2      | EF2_MOUSE   | 95 kDa  | 0  | 0  | 0 | 0  | 1  | 0 |
| Afadin                               | Afdn      | AFAD_MOUSE  | 207 kDa | 0  | 0  | 0 | 1  | 0  | 0 |
| Heat shock protein beta-1            | Hspb1     | HSPB1_MOUSE | 23 kDa  | 0  | 0  | 0 | 0  | 1  | 0 |
| Epiplakin                            | Eppk1     | EPIPL_MOUSE | 725 kDa | 0  | 0  | 0 | 2  | 0  | 0 |
| ATP synthase subunit beta, mitoch    | Atp5b     | ATPB_MOUSE  | 56 kDa  | 0  | 0  | 0 | 0  | 2  | 0 |
| Elongation factor 1-alpha 1          | Eef1a1    | EF1A1_MOUSE | 50 kDa  | 0  | 0  | 0 | 0  | 2  | 0 |
| Splicing factor, proline- and glutam | Sfpq      | SFPQ_MOUSE  | 75 kDa  | 0  | 0  | 0 | 0  | 2  | 0 |
| 60S ribosomal protein L27a           | Rpl27a    | RL27A_MOUSE | 17 kDa  | 0  | 0  | 0 | 1  | 1  | 0 |
| Amine oxidase [flavin-containing]    | Maoa      | AOFA_MOUSE  | 60 kDa  | 0  | 0  | 0 | 2  | 0  | 0 |
| Probable ATP-dependent RNA hel       | Ddx17     | DDX17_MOUSE | 72 kDa  | 0  | 0  | 0 | 2  | 0  | 0 |
| Leucine-rich repeat-containing pro   | Lrrc15    | LRC15_MOUSE | 64 kDa  | 0  | 0  | 0 | 0  | 2  | 0 |
| Heterogeneous nuclear ribonucleo     | Hnrrnp1   | HNRH1_MOUSE | 49 kDa  | 0  | 0  | 0 | 2  | 0  | 0 |
| Clusterin                            | Clu       | CLUS_MOUSE  | 52 kDa  | 0  | 0  | 0 | 2  | 0  | 0 |
| Peptidyl-prolyl cis-trans isomerase  | Ppia      | PPIA_MOUSE  | 18 kDa  | 0  | 0  | 0 | 0  | 2  | 0 |
| Dolichyl-diphosphooligosaccharide    | Rpn2      | RPN2_MOUSE  | 69 kDa  | 0  | 2  | 0 | 1  | 0  | 0 |
| Keratin, type II cytoskeletal 75     | Krt75     | K2C75_MOUSE | 60 kDa  | 0  | 0  | 0 | 0  | 3  | 0 |
| Plakophilin-1                        | Pkp1      | PKP1_MOUSE  | 81 kDa  | 0  | 0  | 0 | 0  | 3  | 0 |
| Myoferlin                            | Myof      | MYOF_MOUSE  | 233 kDa | 0  | 0  | 0 | 3  | 0  | 0 |
| Apolipoprotein A-I                   | Apoa1     | APOA1_MOUSE | 31 kDa  | 0  | 0  | 0 | 3  | 0  | 0 |
| Collagen alpha-1(II) chain           | Col2a1    | CO2A1_MOUSE | 142 kDa | 2  | 2  | 0 | 0  | 0  | 0 |
| Keratin-associated protein 3-2       | Krtap3-2  | KRA32_MOUSE | 11 kDa  | 0  | 0  | 0 | 0  | 4  | 0 |
| Keratin, type I cuticular Ha6        | Krt36     | KRT36_MOUSE | 53 kDa  | 0  | 0  | 0 | 0  | 4  | 0 |
| Keratin, type II cytoskeletal 7      | Krt7      | K2C7_MOUSE  | 51 kDa  | 0  | 0  | 0 | 0  | 4  | 0 |
| Histone H2A type 1-F                 | Hist1h2af | H2A1F_MOUSE | 14 kDa  | 0  | 0  | 0 | 0  | 6  | 0 |
| Tubulin beta-3 chain                 | Tubb3     | TBB3_MOUSE  | 50 kDa  | 0  | 0  | 0 | 4  | 2  | 0 |
| Tight junction protein ZO-1          | Tjp1      | ZO1_MOUSE   | 195 kDa | 0  | 2  | 0 | 3  | 1  | 0 |
| Alpha-actinin-3                      | Actn3     | ACTN3_MOUSE | 103 kDa | 0  | 2  | 0 | 4  | 1  | 0 |
| Spectrin alpha chain, non-erythro    | Sptan1    | SPTN1_MOUSE | 285 kDa | 0  | 0  | 0 | 6  | 1  | 0 |
| Keratin, type II cytoskeletal 1b     | Krt77     | K2C1B_MOUSE | 61 kDa  | 4  | 0  | 2 | 2  | 0  | 0 |
| Keratin, type I cytoskeletal 16      | Krt16     | K1C16_MOUSE | 52 kDa  | 0  | 0  | 0 | 0  | 8  | 0 |
| Serum albumin                        | Alb       | ALBU_MOUSE  | 69 kDa  | 0  | 0  | 0 | 7  | 2  | 0 |
| Keratin, type I cuticular Ha3-II     | Krt33b    | KT33B_MOUSE | 46 kDa  | 0  | 0  | 0 | 0  | 9  | 0 |
| Keratin, type I cuticular Ha4        | Krt34     | KRT34_MOUSE | 45 kDa  | 0  | 0  | 0 | 0  | 9  | 0 |
| Pulmonary surfactant-associated p    | Sftpa1    | SFTPA_MOUSE | 26 kDa  | 0  | 2  | 2 | 4  | 1  | 0 |
| Annexin A2                           | Anxa2     | ANXA2_MOUSE | 39 kDa  | 0  | 0  | 0 | 0  | 9  | 0 |
| Keratin, type I cytoskeletal 17      | Krt17     | K1C17_MOUSE | 48 kDa  | 0  | 0  | 0 | 0  | 11 | 0 |
| 14-3-3 protein sigma                 | Sfn       | 1433S_MOUSE | 28 kDa  | 0  | 0  | 0 | 0  | 11 | 0 |
| Keratin, type I cuticular Ha5        | Krt35     | KRT35_MOUSE | 51 kDa  | 0  | 0  | 0 | 0  | 12 | 0 |
| Keratin, type II cytoskeletal 6A     | Krt6a     | K2C6A_MOUSE | 59 kDa  | 0  | 4  | 0 | 0  | 9  | 0 |
| Desmoplakin                          | Dsp       | DESP_MOUSE  | 333 kDa | 0  | 0  | 0 | 1  | 17 | 0 |
| Histone H2B type 1-B                 | Hist1h2bb | H2B1B_MOUSE | 14 kDa  | 0  | 0  | 0 | 2  | 16 | 0 |
| Junction plakoglobin                 | Jup       | PLAK_MOUSE  | 82 kDa  | 0  | 0  | 0 | 10 | 21 | 0 |
| Keratin, type II cytoskeletal 4      | Krt4      | K2C4_MOUSE  | 56 kDa  | 18 | 17 | 4 | 52 | 0  | 0 |

| Muscle | Identified Proteins                 | Gene    | Accession Number | Molecular Weight | CNBr     |          |          | NH <sub>2</sub> OH |          |          |
|--------|-------------------------------------|---------|------------------|------------------|----------|----------|----------|--------------------|----------|----------|
|        |                                     |         |                  |                  | Muscle 1 | Muscle 2 | Muscle 3 | Muscle 1           | Muscle 2 | Muscle 3 |
|        | Titin                               | Ttn     | TITIN_MOUSE      | 3906 kDa         | 2778     | 1132     | 1987     | 2405               | 2522     | 2218     |
|        | Myosin-4                            | Myh4    | MYH4_MOUSE       | 223 kDa          | 464      | 533      | 681      | 471                | 554      | 763      |
|        | Collagen alpha-1(I) chain           | Col1a1  | CO1A1_MOUSE      | 128 kDa          | 172      | 224      | 180      | 249                | 248      | 212      |
|        | Sarcoplasmic/endoplasmic reticul    | Atp2a1  | AT2A1_MOUSE      | 109 kDa          | 141      | 190      | 179      | 321                | 268      | 142      |
|        | Collagen alpha-1(III) chain         | Col3a1  | CO3A1_MOUSE      | 139 kDa          | 95       | 136      | 113      | 143                | 133      | 132      |
|        | Collagen alpha-2(I) chain           | Col1a2  | CO1A2_MOUSE      | 130 kDa          | 120      | 155      | 134      | 172                | 185      | 131      |
|        | Alpha-actinin-3                     | Actn3   | ACTN3_MOUSE      | 103 kDa          | 163      | 110      | 168      | 148                | 126      | 124      |
|        | Actin, alpha skeletal muscle        | Acta1   | ACTS_MOUSE       | 42 kDa           | 57       | 13       | 49       | 94                 | 104      | 64       |
|        | AMP deaminase 1                     | Ampd1   | AMPD1_MOUSE      | 86 kDa           | 28       | 12       | 23       | 33                 | 24       | 30       |
|        | ADP/ATP translocase 1               | Slc25a4 | ADT1_MOUSE       | 33 kDa           | 55       | 42       | 52       | 55                 | 53       | 22       |
|        | Filamin-C                           | Flnc    | FLNC_MOUSE       | 291 kDa          | 70       | 20       | 62       | 39                 | 59       | 18       |
|        | Alpha-actinin-2                     | Actn2   | ACTN2_MOUSE      | 104 kDa          | 25       | 8        | 26       | 44                 | 53       | 10       |
|        | Keratin, type I cytoskeletal 10     | Krt10   | K1C10_MOUSE      | 58 kDa           | 6        | 9        | 6        | 4                  | 3        | 9        |
|        | Myosin light chain 1/3, skeletal mu | Myl1    | MYL1_MOUSE       | 21 kDa           | 6        | 19       | 9        | 12                 | 9        | 9        |
|        | Voltage-dependent anion-selective   | Vdac1   | VDAC1_MOUSE      | 32 kDa           | 18       | 4        | 11       | 7                  | 6        | 7        |
|        | Myosin-1                            | Myh1    | MYH1_MOUSE       | 223 kDa          | 48       | 17       | 61       | 76                 | 85       | 7        |
|        | Keratin, type II cuticular 87       | Krt87   | KRT87_MOUSE      | 55 kDa           | 4        | 0        | 0        | 0                  | 0        | 6        |
|        | Keratin, type II cuticular Hb5      | Krt85   | KRT85_MOUSE      | 56 kDa           | 2        | 1        | 0        | 2                  | 4        | 6        |
|        | Myomesin-1                          | Myom1   | MYOM1_MOUSE      | 185 kDa          | 61       | 6        | 17       | 6                  | 10       | 6        |
|        | Keratin, type I cuticular Ha3-I     | Krt33a  | KT33A_MOUSE      | 46 kDa           | 2        | 0        | 0        | 0                  | 0        | 5        |
|        | Keratin, type II cytoskeletal 5     | Krt5    | K2C5_MOUSE       | 62 kDa           | 2        | 4        | 2        | 4                  | 4        | 5        |

|                                       |        |                 |         |    |    |    |    |    |   |
|---------------------------------------|--------|-----------------|---------|----|----|----|----|----|---|
| Collagen alpha-1(IV) chain            | Col4a1 | CO4A1_MOUSE     | 161 kDa | 1  | 2  | 3  | 10 | 5  | 4 |
| Collagen alpha-2(IV) chain            | Col4a2 | CO4A2_MOUSE     | 167 kDa | 1  | 1  | 0  | 15 | 8  | 4 |
| Collagen alpha-2(V) chain             | Col5a2 | CO5A2_MOUSE     | 145 kDa | 3  | 8  | 2  | 8  | 6  | 4 |
| Cytochrome c oxidase subunit 2        | Mtco2  | COX2_MOUSE      | 26 kDa  | 0  | 0  | 0  | 21 | 20 | 4 |
| Myosin regulatory light chain 2, sk   | Mylpf  | MLRS_MOUSE      | 19 kDa  | 0  | 2  | 0  | 2  | 5  | 3 |
| Keratin, type II cytoskeletal 2 epide | Krt2   | K22E_MOUSE      | 71 kDa  | 0  | 2  | 1  | 1  | 2  | 2 |
| Tropomyosin alpha-1 chain             | Tpm1   | TPM1_MOUSE      | 33 kDa  | 0  | 2  | 0  | 1  | 3  | 2 |
| Tubulin beta-5 chain                  | Tubb5  | TBB5_MOUSE      | 50 kDa  | 2  | 0  | 0  | 2  | 3  | 2 |
| Keratin, type II cytoskeletal 1b      | Krt77  | K2C1B_MOUSE     | 61 kDa  | 2  | 0  | 1  | 2  | 2  | 2 |
| Myosin-7                              | Myh7   | MYH7_MOUSE      | 223 kDa | 0  | 0  | 0  | 0  | 7  | 2 |
| Keratin, type II cytoskeletal 1       | Krt1   | K2C1_MOUSE      | 66 kDa  | 2  | 2  | 2  | 2  | 2  | 2 |
| Keratin, type II cytoskeletal 79      | Krt79  | K2C79_MOUSE     | 58 kDa  | 2  | 4  | 2  | 2  | 2  | 2 |
| Triadin                               | Trdn   | TRDN_MOUSE      | 78 kDa  | 2  | 4  | 4  | 2  | 0  | 2 |
| Ubiquitin-60S ribosomal protein L4    | Uba52  | RL40_MOUSE (+3) | 15 kDa  | 1  | 4  | 2  | 3  | 3  | 2 |
| Basement membrane-specific hep        | Hspg2  | PGBM_MOUSE      | 398 kDa | 10 | 1  | 0  | 1  | 2  | 2 |
| Keratin, type I cytoskeletal 14       | Krt14  | K1C14_MOUSE     | 53 kDa  | 2  | 4  | 2  | 2  | 4  | 2 |
| Collagen alpha-2(VI) chain            | Col6a2 | CO6A2_MOUSE     | 110 kDa | 6  | 2  | 3  | 2  | 4  | 2 |
| Alpha-actinin-1                       | Actn1  | ACTN1_MOUSE     | 103 kDa | 7  | 2  | 5  | 2  | 2  | 2 |
| Collagen alpha-1(V) chain             | Col5a1 | CO5A1_MOUSE     | 184 kDa | 1  | 4  | 2  | 8  | 4  | 2 |
| Collagen alpha-1(VI) chain            | Col6a1 | CO6A1_MOUSE     | 108 kDa | 23 | 5  | 10 | 13 | 12 | 2 |
| Obscurin                              | Obscn  | OBSCN_MOUSE     | 966 kDa | 30 | 2  | 12 | 9  | 16 | 2 |
| Plectin                               | Plec   | PLEC_MOUSE      | 534 kDa | 48 | 13 | 47 | 64 | 50 | 2 |
| Keratin, type II cuticular Hb1        | Krt81  | KRT81_MOUSE     | 53 kDa  | 0  | 0  | 0  | 0  | 0  | 1 |
| Keratin, type I cuticular Ha4         | Krt34  | KRT34_MOUSE     | 45 kDa  | 0  | 0  | 0  | 0  | 0  | 1 |
| Collagen alpha-1(II) chain            | Col2a1 | CO2A1_MOUSE     | 142 kDa | 2  | 3  | 2  | 0  | 0  | 1 |
| ATP synthase F(0) complex subun       | Atp5f1 | AT5F1_MOUSE     | 29 kDa  | 1  | 0  | 2  | 4  | 1  | 1 |
| NADH dehydrogenase [ubiquinone        | Ndufa9 | NDUA9_MOUSE     | 43 kDa  | 2  | 1  | 1  | 6  | 7  | 1 |
| Kelch-like protein 41                 | Klhl41 | KLH41_MOUSE     | 68 kDa  | 10 | 2  | 5  | 4  | 4  | 1 |
| Desmin                                | Des    | DESM_MOUSE      | 53 kDa  | 7  | 11 | 7  | 9  | 7  | 1 |
| Ryanodine receptor 1                  | Ryr1   | RYR1_MOUSE      | 565 kDa | 12 | 13 | 13 | 36 | 13 | 1 |
| Fibrillin-1                           | Fbn1   | FBN1_MOUSE      | 312 kDa | 79 | 0  | 0  | 9  | 4  | 1 |
| Hemoglobin subunit beta-1             | Hbb-b1 | HBB1_MOUSE      | 16 kDa  | 0  | 0  | 0  | 0  | 1  | 0 |
| Voltage-dependent anion-selective     | Vdac2  | VDAC2_MOUSE     | 32 kDa  | 0  | 0  | 1  | 0  | 0  | 0 |
| Filamin-A                             | Flna   | FLNA_MOUSE      | 281 kDa | 1  | 0  | 0  | 0  | 0  | 0 |
| Caveolin-1                            | Cav1   | CAV1_MOUSE      | 21 kDa  | 0  | 0  | 0  | 1  | 0  | 0 |
| Plakophilin-1                         | Pkp1   | PKP1_MOUSE      | 81 kDa  | 0  | 0  | 0  | 1  | 0  | 0 |
| Cytochrome c oxidase subunit 5A,      | Cox5a  | COX5A_MOUSE     | 16 kDa  | 0  | 1  | 0  | 0  | 0  | 0 |
| Glyceraldehyde-3-phosphate dehy       | Gapdh  | G3P_MOUSE       | 36 kDa  | 0  | 1  | 0  | 0  | 0  | 0 |
| Glycogen [starch] synthase, liver     | Gys2   | GYS2_MOUSE      | 81 kDa  | 0  | 0  | 1  | 0  | 0  | 0 |
| NADH-ubiquinone oxidoreductase        | Mtnd5  | NU5M_MOUSE      | 68 kDa  | 0  | 0  | 0  | 1  | 0  | 0 |
| Succinate dehydrogenase cytochr       | Sdhc   | C560_MOUSE      | 18 kDa  | 0  | 0  | 0  | 1  | 0  | 0 |
| ATP synthase subunit alpha, mito      | Atp5a1 | ATPA_MOUSE      | 60 kDa  | 0  | 0  | 0  | 1  | 1  | 0 |
| Laminin subunit beta-2                | Lamb2  | LAMB2_MOUSE     | 197 kDa | 2  | 0  | 0  | 0  | 0  | 0 |
| Biglycan                              | Bgn    | PGS1_MOUSE      | 42 kDa  | 2  | 0  | 0  | 0  | 0  | 0 |
| MICOS complex subunit Mic60           | Immt   | MIC60_MOUSE     | 84 kDa  | 0  | 0  | 0  | 2  | 0  | 0 |
| Keratin, type II cytoskeletal 6A      | Krt6a  | K2C6A_MOUSE     | 59 kDa  | 0  | 2  | 0  | 0  | 0  | 0 |
| Nidogen-1                             | Nid1   | NID1_MOUSE      | 137 kDa | 2  | 0  | 0  | 0  | 0  | 0 |
| Tubulin beta-4B chain                 | Tubb4b | TBB4B_MOUSE     | 50 kDa  | 1  | 0  | 0  | 1  | 0  | 0 |
| Tubulin beta-3 chain                  | Tubb3  | TBB3_MOUSE      | 50 kDa  | 1  | 0  | 0  | 1  | 0  | 0 |
| Ankyrin-1                             | Ank1   | ANK1_MOUSE      | 204 kDa | 0  | 0  | 0  | 2  | 0  | 0 |
| L-lactate dehydrogenase A chain       | Ldha   | LDHA_MOUSE      | 36 kDa  | 0  | 2  | 0  | 0  | 0  | 0 |
| NADH dehydrogenase [ubiquinone        | Ndufb5 | NDUB5_MOUSE     | 22 kDa  | 0  | 0  | 2  | 0  | 0  | 0 |
| Acyl-CoA dehydrogenase family m       | Acad9  | ACAD9_MOUSE     | 69 kDa  | 0  | 0  | 0  | 0  | 2  | 0 |
| Microsomal glutathione S-transfer     | Mgst3  | MGST3_MOUSE     | 17 kDa  | 0  | 0  | 0  | 1  | 1  | 0 |
| Sarcalumenin                          | Srl    | SRCA_MOUSE      | 99 kDa  | 0  | 2  | 0  | 0  | 0  | 0 |
| NADH-ubiquinone oxidoreductase        | Mtnd1  | NU1M_MOUSE      | 36 kDa  | 0  | 0  | 0  | 3  | 0  | 0 |
| Glycogen [starch] synthase, muscl     | Gys1   | GYS1_MOUSE      | 84 kDa  | 0  | 0  | 0  | 2  | 1  | 0 |
| Cytochrome b-c1 complex subunit       | Uqcrc2 | QCR2_MOUSE      | 48 kDa  | 2  | 0  | 0  | 2  | 0  | 0 |
| Laminin subunit beta-1                | Lamb1  | LAMB1_MOUSE     | 197 kDa | 4  | 0  | 0  | 0  | 0  | 0 |
| Glycogen phosphorylase, liver form    | Pygl   | PYGL_MOUSE      | 97 kDa  | 2  | 0  | 2  | 0  | 0  | 0 |
| Cytochrome c oxidase subunit ND       | Ndufa4 | NDUA4_MOUSE     | 9 kDa   | 0  | 0  | 0  | 2  | 2  | 0 |
| Parvalbumin alpha                     | Pvalb  | PRVA_MOUSE      | 12 kDa  | 0  | 0  | 0  | 0  | 4  | 0 |
| Mitochondrial carrier homolog 2       | Mtch2  | MTCH2_MOUSE     | 33 kDa  | 1  | 0  | 1  | 3  | 0  | 0 |
| NADH-ubiquinone oxidoreductase        | Mtnd4  | NU4M_MOUSE      | 52 kDa  | 0  | 1  | 1  | 3  | 0  | 0 |
| Phosphorylase b kinase regulatory     | Phka1  | KPB1_MOUSE      | 139 kDa | 3  | 2  | 0  | 0  | 0  | 0 |
| Sodium/potassium-transporting AT      | Atp1a2 | AT1A2_MOUSE     | 112 kDa | 0  | 0  | 0  | 4  | 1  | 0 |
| Vesicle-associated membrane pro       | Vapa   | VAPA_MOUSE      | 28 kDa  | 0  | 0  | 2  | 2  | 1  | 0 |
| Cytochrome c oxidase subunit 1        | Mtco1  | COX1_MOUSE      | 57 kDa  | 0  | 2  | 2  | 2  | 0  | 0 |

|                                                    |          |             |         |    |   |    |    |    |   |
|----------------------------------------------------|----------|-------------|---------|----|---|----|----|----|---|
| LIM domain-binding protein 3                       | Ldb3     | LDB3_MOUSE  | 76 kDa  | 0  | 0 | 0  | 3  | 3  | 0 |
| Very-long-chain enoyl-CoA reductase                | Teqr     | TECR_MOUSE  | 36 kDa  | 2  | 1 | 0  | 4  | 0  | 0 |
| Tubulin alpha-4A chain                             | Tuba4a   | TBA4A_MOUSE | 50 kDa  | 4  | 0 | 3  | 0  | 0  | 0 |
| Cytochrome c oxidase subunit 4 isozyme             | Cox4i1   | COX41_MOUSE | 20 kDa  | 0  | 0 | 0  | 6  | 2  | 0 |
| Myosin-binding protein C, fast-type 2              | Mybpc2   | MYPC2_MOUSE | 127 kDa | 6  | 0 | 2  | 0  | 0  | 0 |
| Protein-cysteine N-palmitoyltransferase            | Hhatl    | HHATL_MOUSE | 56 kDa  | 2  | 0 | 1  | 4  | 1  | 0 |
| NADH-ubiquinone oxidoreductase subunit 1           | Ndufs1   | NDUS1_MOUSE | 80 kDa  | 7  | 0 | 0  | 2  | 0  | 0 |
| ATP synthase subunit a                             | Mtstp6   | ATP6_MOUSE  | 25 kDa  | 2  | 3 | 4  | 0  | 0  | 0 |
| ATP synthase subunit f, mitochondrial              | Atp5j2   | ATPK_MOUSE  | 10 kDa  | 2  | 0 | 2  | 2  | 3  | 0 |
| Dystrophin                                         | Dmd      | DMD_MOUSE   | 426 kDa | 4  | 0 | 4  | 0  | 1  | 0 |
| Creatine kinase M-type                             | Ckm      | KCRM_MOUSE  | 43 kDa  | 2  | 4 | 0  | 1  | 2  | 0 |
| NADH dehydrogenase [ubiquinone] subunit 8          | Ndufb8   | NDUB8_MOUSE | 22 kDa  | 0  | 0 | 0  | 5  | 4  | 0 |
| Cytochrome b-c1 complex subunit 1                  | Uqcrc1   | QCR1_MOUSE  | 53 kDa  | 6  | 1 | 2  | 1  | 0  | 0 |
| Cytochrome c1, heme protein, mitochondrial         | Cyc1     | CY1_MOUSE   | 35 kDa  | 4  | 0 | 2  | 2  | 2  | 0 |
| Dihydrolipoyllysine-residue acetyltransferase      | Dlat     | ODP2_MOUSE  | 68 kDa  | 3  | 0 | 3  | 3  | 1  | 0 |
| Glycogen phosphorylase, muscle form                | Pygm     | PYGM_MOUSE  | 97 kDa  | 3  | 3 | 0  | 1  | 3  | 0 |
| NADH dehydrogenase [ubiquinone] subunit 3          | Ndufs3   | NDUS3_MOUSE | 30 kDa  | 4  | 0 | 2  | 2  | 4  | 0 |
| Myozenin-1                                         | Myoz1    | MYOZ1_MOUSE | 31 kDa  | 0  | 0 | 0  | 7  | 5  | 0 |
| Dehydrogenase/reductase SDR family                 | Dhrs7c   | DRS7C_MOUSE | 34 kDa  | 4  | 2 | 2  | 2  | 2  | 0 |
| Collagen alpha-1(XII) chain                        | Col12a1  | COCA1_MOUSE | 340 kDa | 6  | 2 | 1  | 0  | 4  | 0 |
| Laminin subunit gamma-1                            | Lamc1    | LAMC1_MOUSE | 177 kDa | 7  | 1 | 1  | 2  | 3  | 0 |
| Voltage-dependent anion-selective chloride channel | Vdac3    | VDAC3_MOUSE | 31 kDa  | 4  | 2 | 4  | 2  | 2  | 0 |
| Mitochondrial 2-oxoglutarate/malate translocase    | Slc25a11 | M2OM_MOUSE  | 34 kDa  | 3  | 0 | 5  | 4  | 3  | 0 |
| Carnitine O-palmitoyltransferase 1                 | Cpt1b    | CPT1B_MOUSE | 88 kDa  | 2  | 2 | 1  | 7  | 4  | 0 |
| NADH dehydrogenase [ubiquinone] subunit 2          | Ndufs2   | NDUS2_MOUSE | 53 kDa  | 4  | 2 | 6  | 1  | 3  | 0 |
| Myosin-8                                           | Myh8     | MYH8_MOUSE  | 223 kDa | 2  | 0 | 5  | 3  | 7  | 0 |
| Tubulin alpha-1C chain                             | Tuba1c   | TBA1C_MOUSE | 50 kDa  | 8  | 4 | 5  | 1  | 2  | 0 |
| Cartilage intermediate layer protein 2             | Cilp2    | CILP2_MOUSE | 126 kDa | 3  | 2 | 1  | 6  | 9  | 0 |
| Myelin protein P0                                  | Mpz      | MYP0_MOUSE  | 28 kDa  | 0  | 0 | 0  | 12 | 11 | 0 |
| Calcium-binding mitochondrial carrier              | Slc25a13 | CMC2_MOUSE  | 74 kDa  | 6  | 4 | 5  | 5  | 4  | 0 |
| Phosphate carrier protein, mitochondrial           | Slc25a3  | MPCP_MOUSE  | 40 kDa  | 2  | 1 | 2  | 11 | 9  | 0 |
| Laminin subunit alpha-2                            | Lama2    | LAMA2_MOUSE | 344 kDa | 11 | 0 | 3  | 5  | 7  | 0 |
| Trimeric intracellular cation channel              | Tmem38a  | TM38A_MOUSE | 33 kDa  | 5  | 4 | 8  | 4  | 5  | 0 |
| Reticulon-2                                        | Rtn2     | RTN2_MOUSE  | 51 kDa  | 8  | 6 | 9  | 5  | 7  | 0 |
| Calcium-binding mitochondrial carrier              | Slc25a12 | CMC1_MOUSE  | 75 kDa  | 11 | 6 | 13 | 4  | 10 | 0 |

| Liver                                             |          |                  |                  | CNBr    |         |         | NH <sub>2</sub> OH |         |         |
|---------------------------------------------------|----------|------------------|------------------|---------|---------|---------|--------------------|---------|---------|
| Identified Proteins                               | Gene     | Accession Number | Molecular Weight | Liver 1 | Liver 2 | Liver 3 | Liver 1            | Liver 2 | Liver 3 |
| Collagen alpha-1(I) chain                         | Col1a1   | CO1A1_MOUSE      | 138 kDa          | 466     | 317     | 347     | 195                | 220     | 246     |
| Collagen alpha-2(I) chain                         | Col1a2   | CO1A2_MOUSE      | 130 kDa          | 302     | 208     | 211     | 104                | 122     | 150     |
| Collagen alpha-1(III) chain                       | Col3a1   | CO3A1_MOUSE      | 139 kDa          | 227     | 204     | 250     | 123                | 145     | 110     |
| Carbamoyl-phosphate synthase [amino] cytosolic    | Cps1     | CPSM_MOUSE       | 165 kDa          | 102     | 174     | 174     | 47                 | 48      | 57      |
| Plectin                                           | Plec     | PLEC_MOUSE       | 534 kDa          | 138     | 114     | 112     | 54                 | 86      | 52      |
| Sarcoplasmic/endoplasmic reticulum chaperone      | Atp2a1   | AT2A1_MOUSE      | 109 kDa          | 111     | 167     | 101     | 1                  | 40      | 33      |
| Uricase                                           | Uox      | URIC_MOUSE       | 35 kDa           | 71      | 81      | 97      | 23                 | 29      | 30      |
| ADP/ATP translocase 1                             | Slc25a4  | ADT1_MOUSE       | 33 kDa           | 77      | 109     | 89      | 18                 | 47      | 28      |
| Keratin, type I cytoskeletal 18                   | Krt18    | K1C18_MOUSE      | 48 kDa           | 104     | 99      | 105     | 29                 | 30      | 27      |
| Actin, alpha skeletal muscle                      | Acta1    | ACTS_MOUSE       | 42 kDa           | 75      | 122     | 101     | 6                  | 37      | 25      |
| Calcium-binding mitochondrial carrier             | Slc25a13 | CMC2_MOUSE       | 74 kDa           | 83      | 101     | 129     | 20                 | 26      | 25      |
| ADP/ATP translocase 2                             | Slc25a5  | ADT2_MOUSE       | 33 kDa           | 34      | 47      | 70      | 19                 | 22      | 24      |
| Keratin, type II cytoskeletal 8                   | Krt8     | K2C8_MOUSE       | 55 kDa           | 120     | 110     | 109     | 35                 | 33      | 23      |
| Band 3 anion transport protein                    | Slc4a1   | B3AT_MOUSE       | 103 kDa          | 21      | 25      | 32      | 16                 | 20      | 22      |
| Microsomal glutathione S-transferase 2            | Mgst1    | MGST1_MOUSE      | 18 kDa           | 26      | 44      | 44      | 20                 | 28      | 22      |
| Cytochrome c oxidase subunit 2                    | Mtco2    | COX2_MOUSE       | 26 kDa           | 32      | 46      | 44      | 12                 | 26      | 21      |
| Collagen alpha-1(VI) chain                        | Col6a1   | CO6A1_MOUSE      | 108 kDa          | 70      | 53      | 54      | 22                 | 18      | 20      |
| Titin                                             | Ttn      | TITIN_MOUSE      | 3906 kDa         | 218     | 428     | 236     | 0                  | 134     | 20      |
| Desmoplakin                                       | Dsp      | DESP_MOUSE       | 333 kDa          | 32      | 31      | 25      | 13                 | 27      | 17      |
| Alpha-actinin-2                                   | Actn2    | ACTN2_MOUSE      | 104 kDa          | 49      | 78      | 55      | 0                  | 28      | 17      |
| Epiplakin                                         | Eppk1    | EPIPL_MOUSE      | 725 kDa          | 24      | 22      | 28      | 7                  | 22      | 16      |
| Tubulin alpha-1C chain                            | Tuba1c   | TBA1C_MOUSE      | 50 kDa           | 61      | 63      | 71      | 10                 | 22      | 16      |
| Dolichyl-diphosphooligosaccharide transferase     | Rpn1     | RPN1_MOUSE       | 69 kDa           | 47      | 58      | 74      | 19                 | 24      | 15      |
| Phosphate carrier protein, mitochondrial          | Slc25a3  | MPCP_MOUSE       | 40 kDa           | 20      | 38      | 43      | 9                  | 18      | 14      |
| Cytosolic 10-formyltetrahydrofolate dehydrogenase | Aldh1l1  | AL1L1_MOUSE      | 99 kDa           | 18      | 50      | 44      | 7                  | 13      | 14      |
| Myosin-1                                          | Myh1     | MYH1_MOUSE       | 223 kDa          | 132     | 201     | 125     | 0                  | 32      | 14      |
| MICOS complex subunit Mic60                       | Immt     | MIC60_MOUSE      | 84 kDa           | 21      | 25      | 44      | 15                 | 10      | 13      |
| Mitochondrial carrier homolog 2                   | Mtch2    | MTCH2_MOUSE      | 33 kDa           | 30      | 39      | 48      | 11                 | 15      | 13      |
| Keratin, type I cytoskeletal 10                   | Krt10    | K1C10_MOUSE      | 58 kDa           | 8       | 3       | 13      | 11                 | 9       | 12      |

|                                     |          |             |         |     |     |     |    |    |    |
|-------------------------------------|----------|-------------|---------|-----|-----|-----|----|----|----|
| Long-chain-fatty-acid--CoA ligase   | Acs1     | ACSL1_MOUSE | 78 kDa  | 19  | 40  | 34  | 3  | 9  | 12 |
| Dolichyl-diphosphooligosaccharide   | Rpn2     | RPN2_MOUSE  | 69 kDa  | 32  | 44  | 49  | 7  | 15 | 12 |
| Myosin-4                            | Myh4     | MYH4_MOUSE  | 223 kDa | 191 | 289 | 193 | 2  | 43 | 12 |
| Collagen alpha-1(IV) chain          | Col4a1   | CO4A1_MOUSE | 161 kDa | 27  | 27  | 27  | 9  | 11 | 11 |
| 40S ribosomal protein S2            | Rps2     | RS2_MOUSE   | 31 kDa  | 10  | 10  | 12  | 5  | 9  | 10 |
| 3-ketoacyl-CoA thiolase, mitochon   | Acaa2    | THIM_MOUSE  | 42 kDa  | 14  | 18  | 13  | 1  | 9  | 10 |
| Mitochondrial ornithine transporter | Slc25a15 | ORNT1_MOUSE | 33 kDa  | 7   | 12  | 20  | 9  | 12 | 10 |
| Fibronectin                         | Fn1      | FINC_MOUSE  | 273 kDa | 36  | 27  | 27  | 10 | 18 | 10 |
| Tubulin beta-5 chain                | Tubb5    | TBB5_MOUSE  | 50 kDa  | 51  | 41  | 56  | 11 | 9  | 10 |
| Hemoglobin subunit beta-1           | Hbb-b1   | HBB1_MOUSE  | 16 kDa  | 7   | 26  | 20  | 8  | 9  | 9  |
| Collagen alpha-2(IV) chain          | Col4a2   | CO4A2_MOUSE | 167 kDa | 29  | 26  | 27  | 10 | 12 | 9  |
| Argininosuccinate synthase          | Ass1     | ASSY_MOUSE  | 47 kDa  | 18  | 23  | 31  | 7  | 11 | 8  |
| Collagen alpha-2(VI) chain          | Col6a2   | CO6A2_MOUSE | 110 kDa | 55  | 43  | 44  | 7  | 10 | 8  |
| Ubiquitin-60S ribosomal protein L4  | Uba52    | RL40_MOUSE  | 15 kDa  | 11  | 12  | 10  | 5  | 7  | 7  |
| Very-long-chain enoyl-CoA reduct    | Tecr     | TECR_MOUSE  | 36 kDa  | 12  | 18  | 19  | 5  | 8  | 7  |
| Cytochrome c1, heme protein, mit    | Cyc1     | CY1_MOUSE   | 35 kDa  | 12  | 15  | 20  | 5  | 11 | 7  |
| Tricarboxylate transport protein, m | Slc25a1  | TXTP_MOUSE  | 34 kDa  | 9   | 16  | 29  | 8  | 10 | 7  |
| Retinol dehydrogenase 7             | Rdh7     | RDH7_MOUSE  | 36 kDa  | 17  | 36  | 27  | 2  | 5  | 7  |
| Mitochondrial carnitine/acylcarniti | Slc25a20 | MCAT_MOUSE  | 33 kDa  | 19  | 28  | 28  | 2  | 11 | 7  |
| Cytochrome b5 type B                | Cyb5b    | CYB5B_MOUSE | 16 kDa  | 4   | 4   | 5   | 7  | 8  | 6  |
| Calnexin                            | Canx     | CALX_MOUSE  | 67 kDa  | 4   | 9   | 8   | 6  | 2  | 6  |
| Kynurenine 3-monooxygenase          | Kmo      | KMO_MOUSE   | 55 kDa  | 6   | 11  | 9   | 1  | 8  | 6  |
| 3-beta-hydroxysteroid-Delta(8),De   | Ebp      | EBP_MOUSE   | 26 kDa  | 7   | 8   | 12  | 5  | 7  | 6  |
| NADH-ubiquinone oxidoreductase      | Ndufs1   | NDUS1_MOUSE | 80 kDa  | 6   | 13  | 25  | 2  | 3  | 6  |
| Mitochondrial amidoxime-reducing    | 1-Mar    | MARC1_MOUSE | 38 kDa  | 10  | 11  | 15  | 4  | 9  | 6  |
| Cytochrome P450 2C40                | Cyp2c40  | CP240_MOUSE | 56 kDa  | 8   | 23  | 18  | 0  | 6  | 6  |
| NADH dehydrogenase [ubiquinone      | Ndufs2   | NDUS2_MOUSE | 53 kDa  | 11  | 17  | 20  | 2  | 6  | 6  |
| Membrane-associated progesteron     | Pgrmc1   | PGRC1_MOUSE | 22 kDa  | 10  | 19  | 20  | 4  | 7  | 6  |
| Junction plakoglobin                | Jup      | PLAK_MOUSE  | 82 kDa  | 18  | 16  | 15  | 5  | 8  | 6  |
| UDP-glucuronosyltransferase 1-1     | Ugt1a1   | UD11_MOUSE  | 60 kDa  | 10  | 23  | 20  | 4  | 10 | 6  |
| Prohibitin                          | Phb      | PHB_MOUSE   | 30 kDa  | 10  | 21  | 26  | 4  | 6  | 6  |
| Cytochrome P450 2C29                | Cyp2c29  | CP2CT_MOUSE | 56 kDa  | 15  | 31  | 30  | 1  | 4  | 6  |
| Fibrinogen gamma chain              | Fgg      | FIBG_MOUSE  | 49 kDa  | 39  | 15  | 17  | 6  | 6  | 6  |
| 60S ribosomal protein L7a           | Rpl7a    | RL7A_MOUSE  | 30 kDa  | 21  | 25  | 27  | 8  | 4  | 6  |
| Actin, cytoplasmic 1                | Actb     | ACTB_MOUSE  | 42 kDa  | 33  | 40  | 47  | 4  | 7  | 6  |
| Alcohol dehydrogenase 1             | Adh1     | ADH1_MOUSE  | 40 kDa  | 28  | 56  | 54  | 2  | 5  | 6  |
| Gap junction beta-1 protein         | Gjb1     | CXB1_MOUSE  | 32 kDa  | 0   | 0   | 1   | 3  | 7  | 5  |
| Trifunctional enzyme subunit alpha  | Hadha    | ECHA_MOUSE  | 83 kDa  | 2   | 5   | 8   | 2  | 3  | 5  |
| Keratin, type II cytoskeletal 5     | Krt5     | K2C5_MOUSE  | 62 kDa  | 4   | 4   | 7   | 9  | 7  | 5  |
| NADH dehydrogenase [ubiquinone      | Ndufa9   | NDUA9_MOUSE | 43 kDa  | 9   | 10  | 17  | 0  | 9  | 5  |
| Protein transport protein Sec61 su  | Sec61a1  | S61A1_MOUSE | 52 kDa  | 5   | 16  | 18  | 2  | 6  | 5  |
| Cytochrome b5                       | Cyb5a    | CYB5_MOUSE  | 15 kDa  | 6   | 14  | 18  | 4  | 5  | 5  |
| Cadherin-2                          | Cdh2     | CADH2_MOUSE | 100 kDa | 14  | 15  | 12  | 2  | 8  | 5  |
| Elastin                             | Eln      | ELN_MOUSE   | 72 kDa  | 15  | 15  | 17  | 5  | 9  | 5  |
| Fatty acid synthase                 | Fasn     | FAS_MOUSE   | 272 kDa | 16  | 30  | 15  | 2  | 2  | 5  |
| Heat shock protein HSP 90-beta      | Hsp90ab1 | HS90B_MOUSE | 83 kDa  | 12  | 26  | 22  | 5  | 3  | 5  |
| Arginase-1                          | Arg1     | ARG1_MOUSE  | 35 kDa  | 15  | 19  | 20  | 5  | 11 | 5  |
| Cytochrome c oxidase subunit 4 is   | Cox4i1   | COX41_MOUSE | 20 kDa  | 17  | 25  | 25  | 2  | 7  | 5  |
| NADH-cytochrome b5 reductase 3      | Cyb5r3   | NB5R3_MOUSE | 34 kDa  | 11  | 39  | 28  | 1  | 2  | 5  |
| 60S ribosomal protein L10a          | Rpl10a   | RL10A_MOUSE | 25 kDa  | 34  | 27  | 31  | 2  | 8  | 5  |
| Protein-glutamine gamma-glutamyl    | Tgm2     | TGM2_MOUSE  | 77 kDa  | 39  | 34  | 37  | 8  | 8  | 5  |
| Keratin, type I cytoskeletal 14     | Krt14    | K1C14_MOUSE | 53 kDa  | 0   | 0   | 2   | 3  | 5  | 4  |
| Sorting and assembly machinery c    | Samm50   | SAM50_MOUSE | 52 kDa  | 1   | 0   | 3   | 2  | 4  | 4  |
| Glutathione S-transferase Mu 7      | Gstm7    | GSTM7_MOUSE | 26 kDa  | 2   | 3   | 5   | 2  | 2  | 4  |
| Cytochrome P450 2C37                | Cyp2c37  | CP237_MOUSE | 56 kDa  | 3   | 6   | 4   | 1  | 2  | 4  |
| Spectrin alpha chain, erythrocytic  | Spta1    | SPTA1_MOUSE | 280 kDa | 5   | 2   | 7   | 1  | 3  | 4  |
| UDP-glucuronosyltransferase 2B1     | Ugt2b17  | UDB17_MOUSE | 61 kDa  | 3   | 9   | 6   | 1  | 1  | 4  |
| Transmembrane protein 256           | Tmem256  | TM256_MOUSE | 12 kDa  | 4   | 6   | 7   | 0  | 3  | 4  |
| Solute carrier organic anion transp | Slco1b2  | SO1B2_MOUSE | 77 kDa  | 4   | 4   | 4   | 4  | 4  | 4  |
| Keratin, type II cytoskeletal 79    | Krt79    | K2C79_MOUSE | 58 kDa  | 4   | 4   | 5   | 4  | 4  | 4  |
| Regulator of microtubule dynamics   | Rmdn3    | RMD3_MOUSE  | 52 kDa  | 3   | 3   | 12  | 4  | 3  | 4  |
| Corticosteroid 11-beta-dehydrogen   | Hsd11b1  | DH11_MOUSE  | 32 kDa  | 2   | 13  | 7   | 1  | 3  | 4  |
| 60S ribosomal protein L4            | Rpl4     | RL4_MOUSE   | 47 kDa  | 3   | 8   | 8   | 4  | 5  | 4  |
| 60S ribosomal protein L15           | Rpl15    | RL15_MOUSE  | 24 kDa  | 8   | 6   | 7   | 3  | 4  | 4  |
| Tubulin beta-4B chain               | Tubb4b   | TBB4B_MOUSE | 50 kDa  | 12  | 8   | 7   | 1  | 1  | 4  |
| Spectrin beta chain, erythrocytic   | Sptb     | SPTB1_MOUSE | 245 kDa | 4   | 7   | 7   | 3  | 11 | 4  |
| Alpha-actinin-3                     | Actn3    | ACTN3_MOUSE | 103 kDa | 9   | 13  | 10  | 1  | 4  | 4  |
| Hemoglobin subunit alpha            | Hba      | HBA_MOUSE   | 15 kDa  | 5   | 14  | 14  | 2  | 4  | 4  |



|                                                                   |          |             |         |    |    |    |    |    |   |
|-------------------------------------------------------------------|----------|-------------|---------|----|----|----|----|----|---|
| Translocon-associated protein subunit 4                           | Ssr4     | SSRD_MOUSE  | 19 kDa  | 8  | 13 | 16 | 2  | 4  | 4 |
| Galectin-9                                                        | Lgals9   | LEG9_MOUSE  | 40 kDa  | 10 | 9  | 19 | 3  | 6  | 4 |
| Dolichyl-diphosphooligosaccharide 4-epimerase                     | Stt3a    | STT3A_MOUSE | 81 kDa  | 5  | 15 | 16 | 6  | 6  | 4 |
| Solute carrier family 2, facilitated glucose transporter member 2 | Slc2a2   | GTR2_MOUSE  | 57 kDa  | 9  | 16 | 15 | 4  | 5  | 4 |
| Catenin beta-1                                                    | Ctnnb1   | CTNB1_MOUSE | 85 kDa  | 17 | 13 | 12 | 4  | 6  | 4 |
| Mitochondrial dicarboxylate carrier 1                             | Slc25a10 | DIC_MOUSE   | 32 kDa  | 9  | 14 | 20 | 6  | 4  | 4 |
| Dolichyl-diphosphooligosaccharide 4-epimerase                     | Ddost    | OST48_MOUSE | 49 kDa  | 20 | 21 | 23 | 4  | 8  | 4 |
| Cytochrome P450 2A12                                              | Cyp2a12  | CP2AC_MOUSE | 56 kDa  | 19 | 34 | 25 | 2  | 4  | 4 |
| Mitochondrial 2-oxoglutarate/malate carrier 1                     | Slc25a11 | M2OM_MOUSE  | 34 kDa  | 24 | 34 | 36 | 3  | 4  | 4 |
| ATP synthase subunit alpha, mitochondrial                         | Atp5a1   | ATPA_MOUSE  | 60 kDa  | 27 | 53 | 54 | 1  | 1  | 4 |
| Voltage-dependent anion-selective chloride channel 1              | Vdac1    | VDAC1_MOUSE | 32 kDa  | 34 | 43 | 46 | 8  | 6  | 4 |
| Myosin-9                                                          | Myh9     | MYH9_MOUSE  | 226 kDa | 45 | 58 | 79 | 11 | 15 | 4 |
| Keratin, type II cytoskeletal 2 epidermal                         | Krt2     | K22E_MOUSE  | 71 kDa  | 0  | 0  | 2  | 1  | 4  | 3 |
| Alpha-actinin-1                                                   | Actn1    | ACTN1_MOUSE | 103 kDa | 0  | 2  | 1  | 1  | 4  | 3 |
| UDP-glucuronosyltransferase 2A3                                   | Ugt2a3   | UD2A3_MOUSE | 61 kDa  | 3  | 6  | 5  | 1  | 2  | 3 |
| Histone H3.1                                                      | Hist1h3a | H31_MOUSE   | 15 kDa  | 3  | 4  | 5  | 4  | 4  | 3 |
| Cytochrome P450 2F2                                               | Cyp2f2   | CP2F2_MOUSE | 56 kDa  | 2  | 12 | 6  | 0  | 1  | 3 |
| DnaJ homolog subfamily C member 1                                 | Dnajc11  | DJC11_MOUSE | 63 kDa  | 2  | 2  | 11 | 1  | 6  | 3 |
| NADH dehydrogenase [ubiquinone] 1, 1.3.1.2                        | Ndubf5   | NDUB5_MOUSE | 22 kDa  | 9  | 8  | 5  | 0  | 2  | 3 |
| Catenin delta-1                                                   | Ctnnd1   | CTND1_MOUSE | 105 kDa | 6  | 6  | 10 | 1  | 3  | 3 |
| 60S ribosomal protein L27a                                        | Rpl27a   | RL27A_MOUSE | 17 kDa  | 6  | 8  | 5  | 3  | 4  | 3 |
| Cytochrome c oxidase subunit 1                                    | Mtco1    | COX1_MOUSE  | 57 kDa  | 11 | 17 | 15 | 0  | 3  | 3 |
| Protein transport protein Sec23A                                  | Sec23a   | SC23A_MOUSE | 86 kDa  | 16 | 13 | 19 | 3  | 2  | 3 |
| Sarcoplasmic/endoplasmic reticulum chaperone                      | Atp2a2   | AT2A2_MOUSE | 115 kDa | 11 | 19 | 19 | 2  | 5  | 3 |
| Prohibitin-2                                                      | Phb2     | PHB2_MOUSE  | 33 kDa  | 10 | 17 | 24 | 4  | 5  | 3 |
| Fibrinogen alpha chain                                            | Fga      | FIBA_MOUSE  | 87 kDa  | 37 | 15 | 14 | 3  | 6  | 3 |
| Histone H4                                                        | Hist1h4a | H4_MOUSE    | 11 kDa  | 18 | 23 | 24 | 4  | 7  | 3 |
| Bile acyl-CoA synthetase                                          | Slc27a5  | S27A5_MOUSE | 76 kDa  | 20 | 24 | 25 | 5  | 8  | 3 |
| Cytochrome b-c1 complex subunit 1                                 | Uqcrc1   | QCR1_MOUSE  | 53 kDa  | 33 | 34 | 52 | 4  | 5  | 3 |
| Clathrin heavy chain 1                                            | Cltc     | CLH1_MOUSE  | 192 kDa | 35 | 54 | 48 | 0  | 1  | 3 |
| Lamin-B1                                                          | Lmnb1    | LMNB1_MOUSE | 67 kDa  | 0  | 1  | 1  | 2  | 1  | 2 |
| Heterogeneous nuclear ribonucleoprotein A1                        | Hnrnpk   | HNRPK_MOUSE | 51 kDa  | 0  | 0  | 2  | 2  | 2  | 2 |
| Microsomal glutathione S-transferase 3                            | Mgst3    | MGST3_MOUSE | 17 kDa  | 0  | 2  | 0  | 2  | 2  | 2 |
| Keratin, type II cuticular Hb5                                    | Krt85    | KRT85_MOUSE | 56 kDa  | 0  | 1  | 2  | 3  | 2  | 2 |
| Dolichyl-diphosphooligosaccharide 4-epimerase                     | Stt3b    | STT3B_MOUSE | 93 kDa  | 0  | 0  | 2  | 1  | 5  | 2 |
| Succinate dehydrogenase cytochrome b558                           | Sdhc     | C560_MOUSE  | 18 kDa  | 0  | 2  | 2  | 2  | 2  | 2 |
| Probable N-acetyltransferase CML1                                 | Cml2     | CMLO2_MOUSE | 26 kDa  | 0  | 3  | 3  | 0  | 3  | 2 |
| MICOS complex subunit Mic27                                       | Apool    | MIC27_MOUSE | 29 kDa  | 2  | 1  | 5  | 0  | 1  | 2 |
| 60S ribosomal protein L24                                         | Rpl24    | RL24_MOUSE  | 18 kDa  | 1  | 2  | 3  | 2  | 2  | 2 |
| Biglycan                                                          | Bgn      | PGS1_MOUSE  | 42 kDa  | 3  | 2  | 2  | 2  | 2  | 2 |
| Protein transport protein Sec31A                                  | Sec31a   | SC31A_MOUSE | 134 kDa | 2  | 4  | 2  | 1  | 2  | 2 |
| Cytochrome P450 4A14                                              | Cyp4a14  | CP4AE_MOUSE | 59 kDa  | 2  | 4  | 5  | 0  | 1  | 2 |
| Collagen alpha-1(I) chain                                         | Col2a1   | CO2A1_MOUSE | 142 kDa | 3  | 2  | 2  | 4  | 5  | 2 |
| ATP-citrate synthase                                              | Acly     | ACLY_MOUSE  | 120 kDa | 3  | 7  | 6  | 0  | 0  | 2 |
| Regulator of microtubule dynamics 2                               | Rmdn2    | RMD2_MOUSE  | 47 kDa  | 4  | 5  | 7  | 0  | 0  | 2 |
| EMILIN-1                                                          | Emilin1  | EMIL1_MOUSE | 108 kDa | 5  | 3  | 5  | 2  | 2  | 2 |
| Adenosylhomocysteinase                                            | Ahcy     | SAHH_MOUSE  | 48 kDa  | 1  | 8  | 8  | 0  | 0  | 2 |
| Desmoglein-2                                                      | Dsg2     | DSG2_MOUSE  | 122 kDa | 6  | 3  | 3  | 2  | 3  | 2 |
| Dimethylalanine monooxygenase [NAD(P)H-dependent]                 | Fmo5     | FMO5_MOUSE  | 60 kDa  | 4  | 6  | 6  | 0  | 2  | 2 |
| Sideroflexin-1                                                    | Sfxn1    | SFXN1_MOUSE | 36 kDa  | 5  | 5  | 7  | 1  | 1  | 2 |
| Oligosaccharyltransferase complex subunit 1                       | Ostc     | OSTC_MOUSE  | 17 kDa  | 4  | 6  | 6  | 2  | 2  | 2 |
| Basigin                                                           | Bsg      | BASI_MOUSE  | 42 kDa  | 2  | 4  | 6  | 4  | 4  | 2 |
| 60S ribosomal protein L3                                          | Rpl3     | RL3_MOUSE   | 46 kDa  | 4  | 7  | 5  | 3  | 2  | 2 |
| Dolichyl-diphosphooligosaccharide 4-epimerase                     | Dad1     | DAD1_MOUSE  | 12 kDa  | 4  | 7  | 6  | 0  | 5  | 2 |
| Mitochondrial amidoxime reductase 2-Mar                           | Marc2    | MARC2_MOUSE | 38 kDa  | 4  | 9  | 7  | 2  | 2  | 2 |
| Bile salt export pump                                             | Abcb11   | ABCBB_MOUSE | 147 kDa | 4  | 8  | 8  | 2  | 2  | 2 |
| Very-long-chain (3R)-3-hydroxyacyl-CoA oxidase                    | Hacd3    | HACD3_MOUSE | 43 kDa  | 3  | 6  | 9  | 2  | 4  | 2 |
| 60S ribosomal protein L14                                         | Rpl14    | RL14_MOUSE  | 24 kDa  | 5  | 10 | 5  | 2  | 2  | 2 |
| Keratin, type II cytoskeletal 1                                   | Krt1     | K2C1_MOUSE  | 66 kDa  | 5  | 6  | 10 | 2  | 2  | 2 |
| Sodium/bile acid cotransporter                                    | Slc10a1  | NTCP_MOUSE  | 39 kDa  | 4  | 9  | 8  | 2  | 2  | 2 |
| Elongation factor 1-alpha 1                                       | Eef1a1   | EF1A1_MOUSE | 50 kDa  | 4  | 9  | 9  | 2  | 2  | 2 |
| Cytochrome c oxidase subunit 7A2                                  | Cox7a2   | CX7A2_MOUSE | 9 kDa   | 7  | 6  | 9  | 2  | 2  | 2 |
| Sodium-coupled neutral amino acid transporter 3                   | Slc38a3  | S38A3_MOUSE | 56 kDa  | 5  | 9  | 14 | 0  | 1  | 2 |
| Serum paraoxonase/arylesterase 1                                  | Pon1     | PON1_MOUSE  | 40 kDa  | 6  | 13 | 9  | 2  | 2  | 2 |
| Collagen alpha-2(V) chain                                         | Col5a2   | CO5A2_MOUSE | 145 kDa | 12 | 7  | 8  | 1  | 6  | 2 |
| Amine oxidase [flavin-containing] B                               | Maob     | AOFB_MOUSE  | 59 kDa  | 4  | 13 | 20 | 2  | 3  | 2 |
| Mitochondrial glutamate carrier 1                                 | Slc25a22 | GHC1_MOUSE  | 35 kDa  | 10 | 10 | 17 | 1  | 4  | 2 |
| Transmembrane protein 14C                                         | Tmem14c  | TM14C_MOUSE | 12 kDa  | 12 | 12 | 15 | 2  | 2  | 2 |

|                                      |           |             |         |    |    |    |   |   |   |
|--------------------------------------|-----------|-------------|---------|----|----|----|---|---|---|
| Spectrin beta chain, non-erythrocyt  | Sptbn1    | SPTB2_MOUSE | 274 kDa | 16 | 10 | 15 | 1 | 2 | 2 |
| Voltage-dependent anion-selective    | Vdac3     | VDAC3_MOUSE | 31 kDa  | 11 | 17 | 21 | 2 | 1 | 2 |
| Mitochondrial pyruvate carrier 2     | Mpc2      | MPC2_MOUSE  | 14 kDa  | 16 | 17 | 22 | 0 | 3 | 2 |
| NADH dehydrogenase [ubiquinone]      | Ndufs3    | NDUS3_MOUSE | 30 kDa  | 18 | 17 | 23 | 0 | 4 | 2 |
| Betaine--homocysteine S-methyltr     | Bhmt      | BHMT1_MOUSE | 45 kDa  | 9  | 30 | 28 | 3 | 3 | 2 |
| ATP-binding cassette sub-family D    | Abcd3     | ABCD3_MOUSE | 75 kDa  | 18 | 36 | 33 | 2 | 7 | 2 |
| Acyl carrier protein, mitochondrial  | Ndufab1   | ACPM_MOUSE  | 17 kDa  | 0  | 0  | 0  | 1 | 4 | 1 |
| Calmin                               | Clmn      | CLMN_MOUSE  | 117 kDa | 2  | 1  | 1  | 1 | 1 | 1 |
| Sulfide:quinone oxidoreductase, m    | Sqrdl     | SQRD_MOUSE  | 50 kDa  | 0  | 1  | 5  | 0 | 0 | 1 |
| Fructose-bisphosphate aldolase B     | Aldob     | ALDOB_MOUSE | 40 kDa  | 0  | 4  | 0  | 0 | 2 | 1 |
| Cytochrome P450 2C54                 | Cyp2c54   | CP254_MOUSE | 56 kDa  | 2  | 3  | 4  | 0 | 0 | 1 |
| Acyl-CoA dehydrogenase family m      | Acad9     | ACAD9_MOUSE | 69 kDa  | 2  | 3  | 5  | 0 | 0 | 1 |
| Glycogen [starch] synthase, liver    | Gys2      | GYS2_MOUSE  | 81 kDa  | 3  | 3  | 4  | 0 | 0 | 1 |
| Prelamin-A/C                         | Lmna      | LMNA_MOUSE  | 74 kDa  | 2  | 3  | 3  | 1 | 2 | 1 |
| Keratin, type II cytoskeletal 1b     | Krt77     | K2C1B_MOUSE | 61 kDa  | 2  | 2  | 4  | 2 | 2 | 1 |
| Alpha-mannosidase 2                  | Man2a1    | MA2A1_MOUSE | 132 kDa | 2  | 5  | 5  | 1 | 1 | 1 |
| Vesicle-associated membrane pro      | Vapa      | VAPA_MOUSE  | 28 kDa  | 4  | 2  | 5  | 1 | 2 | 1 |
| ATP-dependent RNA helicase DD        | Ddx3y     | DDX3Y_MOUSE | 73 kDa  | 5  | 4  | 5  | 0 | 1 | 1 |
| Solute carrier family 22 member 2    | Slc22a27  | S22AR_MOUSE | 62 kDa  | 5  | 2  | 6  | 0 | 2 | 1 |
| Protein transport protein Sec61 su   | Sec61b    | SC61B_MOUSE | 10 kDa  | 2  | 5  | 6  | 2 | 2 | 1 |
| Hydroxymethylglutaryl-CoA syntha     | Hmgcs2    | HMCS2_MOUSE | 57 kDa  | 3  | 8  | 7  | 0 | 1 | 1 |
| Collagen alpha-1(V) chain            | Col5a1    | CO5A1_MOUSE | 184 kDa | 7  | 5  | 6  | 2 | 3 | 1 |
| Histone H2A type 1-F                 | Hist1h2af | H2A1F_MOUSE | 14 kDa  | 4  | 9  | 6  | 2 | 2 | 1 |
| Surfeit locus protein 4              | Surf4     | SURF4_MOUSE | 30 kDa  | 5  | 8  | 7  | 2 | 2 | 1 |
| Cytochrome P450 1A2                  | Cyp1a2    | CP1A2_MOUSE | 58 kDa  | 6  | 10 | 9  | 0 | 0 | 1 |
| Glyceraldehyde-3-phosphate dehy      | Gapdh     | G3P_MOUSE   | 36 kDa  | 2  | 11 | 12 | 0 | 1 | 1 |
| Histone H2B type 1-B                 | Hist1h2bb | H2B1B_MOUSE | 14 kDa  | 6  | 10 | 10 | 0 | 1 | 1 |
| Very long-chain acyl-CoA syntheta    | Slc27a2   | S27A2_MOUSE | 70 kDa  | 3  | 14 | 8  | 0 | 2 | 1 |
| Fatty aldehyde dehydrogenase         | Aldh3a2   | AL3A2_MOUSE | 54 kDa  | 3  | 13 | 10 | 0 | 1 | 1 |
| ATP synthase F(0) complex subun      | Atp5f1    | AT5F1_MOUSE | 29 kDa  | 6  | 9  | 7  | 3 | 4 | 1 |
| Cytochrome P450 2D10                 | Cyp2d10   | CP2DA_MOUSE | 57 kDa  | 9  | 13 | 7  | 0 | 0 | 1 |
| NADH-ubiquinone oxidoreductase       | Mtnd4     | NU4M_MOUSE  | 52 kDa  | 7  | 9  | 11 | 0 | 3 | 1 |
| NADH dehydrogenase [ubiquinone]      | Ndufv1    | NDUV1_MOUSE | 51 kDa  | 6  | 7  | 14 | 0 | 3 | 1 |
| NADH-ubiquinone oxidoreductase       | Mtnd1     | NU1M_MOUSE  | 36 kDa  | 6  | 10 | 11 | 0 | 4 | 1 |
| Dimethylaniline monooxygenase [I     | Fmo3      | FMO3_MOUSE  | 61 kDa  | 6  | 12 | 13 | 0 | 0 | 1 |
| 60S ribosomal protein L18            | Rpl18     | RL18_MOUSE  | 22 kDa  | 8  | 10 | 12 | 1 | 4 | 1 |
| Putative helicase MOV-10             | Mov10     | MOV10_MOUSE | 114 kDa | 15 | 11 | 15 | 0 | 0 | 1 |
| Long-chain-fatty-acid--CoA ligase    | Acsl5     | ACSL5_MOUSE | 76 kDa  | 7  | 22 | 15 | 0 | 0 | 1 |
| Pyruvate carboxylase, mitochondr     | Pc        | PYC_MOUSE   | 130 kDa | 10 | 22 | 16 | 0 | 1 | 1 |
| Voltage-dependent anion-selective    | Vdac2     | VDAC2_MOUSE | 32 kDa  | 16 | 21 | 19 | 2 | 1 | 1 |
| Cytochrome P450 2D26                 | Cyp2d26   | CP2DQ_MOUSE | 57 kDa  | 12 | 33 | 16 | 2 | 0 | 1 |
| Vimentin                             | Vim       | VIME_MOUSE  | 54 kDa  | 24 | 25 | 20 | 5 | 5 | 1 |
| Cytochrome b-c1 complex subunit      | Uqcrc2    | QCR2_MOUSE  | 48 kDa  | 27 | 33 | 50 | 2 | 2 | 1 |
| Collagen alpha-1(XII) chain          | Col12a1   | COCA1_MOUSE | 340 kDa | 1  | 0  | 0  | 0 | 0 | 0 |
| Trimeric intracellular cation channe | Tmem38a   | TM38A_MOUSE | 33 kDa  | 0  | 1  | 0  | 0 | 0 | 0 |
| Myozenin-1                           | Myoz1     | MYOZ1_MOUSE | 31 kDa  | 0  | 1  | 0  | 0 | 0 | 0 |
| Integrin beta-1                      | Itgb1     | ITB1_MOUSE  | 88 kDa  | 0  | 1  | 0  | 0 | 0 | 0 |
| Glycogen [starch] synthase, muscul   | Gys1      | GYS1_MOUSE  | 84 kDa  | 0  | 1  | 0  | 0 | 0 | 0 |
| Keratin, type II cuticular 87        | Krt87     | KRT87_MOUSE | 55 kDa  | 0  | 0  | 2  | 0 | 0 | 0 |
| Ryanodine receptor 1                 | Ryr1      | RYR1_MOUSE  | 565 kDa | 1  | 1  | 0  | 0 | 0 | 0 |
| Keratin, type I cytoskeletal 16      | Krt16     | K1C16_MOUSE | 52 kDa  | 0  | 0  | 0  | 0 | 2 | 0 |
| Decorin                              | Dcn       | PGS2_MOUSE  | 40 kDa  | 2  | 0  | 0  | 0 | 0 | 0 |
| Afadin                               | Afdn      | AFAD_MOUSE  | 207 kDa | 2  | 0  | 0  | 0 | 0 | 0 |
| von Willebrand factor A domain-co    | Vwa8      | VWA8_MOUSE  | 213 kDa | 0  | 0  | 2  | 0 | 0 | 0 |
| LIM domain-binding protein 3         | Ldb3      | LDB3_MOUSE  | 76 kDa  | 0  | 2  | 0  | 0 | 0 | 0 |
| 60 kDa heat shock protein, mitoch    | Hspd1     | CH60_MOUSE  | 61 kDa  | 0  | 2  | 0  | 0 | 0 | 0 |
| Interferon-inducible GTPase 1        | Iigp1     | IIGP1_MOUSE | 48 kDa  | 0  | 2  | 0  | 0 | 0 | 0 |
| Periostin                            | Postn     | POSTN_MOUSE | 93 kDa  | 2  | 0  | 1  | 0 | 0 | 0 |
| Keratin, type II cytoskeletal 6A     | Krt6a     | K2C6A_MOUSE | 59 kDa  | 0  | 0  | 0  | 0 | 3 | 0 |
| Aminopeptidase N                     | Anpep     | AMPN_MOUSE  | 110 kDa | 0  | 1  | 2  | 0 | 0 | 0 |
| Liver carboxylesterase 1             | Ces1      | EST1_MOUSE  | 63 kDa  | 0  | 3  | 0  | 0 | 0 | 0 |
| Selenium-binding protein 2           | Selenbp2  | SBP2_MOUSE  | 53 kDa  | 0  | 1  | 2  | 0 | 0 | 0 |
| Aldehyde dehydrogenase, cytosoli     | Aldh1a7   | AL1A7_MOUSE | 55 kDa  | 0  | 0  | 3  | 0 | 0 | 0 |
| Carboxylesterase 1F                  | Ces1f     | CES1F_MOUSE | 62 kDa  | 0  | 2  | 1  | 0 | 0 | 0 |
| 3 beta-hydroxysteroid dehydrogen     | Hsd3b3    | 3BHS3_MOUSE | 42 kDa  | 0  | 3  | 0  | 0 | 0 | 0 |
| Small nuclear ribonucleoprotein S    | Snrpd3    | SMD3_MOUSE  | 14 kDa  | 0  | 2  | 1  | 0 | 0 | 0 |
| Mitochondrial fission process prote  | Mtfp1     | MTFP1_MOUSE | 18 kDa  | 0  | 0  | 3  | 0 | 0 | 0 |
| Obscurin                             | Obscn     | OBSCN_MOUSE | 966 kDa | 2  | 2  | 0  | 0 | 0 | 0 |

|                                     |           |              |         |   |   |   |   |   |   |
|-------------------------------------|-----------|--------------|---------|---|---|---|---|---|---|
| Cytoplasmic dynein 1 heavy chain    | Dync1h1   | DYHC1_MOUSE  | 532 kDa | 1 | 2 | 1 | 0 | 0 | 0 |
| Peroxisomal acyl-coenzyme A oxid    | Acox2     | ACOX2_MOUSE  | 77 kDa  | 0 | 3 | 1 | 0 | 0 | 0 |
| Estradiol 17 beta-dehydrogenase     | Akr1c6    | DHB5_MOUSE   | 37 kDa  | 0 | 2 | 2 | 0 | 0 | 0 |
| Metalloreductase STEAP4             | Steap4    | STEAP4_MOUSE | 53 kDa  | 1 | 0 | 3 | 0 | 0 | 0 |
| Collagen alpha-1(VIII) chain        | Col8a1    | CO8A1_MOUSE  | 74 kDa  | 2 | 3 | 0 | 0 | 0 | 0 |
| Heterogeneous nuclear ribonucleo    | Hnrnpm    | HNRPM_MOUSE  | 78 kDa  | 0 | 2 | 3 | 0 | 0 | 0 |
| Kelch-like protein 41               | Klhl41    | KLH41_MOUSE  | 68 kDa  | 1 | 2 | 2 | 0 | 0 | 0 |
| Ribosome-binding protein 1          | Rrbp1     | RRBP1_MOUSE  | 173 kDa | 0 | 0 | 4 | 0 | 1 | 0 |
| Pregnancy zone protein              | Pzp       | PZP_MOUSE    | 166 kDa | 1 | 2 | 2 | 0 | 0 | 0 |
| Very long-chain specific acyl-CoA   | Acadvl    | ACADV_MOUSE  | 71 kDa  | 0 | 4 | 1 | 0 | 0 | 0 |
| Canalicular multispecific organic a | Abcc2     | MRP2_MOUSE   | 174 kDa | 0 | 3 | 2 | 0 | 0 | 0 |
| Hydroxymethylglutaryl-CoA lyase,    | Hmgcl     | HMGCL_MOUSE  | 34 kDa  | 0 | 3 | 2 | 0 | 0 | 0 |
| 1,4-alpha-glucan-branching enzym    | Gbe1      | GLGB_MOUSE   | 80 kDa  | 0 | 2 | 3 | 0 | 0 | 0 |
| 40S ribosomal protein S6            | Rps6      | RS6_MOUSE    | 29 kDa  | 0 | 4 | 1 | 0 | 0 | 0 |
| Dimethylglycine dehydrogenase, n    | Dmgdh     | M2GD_MOUSE   | 97 kDa  | 0 | 2 | 3 | 0 | 0 | 0 |
| Redox-regulatory protein FAM213     | Fam213a   | F213A_MOUSE  | 24 kDa  | 0 | 3 | 2 | 0 | 0 | 0 |
| Regucalcin                          | Rgn       | RGN_MOUSE    | 33 kDa  | 1 | 2 | 2 | 0 | 0 | 0 |
| Cystathionine gamma-lyase           | Cth       | CGL_MOUSE    | 44 kDa  | 0 | 3 | 2 | 0 | 0 | 0 |
| GTP-binding protein SAR1b           | Sar1b     | SAR1B_MOUSE  | 22 kDa  | 0 | 2 | 3 | 0 | 0 | 0 |
| Ornithine carbamoyltransferase, m   | Otc       | OTC_MOUSE    | 40 kDa  | 0 | 3 | 2 | 0 | 0 | 0 |
| Laminin subunit alpha-5             | Lama5     | LAMA5_MOUSE  | 404 kDa | 2 | 2 | 2 | 0 | 0 | 0 |
| Laminin subunit beta-2              | Lamb2     | LAMB2_MOUSE  | 197 kDa | 2 | 2 | 2 | 0 | 0 | 0 |
| Caveolin-1                          | Cav1      | CAV1_MOUSE   | 21 kDa  | 1 | 2 | 3 | 0 | 0 | 0 |
| Bifunctional epoxide hydrolase 2    | Ephx2     | HYES_MOUSE   | 63 kDa  | 0 | 4 | 2 | 0 | 0 | 0 |
| Phosphatidylinositol-binding clathr | Picalm    | PICAL_MOUSE  | 72 kDa  | 1 | 2 | 3 | 0 | 0 | 0 |
| Alpha-1-antitrypsin 1-4             | Serpina1d | A1AT4_MOUSE  | 46 kDa  | 2 | 2 | 2 | 0 | 0 | 0 |
| NADH dehydrogenase [ubiquinone]     | Ndufb8    | NDUB8_MOUSE  | 22 kDa  | 2 | 2 | 2 | 0 | 0 | 0 |
| Probable ATP-dependent RNA hel      | Ddx17     | DDX17_MOUSE  | 72 kDa  | 1 | 2 | 3 | 0 | 0 | 0 |
| Acyl-coenzyme A synthetase ACS      | Acsm1     | ACSM1_MOUSE  | 65 kDa  | 0 | 4 | 2 | 0 | 0 | 0 |
| Nodal modulator 1                   | Nomo1     | NOMO1_MOUSE  | 133 kDa | 1 | 1 | 4 | 0 | 0 | 0 |
| Mitochondrial import receptor subu  | Tomm70    | TOM70_MOUSE  | 68 kDa  | 0 | 0 | 4 | 0 | 2 | 0 |
| 2-hydroxyacyl-CoA lyase 1           | Hacl1     | HACL1_MOUSE  | 64 kDa  | 0 | 3 | 3 | 0 | 0 | 0 |
| D-beta-hydroxybutyrate dehydroge    | Bdh1      | BDH_MOUSE    | 38 kDa  | 0 | 2 | 4 | 0 | 0 | 0 |
| Cytochrome b-c1 complex subunit     | Uqcrcq    | QCR8_MOUSE   | 10 kDa  | 0 | 2 | 4 | 0 | 0 | 0 |
| Erythrocyte band 7 integral membl   | Stom      | STOM_MOUSE   | 31 kDa  | 1 | 2 | 3 | 0 | 0 | 0 |
| Aspartate aminotransferase, mitoc   | Got2      | AATM_MOUSE   | 47 kDa  | 0 | 4 | 2 | 0 | 0 | 0 |
| Arylacetamide deacetylase           | Aadac     | AAAD_MOUSE   | 45 kDa  | 0 | 5 | 1 | 0 | 0 | 0 |
| 17-beta-hydroxysteroid dehydroge    | Hsd17b6   | H17B6_MOUSE  | 36 kDa  | 0 | 4 | 2 | 0 | 0 | 0 |
| Farnesyl pyrophosphate synthase     | Fdps      | FPPS_MOUSE   | 41 kDa  | 2 | 3 | 1 | 0 | 0 | 0 |
| 60S ribosomal protein L27           | Rpl27     | RL27_MOUSE   | 16 kDa  | 3 | 3 | 0 | 0 | 0 | 0 |
| Ras GTPase-activating-like protei   | Iqgap2    | IQGA2_MOUSE  | 181 kDa | 3 | 3 | 1 | 0 | 0 | 0 |
| Collagen alpha-5(VI) chain          | Col6a5    | CO6A5_MOUSE  | 290 kDa | 2 | 3 | 2 | 0 | 0 | 0 |
| Tight junction protein ZO-1         | Tjp1      | ZO1_MOUSE    | 195 kDa | 3 | 2 | 2 | 0 | 0 | 0 |
| Fumarylacetoacetase                 | Fah       | FAAA_MOUSE   | 46 kDa  | 0 | 4 | 3 | 0 | 0 | 0 |
| Succinate dehydrogenase [ubiquin    | Sdhb      | SDHB_MOUSE   | 32 kDa  | 2 | 3 | 2 | 0 | 0 | 0 |
| Heterogeneous nuclear ribonucleo    | Hnrnp1    | HNRH1_MOUSE  | 49 kDa  | 3 | 4 | 0 | 0 | 0 | 0 |
| Coatomer subunit gamma-1            | Copg1     | COPG1_MOUSE  | 98 kDa  | 3 | 2 | 2 | 0 | 0 | 0 |
| 40S ribosomal protein S16           | Rps16     | RS16_MOUSE   | 16 kDa  | 1 | 4 | 2 | 0 | 0 | 0 |
| Ankyrin-1                           | Ank1      | ANK1_MOUSE   | 204 kDa | 2 | 1 | 4 | 0 | 1 | 0 |
| Lamina-associated polypeptide 2,    | Tmpo      | LAP2B_MOUSE  | 50 kDa  | 4 | 1 | 3 | 0 | 0 | 0 |
| Steroid 17-alpha-hydroxylase/17,2   | Cyp17a1   | CP17A_MOUSE  | 58 kDa  | 3 | 3 | 2 | 0 | 0 | 0 |
| Sodium/potassium-transporting AT    | Atp1b1    | AT1B1_MOUSE  | 35 kDa  | 3 | 2 | 3 | 0 | 0 | 0 |
| Argininosuccinate lyase             | Asl       | ARLY_MOUSE   | 52 kDa  | 0 | 6 | 2 | 0 | 0 | 0 |
| Urocanate hydratase                 | Uroc1     | HUTU_MOUSE   | 75 kDa  | 2 | 4 | 2 | 0 | 0 | 0 |
| Flotillin-2                         | Flot2     | FLOT2_MOUSE  | 47 kDa  | 3 | 3 | 2 | 0 | 0 | 0 |
| C-1-tetrahydrofolate synthase, cyt  | Mthfd1    | C1TC_MOUSE   | 101 kDa | 0 | 5 | 3 | 0 | 0 | 0 |
| Ras-related protein Rab-1A          | Rab1A     | RAB1A_MOUSE  | 23 kDa  | 0 | 4 | 4 | 0 | 0 | 0 |
| 40S ribosomal protein S9            | Rps9      | RS9_MOUSE    | 23 kDa  | 0 | 4 | 4 | 0 | 0 | 0 |
| Vinculin                            | Vcl       | VINC_MOUSE   | 117 kDa | 3 | 1 | 4 | 1 | 0 | 0 |
| Carnitine O-palmitoyltransferase 1  | Cpt1b     | CPT1B_MOUSE  | 88 kDa  | 2 | 5 | 2 | 0 | 0 | 0 |
| 14-3-3 protein sigma                | Sfn       | 1433S_MOUSE  | 28 kDa  | 1 | 4 | 4 | 0 | 0 | 0 |
| Sodium/potassium-transporting AT    | Atp1a2    | AT1A2_MOUSE  | 112 kDa | 1 | 4 | 4 | 0 | 0 | 0 |
| Solute carrier organic anion transp | Slco1a6   | SO1A6_MOUSE  | 74 kDa  | 1 | 4 | 4 | 0 | 0 | 0 |
| Cytochrome b-c1 complex subunit     | Uqcrcf1   | UCRI_MOUSE   | 29 kDa  | 2 | 2 | 3 | 0 | 2 | 0 |
| Leukotriene-B4 omega-hydroxylas     | Cyp4f14   | CP4FE_MOUSE  | 60 kDa  | 1 | 4 | 4 | 0 | 0 | 0 |
| Monocarboxylate transporter 1       | Slc16a1   | MOT1_MOUSE   | 53 kDa  | 2 | 4 | 3 | 0 | 0 | 0 |
| Vesicle-trafficking protein SEC22b  | Sec22b    | SC22B_MOUSE  | 25 kDa  | 2 | 2 | 4 | 0 | 1 | 0 |
| Mitochondrial import inner membra   | Timm50    | TIM50_MOUSE  | 40 kDa  | 1 | 4 | 4 | 0 | 0 | 0 |

|                                      |         |             |         |   |    |    |   |   |   |
|--------------------------------------|---------|-------------|---------|---|----|----|---|---|---|
| Glutamate dehydrogenase 1, mito      | Glud1   | DHE3_MOUSE  | 61 kDa  | 0 | 5  | 4  | 0 | 0 | 0 |
| NADH dehydrogenase [ubiquinone]      | Ndufb10 | NDUBA_MOUSE | 21 kDa  | 1 | 4  | 4  | 0 | 0 | 0 |
| Myosin-11                            | Myh11   | MYH11_MOUSE | 227 kDa | 3 | 3  | 4  | 0 | 0 | 0 |
| Myosin regulatory light chain 2, sk  | Mylpf   | MLRS_MOUSE  | 19 kDa  | 1 | 5  | 4  | 0 | 0 | 0 |
| Splicing factor, proline- and glutam | Sfpq    | SFPQ_MOUSE  | 75 kDa  | 2 | 4  | 4  | 0 | 0 | 0 |
| Platelet glycoprotein 4              | Cd36    | CD36_MOUSE  | 53 kDa  | 0 | 6  | 4  | 0 | 0 | 0 |
| Transforming growth factor-beta-in   | Tgfb1   | BGH3_MOUSE  | 75 kDa  | 6 | 1  | 3  | 0 | 0 | 0 |
| Stress-70 protein, mitochondrial     | Hspa9   | GRP75_MOUSE | 73 kDa  | 0 | 6  | 4  | 0 | 0 | 0 |
| Annexin A7                           | Anxa7   | ANXA7_MOUSE | 50 kDa  | 2 | 3  | 5  | 0 | 0 | 0 |
| Malectin                             | Mlec    | MLEC_MOUSE  | 32 kDa  | 2 | 3  | 3  | 0 | 2 | 0 |
| Fatty acid desaturase 2              | Fads2   | FADS2_MOUSE | 52 kDa  | 1 | 3  | 6  | 0 | 0 | 0 |
| Sorbitol dehydrogenase               | Sord    | DHSO_MOUSE  | 38 kDa  | 1 | 5  | 4  | 0 | 0 | 0 |
| Succinate dehydrogenase [ubiquin     | Sdha    | SDHA_MOUSE  | 73 kDa  | 2 | 3  | 5  | 0 | 0 | 0 |
| Fatty-acid amide hydrolase 1         | Faah    | FAAH1_MOUSE | 63 kDa  | 1 | 5  | 4  | 0 | 0 | 0 |
| Receptor expression-enhancing pr     | Reep6   | REEP6_MOUSE | 22 kDa  | 2 | 6  | 2  | 0 | 0 | 0 |
| Myomesin-1                           | Myom1   | MYOM1_MOUSE | 185 kDa | 3 | 3  | 5  | 0 | 0 | 0 |
| Epidermal growth factor receptor     | Egfr    | EGFR_MOUSE  | 135 kDa | 3 | 4  | 4  | 0 | 0 | 0 |
| Multidrug resistance-associated pr   | Abcc6   | MRP6_MOUSE  | 165 kDa | 3 | 3  | 5  | 0 | 0 | 0 |
| 40S ribosomal protein S11            | Rps11   | RS11_MOUSE  | 18 kDa  | 3 | 4  | 4  | 0 | 0 | 0 |
| Protein disulfide-isomerase          | P4hb    | PDIA1_MOUSE | 57 kDa  | 1 | 8  | 2  | 0 | 0 | 0 |
| Malonyl-CoA decarboxylase, mito      | Mlycd   | DCMC_MOUSE  | 55 kDa  | 3 | 3  | 5  | 0 | 0 | 0 |
| Carboxylesterase 3A                  | Ces3a   | EST3A_MOUSE | 63 kDa  | 0 | 7  | 4  | 0 | 0 | 0 |
| Serine--pyruvate aminotransferase    | Agxt    | SPYA_MOUSE  | 46 kDa  | 1 | 5  | 5  | 0 | 0 | 0 |
| CDGS iron-sulfur domain-contain      | Cisd1   | CISD1_MOUSE | 12 kDa  | 0 | 4  | 6  | 0 | 1 | 0 |
| Laminin subunit gamma-1              | Lamc1   | LAMC1_MOUSE | 177 kDa | 3 | 4  | 4  | 0 | 1 | 0 |
| Cartilage intermediate layer protei  | Cilp2   | CILP2_MOUSE | 126 kDa | 9 | 2  | 1  | 0 | 0 | 0 |
| Asialoglycoprotein receptor 1        | Asgr1   | ASGR1_MOUSE | 33 kDa  | 0 | 5  | 7  | 0 | 0 | 0 |
| Elongation factor 2                  | Eef2    | EF2_MOUSE   | 95 kDa  | 1 | 6  | 4  | 0 | 1 | 0 |
| Complement C3                        | C3      | CO3_MOUSE   | 186 kDa | 2 | 6  | 4  | 0 | 0 | 0 |
| AP-2 complex subunit alpha-2         | Ap2a2   | AP2A2_MOUSE | 104 kDa | 0 | 7  | 5  | 0 | 0 | 0 |
| Protein-glutamine gamma-glutamyl     | Tgm1    | TGM1_MOUSE  | 90 kDa  | 2 | 6  | 4  | 0 | 0 | 0 |
| Sulfotransferase 1A1                 | Sult1a1 | ST1A1_MOUSE | 34 kDa  | 2 | 4  | 6  | 0 | 0 | 0 |
| Peroxisomal acyl-coenzyme A oxid     | Acox1   | ACOX1_MOUSE | 75 kDa  | 0 | 6  | 6  | 0 | 0 | 0 |
| NADH dehydrogenase [ubiquinone]      | Ndufa10 | NDUAA_MOUSE | 41 kDa  | 1 | 4  | 6  | 0 | 1 | 0 |
| 78 kDa glucose-regulated protein     | Hspa5   | GRP78_MOUSE | 72 kDa  | 1 | 7  | 4  | 0 | 0 | 0 |
| Metaxin-2                            | Mtx2    | MTX2_MOUSE  | 30 kDa  | 5 | 3  | 4  | 0 | 0 | 0 |
| Myelin protein P0                    | Mpz     | MYP0_MOUSE  | 28 kDa  | 1 | 5  | 3  | 0 | 4 | 0 |
| Fibulin-5                            | Fbln5   | FBLN5_MOUSE | 50 kDa  | 4 | 4  | 5  | 0 | 0 | 0 |
| Lumican                              | Lum     | LUM_MOUSE   | 38 kDa  | 6 | 4  | 3  | 0 | 0 | 0 |
| AP-2 complex subunit beta            | Ap2b1   | AP2B1_MOUSE | 105 kDa | 3 | 5  | 5  | 0 | 0 | 0 |
| S-adenosylmethionine synthase is     | Mat1a   | METK1_MOUSE | 44 kDa  | 1 | 3  | 9  | 0 | 0 | 0 |
| NADH dehydrogenase [ubiquinone]      | Ndufa13 | NDUAD_MOUSE | 17 kDa  | 3 | 4  | 4  | 0 | 2 | 0 |
| Sarcosine dehydrogenase, mitoch      | Sardh   | SARDH_MOUSE | 102 kDa | 0 | 7  | 6  | 0 | 0 | 0 |
| Peroxisomal bifunctional enzyme      | Ehhadh  | ECHP_MOUSE  | 78 kDa  | 2 | 4  | 7  | 0 | 0 | 0 |
| 60S ribosomal protein L18a           | Rpl18a  | RL18A_MOUSE | 21 kDa  | 3 | 4  | 4  | 1 | 1 | 0 |
| Signal peptidase complex catalytic   | Sec11a  | SC11A_MOUSE | 21 kDa  | 4 | 4  | 5  | 0 | 0 | 0 |
| Poly(rC)-binding protein 1           | Pcbp1   | PCBP1_MOUSE | 37 kDa  | 4 | 5  | 5  | 0 | 0 | 0 |
| 40S ribosomal protein S13            | Rps13   | RS13_MOUSE  | 17 kDa  | 2 | 5  | 7  | 0 | 0 | 0 |
| Spectrin alpha chain, non-erythro    | Sptan1  | SPTN1_MOUSE | 285 kDa | 4 | 4  | 7  | 0 | 0 | 0 |
| NADH-ubiquinone oxidoreductase       | Mtnd5   | NU5M_MOUSE  | 68 kDa  | 3 | 6  | 5  | 0 | 1 | 0 |
| ATP-dependent RNA helicase A         | Dhx9    | DHX9_MOUSE  | 149 kDa | 5 | 6  | 3  | 0 | 2 | 0 |
| Phospholipid-transporting ATPase     | Atp11c  | AT11C_MOUSE | 129 kDa | 5 | 6  | 5  | 0 | 0 | 0 |
| NADH dehydrogenase [ubiquinone]      | Ndufa8  | NDUA8_MOUSE | 20 kDa  | 3 | 6  | 7  | 0 | 0 | 0 |
| Translocon-associated protein sub    | Ssr1    | SSRA_MOUSE  | 32 kDa  | 4 | 4  | 8  | 0 | 0 | 0 |
| Glycogen phosphorylase, liver form   | Pygl    | PYGL_MOUSE  | 97 kDa  | 1 | 8  | 8  | 0 | 0 | 0 |
| Cytochrome P450 3A13                 | Cyp3a13 | CP3AD_MOUSE | 57 kDa  | 4 | 8  | 5  | 0 | 0 | 0 |
| 60S ribosomal protein L7             | Rpl7    | RL7_MOUSE   | 31 kDa  | 2 | 5  | 5  | 4 | 1 | 0 |
| Collagen alpha-1(XIV) chain          | Col14a1 | COEA1_MOUSE | 193 kDa | 3 | 4  | 4  | 4 | 3 | 0 |
| ATP synthase subunit a               | Mtstp6  | ATP6_MOUSE  | 25 kDa  | 5 | 7  | 6  | 0 | 0 | 0 |
| Collagen alpha-6(VI) chain           | Col6a6  | CO6A6_MOUSE | 246 kDa | 7 | 6  | 5  | 0 | 0 | 0 |
| Solute carrier family 22 member 1    | Slc22a1 | S22A1_MOUSE | 62 kDa  | 4 | 6  | 6  | 0 | 2 | 0 |
| Transmembrane emp24 domain-c         | Tmed10  | TMEDA_MOUSE | 25 kDa  | 4 | 4  | 8  | 1 | 2 | 0 |
| Tubulin beta-3 chain                 | Tubb3   | TBB3_MOUSE  | 50 kDa  | 4 | 6  | 8  | 0 | 2 | 0 |
| Fatty acid-binding protein, liver    | Fabp1   | FABPL_MOUSE | 14 kDa  | 4 | 8  | 8  | 0 | 0 | 0 |
| 40S ribosomal protein S3             | Rps3    | RS3_MOUSE   | 27 kDa  | 5 | 5  | 10 | 0 | 0 | 0 |
| Phenylalanine-4-hydroxylase          | Pah     | PH4H_MOUSE  | 52 kDa  | 6 | 7  | 8  | 0 | 0 | 0 |
| Peroxioredoxin-1                     | Prdx1   | PRDX1_MOUSE | 22 kDa  | 1 | 10 | 11 | 0 | 0 | 0 |
| Cytochrome c oxidase subunit 5A,     | Cox5a   | COX5A_MOUSE | 16 kDa  | 3 | 9  | 10 | 0 | 0 | 0 |

|                                     |          |             |         |    |    |    |   |   |   |
|-------------------------------------|----------|-------------|---------|----|----|----|---|---|---|
| Microsomal triglyceride transfer pr | Mttp     | MTP_MOUSE   | 99 kDa  | 1  | 14 | 7  | 0 | 0 | 0 |
| 40S ribosomal protein SA            | Rpsa     | RSSA_MOUSE  | 33 kDa  | 4  | 9  | 9  | 0 | 0 | 0 |
| Catalase                            | Cat      | CATA_MOUSE  | 60 kDa  | 0  | 14 | 9  | 0 | 0 | 0 |
| Fructose-1,6-bisphosphatase 1       | Fbp1     | F16P1_MOUSE | 37 kDa  | 0  | 12 | 11 | 0 | 0 | 0 |
| Cytochrome c oxidase subunit ND     | Ndufa4   | NDUA4_MOUSE | 9 kDa   | 3  | 8  | 8  | 2 | 2 | 0 |
| Dihydrolipoyllysine-residue acetyl  | Dlat     | ODP2_MOUSE  | 68 kDa  | 3  | 11 | 9  | 0 | 1 | 0 |
| 60S ribosomal protein L13           | Rpl13    | RL13_MOUSE  | 24 kDa  | 9  | 10 | 5  | 0 | 0 | 0 |
| Cytochrome P450 2E1                 | Cyp2e1   | CP2E1_MOUSE | 57 kDa  | 4  | 13 | 7  | 0 | 0 | 0 |
| ATP synthase subunit f, mitochon    | Atp5j2   | ATPK_MOUSE  | 10 kDa  | 8  | 8  | 6  | 0 | 2 | 0 |
| L-lactate dehydrogenase A chain     | Ldha     | LDHA_MOUSE  | 36 kDa  | 2  | 12 | 10 | 0 | 0 | 0 |
| Carboxylesterase 1D                 | Ces1d    | CES1D_MOUSE | 62 kDa  | 0  | 16 | 8  | 0 | 0 | 0 |
| 60S ribosomal protein L8            | Rpl8     | RL8_MOUSE   | 28 kDa  | 6  | 9  | 9  | 0 | 0 | 0 |
| Desmin                              | Des      | DESM_MOUSE  | 53 kDa  | 5  | 12 | 10 | 0 | 0 | 0 |
| Cytochrome P450 2A4                 | Cyp2a4   | CP2A4_MOUSE | 57 kDa  | 6  | 12 | 9  | 0 | 0 | 0 |
| Talin-1                             | Tln1     | TLN1_MOUSE  | 270 kDa | 8  | 8  | 12 | 0 | 1 | 0 |
| Cytochrome P450 3A41                | Cyp3a41a | CP341_MOUSE | 58 kDa  | 6  | 20 | 5  | 0 | 0 | 0 |
| Myosin-14                           | Myh14    | MYH14_MOUSE | 229 kDa | 11 | 9  | 12 | 0 | 0 | 0 |
| NADPH--cytochrome P450 reduct       | Por      | NCPR_MOUSE  | 77 kDa  | 4  | 15 | 11 | 0 | 2 | 0 |
| Protein transport protein Sec24A    | Sec24a   | SC24A_MOUSE | 119 kDa | 10 | 8  | 13 | 0 | 1 | 0 |
| Serum albumin                       | Alb      | ALBU_MOUSE  | 69 kDa  | 4  | 17 | 14 | 0 | 0 | 0 |
| 60S ribosomal protein L6            | Rpl6     | RL6_MOUSE   | 34 kDa  | 9  | 12 | 12 | 2 | 1 | 0 |
| Retinal dehydrogenase 1             | Aldh1a1  | AL1A1_MOUSE | 54 kDa  | 2  | 19 | 15 | 0 | 0 | 0 |
| Fibrinogen beta chain               | Fgb      | FIBB_MOUSE  | 55 kDa  | 20 | 10 | 7  | 0 | 0 | 0 |
| Tubulin alpha-4A chain              | Tuba4a   | TBA4A_MOUSE | 50 kDa  | 10 | 12 | 12 | 1 | 2 | 0 |
| ATP synthase subunit O, mitochor    | Atp5o    | ATPO_MOUSE  | 23 kDa  | 9  | 14 | 14 | 0 | 0 | 0 |
| Epoxide hydrolase 1                 | Ephx1    | HYEP_MOUSE  | 53 kDa  | 9  | 15 | 13 | 0 | 2 | 0 |
| Filamin-C                           | Flnc     | FLNC_MOUSE  | 291 kDa | 8  | 17 | 18 | 0 | 3 | 0 |
| Aldehyde dehydrogenase, mitoch      | Aldh2    | ALDH2_MOUSE | 57 kDa  | 3  | 28 | 18 | 0 | 0 | 0 |
| Myosin light chain 1/3, skeletal mu | Myl1     | MYL1_MOUSE  | 21 kDa  | 10 | 28 | 12 | 0 | 0 | 0 |
| Calcium-binding mitochondrial car   | Slc25a12 | CMC1_MOUSE  | 75 kDa  | 13 | 22 | 16 | 0 | 1 | 0 |
| Sodium/potassium-transporting AT    | Atp1a1   | AT1A1_MOUSE | 113 kDa | 16 | 17 | 15 | 0 | 5 | 0 |
| Thioredoxin-dependent peroxide r    | Prdx3    | PRDX3_MOUSE | 28 kDa  | 20 | 17 | 17 | 0 | 0 | 0 |
| Heat shock cognate 71 kDa protei    | Hspa8    | HSP7C_MOUSE | 71 kDa  | 12 | 28 | 23 | 0 | 0 | 0 |
| Triokinase/FMN cyclase              | Tkfc     | TKFC_MOUSE  | 60 kDa  | 14 | 28 | 22 | 0 | 1 | 0 |
| Catenin alpha-1                     | Ctnna1   | CTNA1_MOUSE | 100 kDa | 27 | 17 | 22 | 1 | 0 | 0 |
| Myosin-8                            | Myh8     | MYH8_MOUSE  | 223 kDa | 22 | 26 | 24 | 0 | 1 | 0 |
| Fibrillin-1                         | Fbn1     | FBN1_MOUSE  | 312 kDa | 24 | 21 | 30 | 0 | 0 | 0 |
| ATP synthase subunit beta, mitoch   | Atp5b    | ATPB_MOUSE  | 56 kDa  | 15 | 43 | 60 | 0 | 0 | 0 |
| Basement membrane-specific hep      | Hspg2    | PGBM_MOUSE  | 398 kDa | 43 | 30 | 47 | 1 | 3 | 0 |
| Myosin-7                            | Myh7     | MYH7_MOUSE  | 223 kDa | 27 | 60 | 59 | 0 | 4 | 0 |

**Supplementary Table S5 - Total protein and peptide IDs  
from data-dependent LC-MS/MS data**

| Tissue                                  | DDA LC-MS/MS Metric          | CNBr Specific | Shared     | NH <sub>2</sub> OH Specific |
|-----------------------------------------|------------------------------|---------------|------------|-----------------------------|
| Bone                                    | <i>Total Protein IDs</i>     | 6             | 97         | 2                           |
|                                         | <i>Total Unique Peptides</i> | 287           | 633        | 962                         |
| Skin                                    | <i>Total Protein IDs</i>     | 66            | 225        | 79                          |
|                                         | <i>Total Unique Peptides</i> | 280           | 557        | 767                         |
| Lung                                    | <i>Total Protein IDs</i>     | 86            | 221        | 84                          |
|                                         | <i>Total Unique Peptides</i> | 89            | 326        | 1051                        |
| Muscle                                  | <i>Total Protein IDs</i>     | 77            | 213        | 63                          |
|                                         | <i>Total Unique Peptides</i> | 675           | 1201       | 790                         |
| Liver                                   | <i>Total Protein IDs</i>     | 80            | 380        | 28                          |
|                                         | <i>Total Unique Peptides</i> | 2119          | 796        | 377                         |
| <b><i>Average Total Protein IDs</i></b> |                              | <b>63</b>     | <b>227</b> | <b>51</b>                   |
| <b><i>Average Total Peptide IDs</i></b> |                              | <b>690</b>    | <b>703</b> | <b>789</b>                  |

Supplementary Figure S1 - CNBr and NH<sub>2</sub>OH reaction mechanisms

**A**

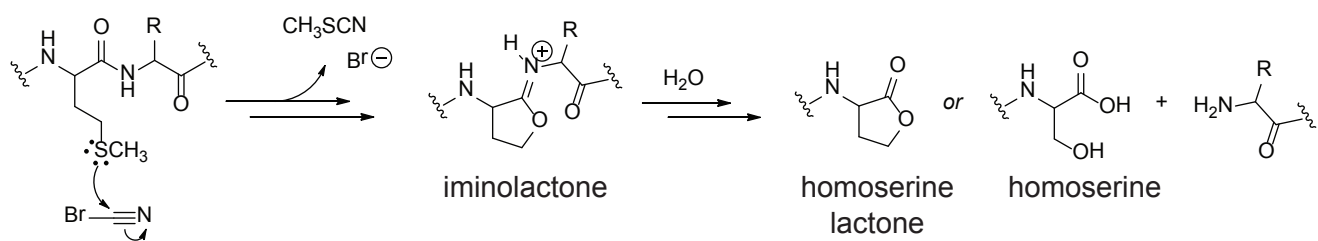

**B**

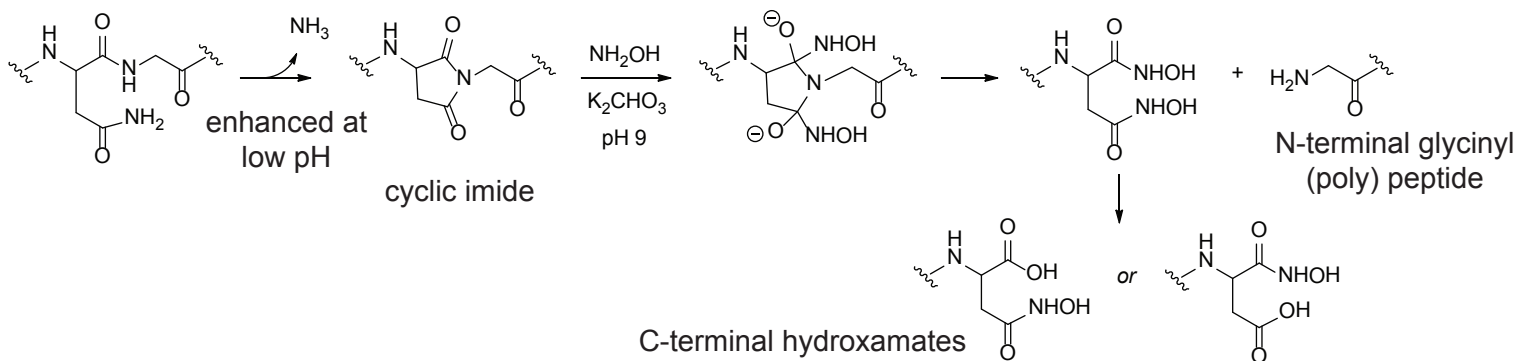

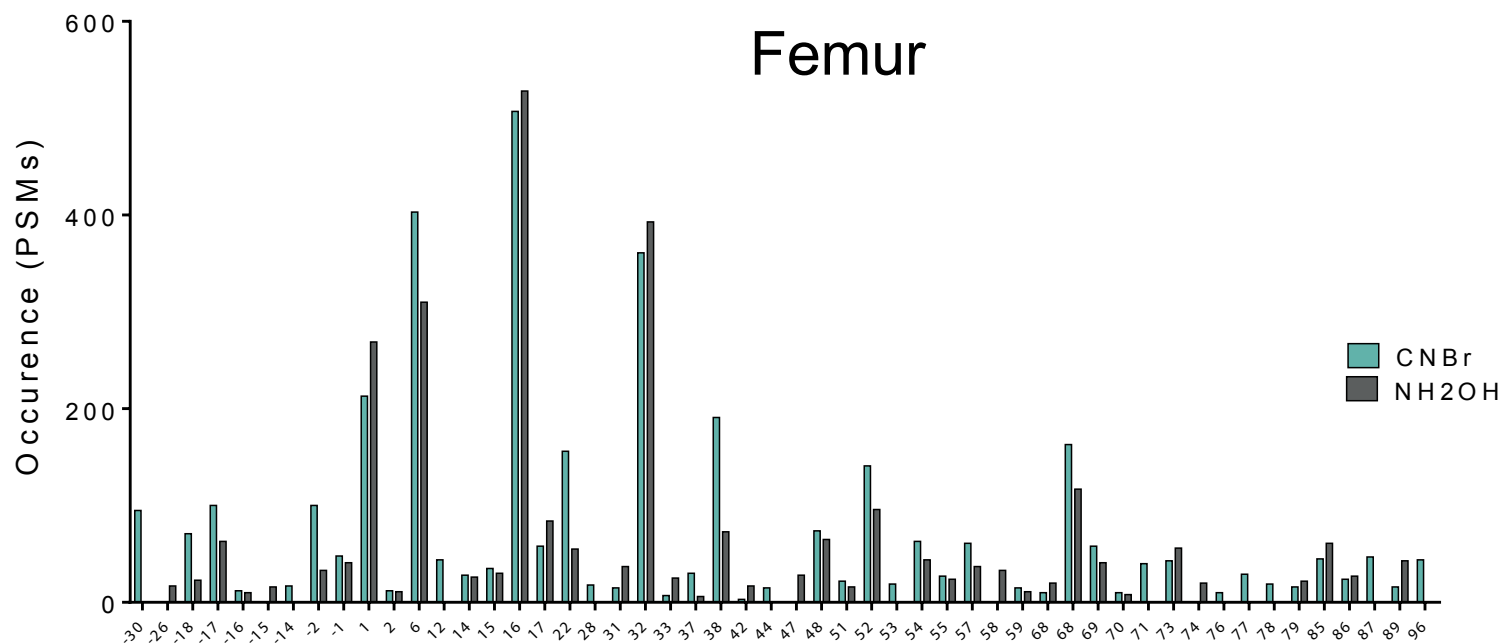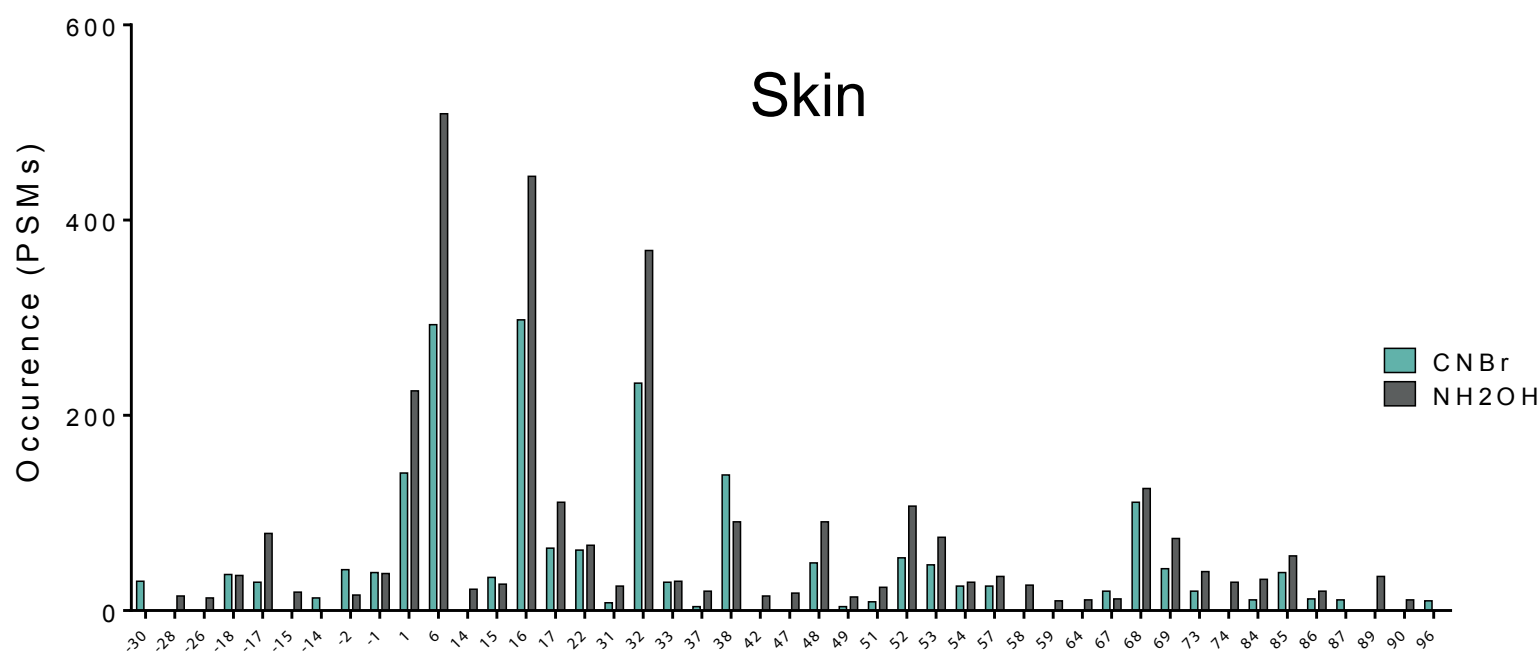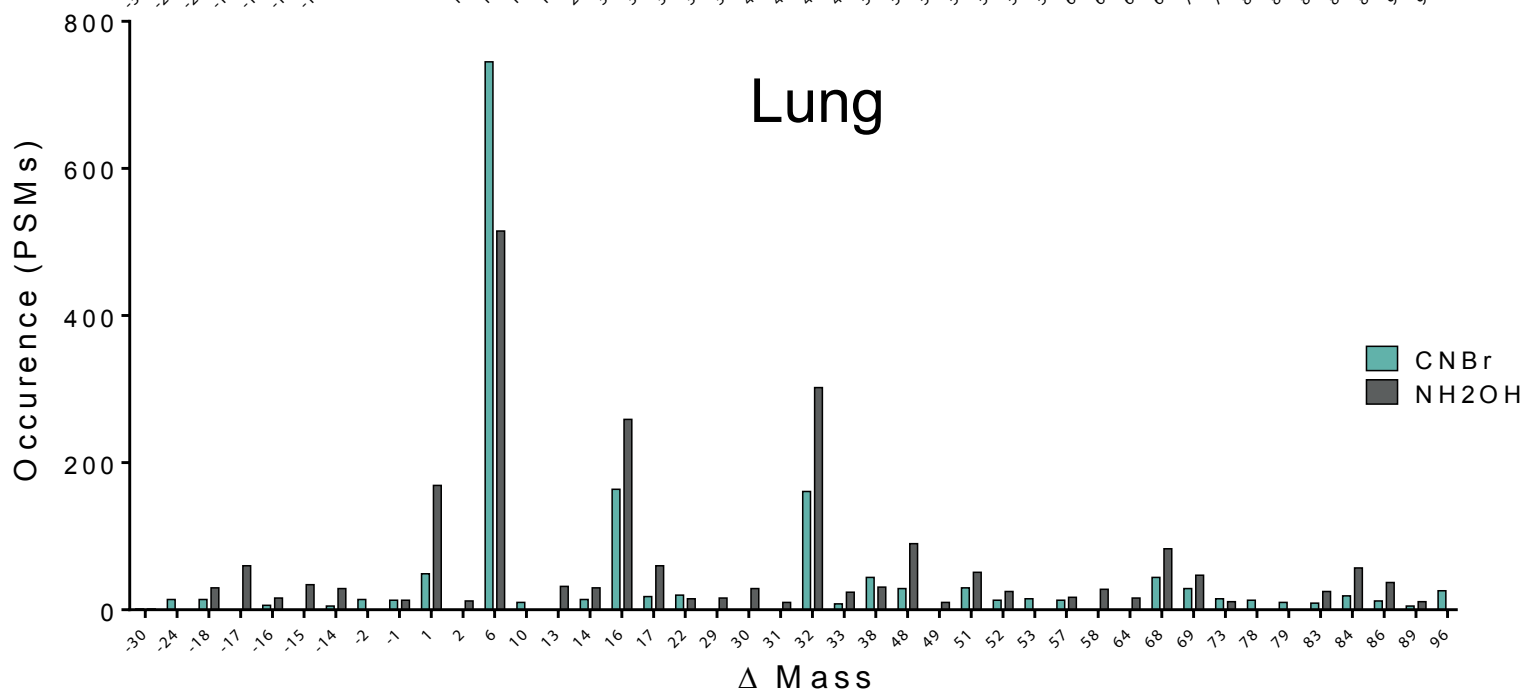



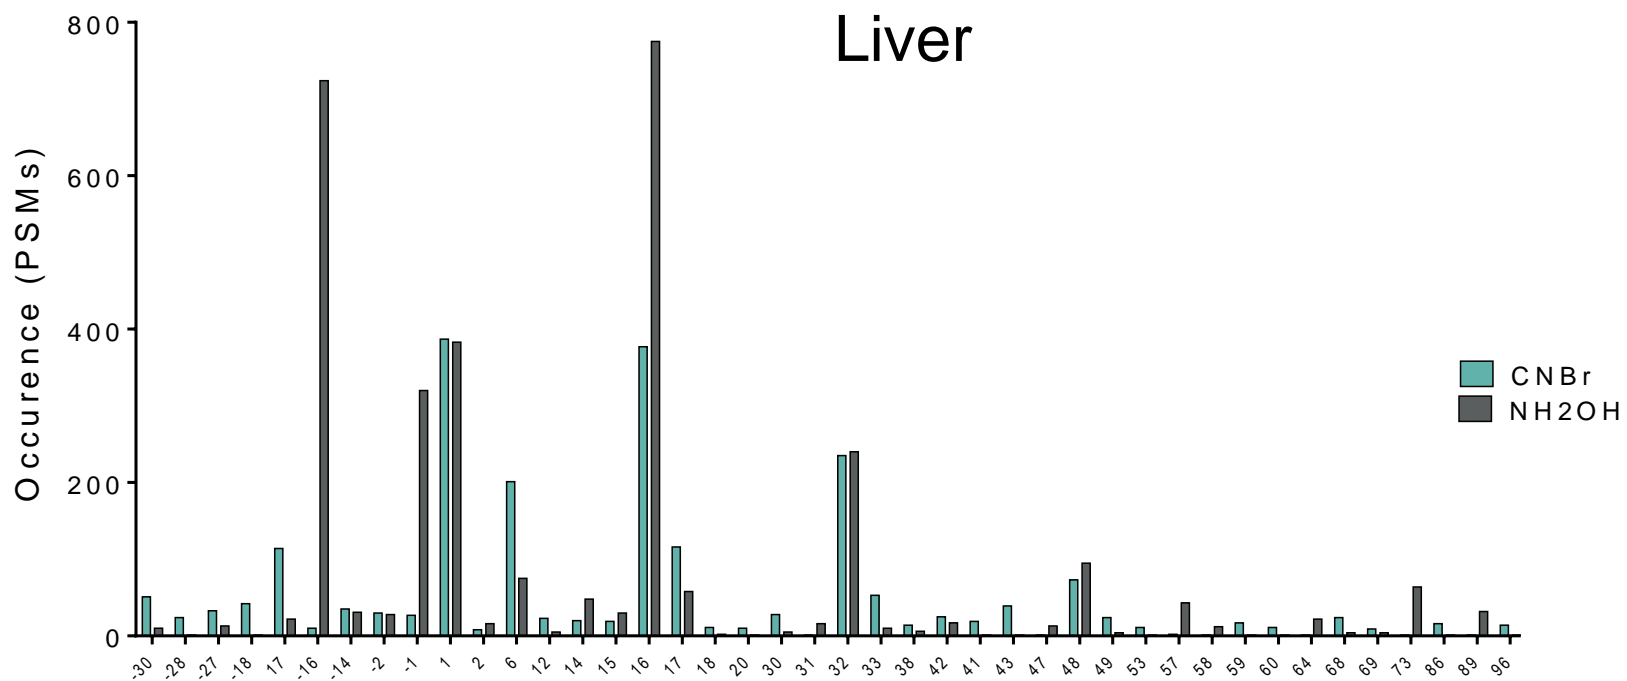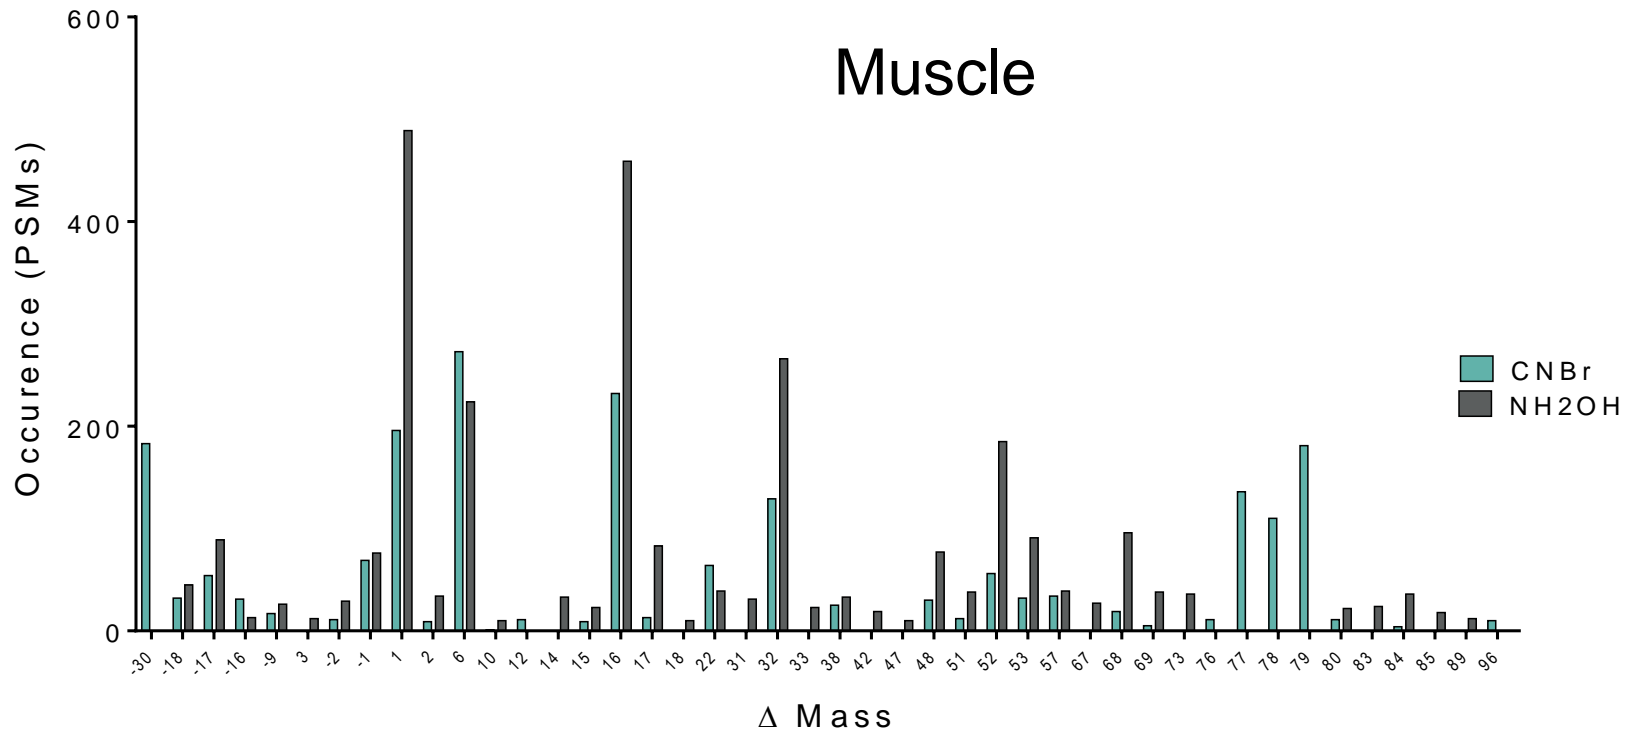

Supplement: NIHMS936975-supplement-Supplement.pdf [file NIHMS936975-supplement-Supplement.pdf]
